# Supplementary material for: Complete Genome Analysis of Three Acinetobacter baumannii Clinical Isolates in China for Insight into the Diversification of Drug Resistance Elements
Source: PLoS One. 2013 Jun 24;8(6):e66584. doi: 10.1371/journal.pone.0066584 (PMC3691203; doi:10.1371/journal.pone.0066584)
Supplement: Table S1 — List of 1119 conserved genes among all 14 Acinetobacter baumannii strains. (XLSX) [file pone.0066584.s006.xlsx]

## Sheet: Sheet1
BJAB0715	BJAB0868	BJAB07104	AB0057	AB1656-2	AB307-0294	ABTCDC0715	MDR-TJ	ACICU	ADP1	ATCC17978	AYE	MDR-ZJ06	SDF
BJ-AB0715_00004	BJ-AB0868_00004	BJ-AB07104_00003	AB57_0002	ABK1_0002	ABBFA_000013	ABTW07_3866	ABTJ_00013	ACICU_03663	ACIAD0011	A1S_0013	ABAYE0013	ABZJ_03855	ABSDF0018
BJ-AB0715_00007	BJ-AB0868_00007	BJ-AB07104_00006	AB57_0005	ABK1_0005	ABBFA_000010	ABTW07_0003	ABTJ_00010	ACICU_03666	ACIAD0009	A1S_0010	ABAYE0010	ABZJ_03858	ABSDF0011
BJ-AB0715_00008	BJ-AB0868_00008	BJ-AB07104_00007	AB57_0006	ABK1_0006	ABBFA_000009	ABTW07_0004	ABTJ_00009	ACICU_03667	ACIAD0008	A1S_0009	ABAYE0009	ABZJ_03859	ABSDF0010
BJ-AB0715_00010	BJ-AB0868_00010	BJ-AB07104_00010	AB57_0014	ABK1_0008	ABBFA_000007	ABTW07_0006	ABTJ_00007	ACICU_03669	ACIAD0007	A1S_0007	ABAYE0007	ABZJ_03862	ABSDF0007
BJ-AB0715_00013	BJ-AB0868_00013	BJ-AB07104_00013	AB57_0017	ABK1_0011	ABBFA_000004	ABTW07_0009	ABTJ_00004	ACICU_00002	ACIAD0004	A1S_0004	ABAYE0004	ABZJ_00002	ABSDF0004
BJ-AB0715_00016	BJ-AB0868_00016	BJ-AB07104_00016	AB57_0020	ABK1_0014	ABBFA_000001	ABTW07_0012	ABTJ_00001	ACICU_00005	ACIAD0001	A1S_0001	ABAYE0001	ABZJ_00005	ABSDF0001
BJ-AB0715_00019	BJ-AB0868_00019	BJ-AB07104_00019	AB57_0023	ABK1_0017	ABBFA_003529	ABTW07_0015	ABTJ_03836	ACICU_00008	ACIAD3682	A1S_2982	ABAYE3901	ABZJ_00008	ABSDF3681
BJ-AB0715_00021	BJ-AB0868_00021	BJ-AB07104_00021	AB57_0026	ABK1_0019	ABBFA_003527	ABTW07_0017	ABTJ_03834	ACICU_00010	ACIAD3680	A1S_2979	ABAYE3899	ABZJ_00010	ABSDF3679
BJ-AB0715_00025	BJ-AB0868_00025	BJ-AB07104_00025	AB57_0030	ABK1_0023	ABBFA_003523	ABTW07_0021	ABTJ_03830	ACICU_00014	ACIAD3672	A1S_2975	ABAYE3888	ABZJ_00014	ABSDF3675
BJ-AB0715_00029	BJ-AB0868_00029	BJ-AB07104_00029	AB57_0034	ABK1_0026	ABBFA_003519	ABTW07_0024	ABTJ_03826	ACICU_00017	ACIAD0459	A1S_2971	ABAYE3884	ABZJ_00017	ABSDF3671
BJ-AB0715_00032	BJ-AB0868_00032	BJ-AB07104_00032	AB57_0037	ABK1_0029	ABBFA_003516	ABTW07_0027	ABTJ_03823	ACICU_00020	ACIAD3666	A1S_2969	ABAYE3881	ABZJ_00020	ABSDF3667
BJ-AB0715_00035	BJ-AB0868_00035	BJ-AB07104_00035	AB57_0040	ABK1_0032	ABBFA_003513	ABTW07_0030	ABTJ_03820	ACICU_00023	ACIAD3663	A1S_2966	ABAYE3877	ABZJ_00023	ABSDF3663
BJ-AB0715_00038	BJ-AB0868_00038	BJ-AB07104_00038	AB57_0042	ABK1_0034	ABBFA_003511	ABTW07_0032	ABTJ_03818	ACICU_00025	ACIAD3659	A1S_2964	ABAYE3872	ABZJ_00025	ABSDF3659
BJ-AB0715_00040	BJ-AB0868_00040	BJ-AB07104_00040	AB57_0044	ABK1_0036	ABBFA_003509	ABTW07_0034	ABTJ_03815	ACICU_00027	ACIAD3657	A1S_2962	ABAYE3869	ABZJ_00028	ABSDF3657
BJ-AB0715_00057	BJ-AB0868_00056	BJ-AB07104_00055	AB57_0059	ABK1_0050	ABBFA_003492	ABTW07_0048	ABTJ_03795	ACICU_00040	ACIAD0020	A1S_0018	ABAYE3854	ABZJ_00042	ABSDF0025
BJ-AB0715_00058	BJ-AB0868_00057	BJ-AB07104_00056	AB57_0060	ABK1_0051	ABBFA_003491	ABTW07_0049	ABTJ_03794	ACICU_00041	ACIAD0021	A1S_0019	ABAYE3853	ABZJ_00043	ABSDF0026
BJ-AB0715_00059	BJ-AB0868_00058	BJ-AB07104_00057	AB57_0061	ABK1_0052	ABBFA_003490	ABTW07_0050	ABTJ_03793	ACICU_00042	ACIAD0022	A1S_0020	ABAYE3852	ABZJ_00044	ABSDF0027
BJ-AB0715_00061	BJ-AB0868_00060	BJ-AB07104_00059	AB57_0063	ABK1_0054	ABBFA_003488	ABTW07_0052	ABTJ_03791	ACICU_00044	ACIAD0024	A1S_0023	ABAYE3848	ABZJ_00046	ABSDF0029
BJ-AB0715_00064	BJ-AB0868_00063	BJ-AB07104_00062	AB57_0066	ABK1_0057	ABBFA_003485	ABTW07_0055	ABTJ_03788	ACICU_00047	ACIAD0034	A1S_0026	ABAYE3844	ABZJ_00049	ABSDF0033
BJ-AB0715_00066	BJ-AB0868_00065	BJ-AB07104_00064	AB57_0068	ABK1_0059	ABBFA_003483	ABTW07_0057	ABTJ_03786	ACICU_00049	ACIAD0036	A1S_0028	ABAYE3842	ABZJ_00051	ABSDF0035
BJ-AB0715_00067	BJ-AB0868_00066	BJ-AB07104_00065	AB57_0069	ABK1_0060	ABBFA_003482	ABTW07_0058	ABTJ_03785	ACICU_00050	ACIAD0037	A1S_0029	ABAYE3841	ABZJ_00052	ABSDF0037
BJ-AB0715_00068	BJ-AB0868_00067	BJ-AB07104_00066	AB57_0070	ABK1_0061	ABBFA_003481	ABTW07_0059	ABTJ_03784	ACICU_00051	ACIAD0038	A1S_0030	ABAYE3840	ABZJ_00053	ABSDF0038
BJ-AB0715_00069	BJ-AB0868_00068	BJ-AB07104_00067	AB57_0071	ABK1_0062	ABBFA_003480	ABTW07_0060	ABTJ_03783	ACICU_00052	ACIAD0039	A1S_0031	ABAYE3839	ABZJ_00054	ABSDF0039
BJ-AB0715_00072	BJ-AB0868_00071	BJ-AB07104_00070	AB57_0074	ABK1_0065	ABBFA_003477	ABTW07_0063	ABTJ_03780	ACICU_00055	ACIAD0042	A1S_0034	ABAYE3836	ABZJ_00057	ABSDF0043
BJ-AB0715_00073	BJ-AB0868_00072	BJ-AB07104_00071	AB57_0075	ABK1_0066	ABBFA_003476	ABTW07_0064	ABTJ_03779	ACICU_00056	ACIAD0043	A1S_0035	ABAYE3835	ABZJ_00058	ABSDF0044
BJ-AB0715_00075	BJ-AB0868_00074	BJ-AB07104_00073	AB57_0077	ABK1_0068	ABBFA_003474	ABTW07_0066	ABTJ_03777	ACICU_00058	ACIAD0045	A1S_0037	ABAYE3833	ABZJ_00060	ABSDF0046
BJ-AB0715_00078	BJ-AB0868_00077	BJ-AB07104_00076	AB57_0080	ABK1_0071	ABBFA_003471	ABTW07_0069	ABTJ_03774	ACICU_00061	ACIAD0048	A1S_0040	ABAYE3830	ABZJ_00063	ABSDF0049
BJ-AB0715_00079	BJ-AB0868_00078	BJ-AB07104_00077	AB57_0081	ABK1_0072	ABBFA_003470	ABTW07_0070	ABTJ_03773	ACICU_00062	ACIAD0049	A1S_0041	ABAYE3829	ABZJ_00064	ABSDF0050
BJ-AB0715_00084	BJ-AB0868_00083	BJ-AB07104_00082	AB57_0085	ABK1_0077	ABBFA_003466	ABTW07_0074	ABTJ_03769	ACICU_00066	ACIAD0062	A1S_0044	ABAYE3823	ABZJ_00069	ABSDF0056
BJ-AB0715_00086	BJ-AB0868_00085	BJ-AB07104_00084	AB57_0088	ABK1_0079	ABBFA_003464	ABTW07_0076	ABTJ_03767	ACICU_00068	ACIAD0064	A1S_0046	ABAYE3821	ABZJ_00071	ABSDF0059
BJ-AB0715_00087	BJ-AB0868_00086	BJ-AB07104_00085	AB57_0089	ABK1_0080	ABBFA_003463	ABTW07_0077	ABTJ_03766	ACICU_00069	ACIAD0065	A1S_0047	ABAYE3820	ABZJ_00072	ABSDF0061
BJ-AB0715_00088	BJ-AB0868_00087	BJ-AB07104_00086	AB57_0090	ABK1_0081	ABBFA_003462	ABTW07_0078	ABTJ_03765	ACICU_00070	ACIAD0066	A1S_0048	ABAYE3819	ABZJ_00073	ABSDF0062
BJ-AB0715_00091	BJ-AB0868_00089	BJ-AB07104_00088	AB57_0092	ABK1_0083	ABBFA_003460	ABTW07_0080	ABTJ_03763	ACICU_00072	ACIAD0069	A1S_0050	ABAYE3817	ABZJ_00075	ABSDF0064
BJ-AB0715_00111	BJ-AB0868_00106	BJ-AB07104_00102	AB57_0111	ABK1_0100	ABBFA_003449	ABTW07_0096	ABTJ_03747	ACICU_00088	ACIAD0099	A1S_0062	ABAYE3803	ABZJ_00093	ABSDF0079
BJ-AB0715_00113	BJ-AB0868_00108	BJ-AB07104_00104	AB57_0113	ABK1_0102	ABBFA_003447	ABTW07_0098	ABTJ_03745	ACICU_00090	ACIAD0101	A1S_0064	ABAYE3801	ABZJ_00095	ABSDF0081
BJ-AB0715_00115	BJ-AB0868_00110	BJ-AB07104_00106	AB57_0115	ABK1_0104	ABBFA_003446	ABTW07_0100	ABTJ_03743	ACICU_00092	ACIAD0104	A1S_0066	ABAYE3800	ABZJ_00097	ABSDF0083
BJ-AB0715_00117	BJ-AB0868_00113	BJ-AB07104_00109	AB57_0117	ABK1_0106	ABBFA_003444	ABTW07_0102	ABTJ_03741	ACICU_00094	ACIAD0107	A1S_0068	ABAYE3798	ABZJ_00100	ABSDF0086
BJ-AB0715_00118	BJ-AB0868_00114	BJ-AB07104_00110	AB57_0118	ABK1_0107	ABBFA_003443	ABTW07_0103	ABTJ_03740	ACICU_00095	ACIAD0108	A1S_0069	ABAYE3797	ABZJ_00101	ABSDF0087
BJ-AB0715_00119	BJ-AB0868_00116	BJ-AB07104_00111	AB57_0119	ABK1_0108	ABBFA_003442	ABTW07_0104	ABTJ_03739	ACICU_00096	ACIAD0109	A1S_0070	ABAYE3796	ABZJ_00102	ABSDF0088
BJ-AB0715_00120	BJ-AB0868_00117	BJ-AB07104_00112	AB57_0120	ABK1_0109	ABBFA_003441	ABTW07_0105	ABTJ_03738	ACICU_00097	ACIAD0112	A1S_0071	ABAYE3795	ABZJ_00103	ABSDF0089
BJ-AB0715_00122	BJ-AB0868_00120	BJ-AB07104_00114	AB57_0122	ABK1_0112	ABBFA_003439	ABTW07_0107	ABTJ_03736	ACICU_00099	ACIAD2758	A1S_0073	ABAYE3793	ABZJ_00105	ABSDF0091
BJ-AB0715_00124	BJ-AB0868_00122	BJ-AB07104_00116	AB57_0124	ABK1_0114	ABBFA_003437	ABTW07_0109	ABTJ_03734	ACICU_00101	ACIAD2755	A1S_0076	ABAYE3791	ABZJ_00107	ABSDF0093
BJ-AB0715_00139	BJ-AB0868_00133	BJ-AB07104_00127	AB57_0133	ABK1_0124	ABBFA_003427	ABTW07_0118	ABTJ_03719	ACICU_00118	ACIAD0716	A1S_0090	ABAYE3779	ABZJ_00119	ABSDF0111
BJ-AB0715_00141	BJ-AB0868_00135	BJ-AB07104_00129	AB57_0135	ABK1_0126	ABBFA_003425	ABTW07_0120	ABTJ_03717	ACICU_00120	ACIAD1003	A1S_0092	ABAYE3777	ABZJ_00121	ABSDF0113
BJ-AB0715_00142	BJ-AB0868_00136	BJ-AB07104_00130	AB57_0136	ABK1_0127	ABBFA_003424	ABTW07_0121	ABTJ_03716	ACICU_00121	ACIAD1004	A1S_0093	ABAYE3776	ABZJ_00122	ABSDF0114
BJ-AB0715_00144	BJ-AB0868_00138	BJ-AB07104_00132	AB57_0138	ABK1_0129	ABBFA_003422	ABTW07_0123	ABTJ_03714	ACICU_00123	ACIAD0115	A1S_0095	ABAYE3774	ABZJ_00124	ABSDF0116
BJ-AB0715_00145	BJ-AB0868_00139	BJ-AB07104_00133	AB57_0139	ABK1_0130	ABBFA_003421	ABTW07_0124	ABTJ_03713	ACICU_00124	ACIAD0116	A1S_0096	ABAYE3773	ABZJ_00125	ABSDF0117
BJ-AB0715_00149	BJ-AB0868_00143	BJ-AB07104_00137	AB57_0143	ABK1_0134	ABBFA_003417	ABTW07_0128	ABTJ_03709	ACICU_00128	ACIAD1602	A1S_0100	ABAYE3769	ABZJ_00130	ABSDF0120
BJ-AB0715_00152	BJ-AB0868_00147	BJ-AB07104_00140	AB57_0146	ABK1_0137	ABBFA_003414	ABTW07_0131	ABTJ_03706	ACICU_00131	ACIAD1606	A1S_0104	ABAYE3766	ABZJ_00133	ABSDF0123
BJ-AB0715_00153	BJ-AB0868_00148	BJ-AB07104_00141	AB57_0147	ABK1_0138	ABBFA_003413	ABTW07_0132	ABTJ_03705	ACICU_00132	ACIAD1607	A1S_0105	ABAYE3765	ABZJ_00134	ABSDF0124
BJ-AB0715_00155	BJ-AB0868_00150	BJ-AB07104_00143	AB57_0149	ABK1_0140	ABBFA_003411	ABTW07_0134	ABTJ_03703	ACICU_00134	ACIAD1609	A1S_0107	ABAYE3763	ABZJ_00136	ABSDF0127
BJ-AB0715_00169	BJ-AB0868_00164	BJ-AB07104_00157	AB57_0162	ABK1_0155	ABBFA_003396	ABTW07_0147	ABTJ_03681	ACICU_00147	ACIAD0142	A1S_0122	ABAYE3748	ABZJ_00149	ABSDF0134
BJ-AB0715_00170	BJ-AB0868_00165	BJ-AB07104_00158	AB57_0163	ABK1_0156	ABBFA_003395	ABTW07_0148	ABTJ_03680	ACICU_00148	ACIAD0143	A1S_0123	ABAYE3747	ABZJ_00150	ABSDF0135
BJ-AB0715_00172	BJ-AB0868_00167	BJ-AB07104_00160	AB57_0165	ABK1_0158	ABBFA_003393	ABTW07_0150	ABTJ_03678	ACICU_00150	ACIAD0145	A1S_0125	ABAYE3745	ABZJ_00152	ABSDF0137
BJ-AB0715_00177	BJ-AB0868_00172	BJ-AB07104_00165	AB57_0170	ABK1_0163	ABBFA_003388	ABTW07_0155	ABTJ_03673	ACICU_00155	ACIAD0151	A1S_0130	ABAYE3740	ABZJ_00157	ABSDF0144
BJ-AB0715_00180	BJ-AB0868_00175	BJ-AB07104_00168	AB57_0173	ABK1_0166	ABBFA_003385	ABTW07_0158	ABTJ_03670	ACICU_00158	ACIAD0155	A1S_0133	ABAYE3737	ABZJ_00160	ABSDF0147
BJ-AB0715_00181	BJ-AB0868_00176	BJ-AB07104_00169	AB57_0174	ABK1_0167	ABBFA_003384	ABTW07_0159	ABTJ_03669	ACICU_00159	ACIAD0157	A1S_0134	ABAYE3736	ABZJ_00161	ABSDF0148
BJ-AB0715_00184	BJ-AB0868_00179	BJ-AB07104_00172	AB57_0177	ABK1_0170	ABBFA_003381	ABTW07_0162	ABTJ_03666	ACICU_00162	ACIAD0163	A1S_0137	ABAYE3733	ABZJ_00164	ABSDF0153
BJ-AB0715_00190	BJ-AB0868_00185	BJ-AB07104_00178	AB57_0182	ABK1_0176	ABBFA_003376	ABTW07_0167	ABTJ_03661	ACICU_00167	ACIAD0174	A1S_0143	ABAYE3728	ABZJ_00170	ABSDF0157
BJ-AB0715_00192	BJ-AB0868_00187	BJ-AB07104_00180	AB57_0184	ABK1_0178	ABBFA_003374	ABTW07_0169	ABTJ_03659	ACICU_00169	ACIAD0176	A1S_0145	ABAYE3726	ABZJ_00172	ABSDF0159
BJ-AB0715_00194	BJ-AB0868_00189	BJ-AB07104_00184	AB57_0186	ABK1_0180	ABBFA_003372	ABTW07_0171	ABTJ_03657	ACICU_00171	ACIAD0178	A1S_0147	ABAYE3724	ABZJ_00174	ABSDF0161
BJ-AB0715_00195	BJ-AB0868_00190	BJ-AB07104_00185	AB57_0187	ABK1_0181	ABBFA_003371	ABTW07_0172	ABTJ_03656	ACICU_00172	ACIAD0180	A1S_0148	ABAYE3723	ABZJ_00175	ABSDF0163
BJ-AB0715_00196	BJ-AB0868_00191	BJ-AB07104_00186	AB57_0188	ABK1_0182	ABBFA_003370	ABTW07_0173	ABTJ_03655	ACICU_00173	ACIAD0182	A1S_0150	ABAYE3721	ABZJ_00177	ABSDF0165
BJ-AB0715_00197	BJ-AB0868_00192	BJ-AB07104_00187	AB57_0189	ABK1_0183	ABBFA_003369	ABTW07_0174	ABTJ_03654	ACICU_00174	ACIAD0183	A1S_0151	ABAYE3720	ABZJ_00178	ABSDF0166
BJ-AB0715_00198	BJ-AB0868_00193	BJ-AB07104_00188	AB57_0190	ABK1_0184	ABBFA_003368	ABTW07_0175	ABTJ_03653	ACICU_00175	ACIAD0184	A1S_0152	ABAYE3719	ABZJ_00179	ABSDF0167
BJ-AB0715_00199	BJ-AB0868_00194	BJ-AB07104_00189	AB57_0191	ABK1_0185	ABBFA_003367	ABTW07_0176	ABTJ_03652	ACICU_00176	ACIAD0185	A1S_0153	ABAYE3718	ABZJ_00180	ABSDF0168
BJ-AB0715_00200	BJ-AB0868_00195	BJ-AB07104_00190	AB57_0192	ABK1_0186	ABBFA_003366	ABTW07_0177	ABTJ_03651	ACICU_00177	ACIAD0186	A1S_0154	ABAYE3717	ABZJ_00181	ABSDF0169
BJ-AB0715_00201	BJ-AB0868_00196	BJ-AB07104_00191	AB57_0193	ABK1_0187	ABBFA_003365	ABTW07_0178	ABTJ_03650	ACICU_00178	ACIAD0187	A1S_0155	ABAYE3716	ABZJ_00182	ABSDF0170
BJ-AB0715_00202	BJ-AB0868_00197	BJ-AB07104_00192	AB57_0194	ABK1_0188	ABBFA_003364	ABTW07_0179	ABTJ_03649	ACICU_00179	ACIAD0188	A1S_0156	ABAYE3715	ABZJ_00183	ABSDF0171
BJ-AB0715_00205	BJ-AB0868_00199	BJ-AB07104_00194	AB57_0196	ABK1_0190	ABBFA_003362	ABTW07_0181	ABTJ_03647	ACICU_00182	ACIAD0193	A1S_0159	ABAYE3713	ABZJ_00185	ABSDF0175
BJ-AB0715_00207	BJ-AB0868_00201	BJ-AB07104_00196	AB57_0198	ABK1_0192	ABBFA_003360	ABTW07_0183	ABTJ_03645	ACICU_00184	ACIAD0195	A1S_0161	ABAYE3711	ABZJ_00187	ABSDF0177
BJ-AB0715_00210	BJ-AB0868_00204	BJ-AB07104_00199	AB57_0201	ABK1_0195	ABBFA_003357	ABTW07_0186	ABTJ_03642	ACICU_00187	ACIAD0208	A1S_0165	ABAYE3708	ABZJ_00190	ABSDF0180
BJ-AB0715_00212	BJ-AB0868_00206	BJ-AB07104_00201	AB57_0203	ABK1_0197	ABBFA_003355	ABTW07_0188	ABTJ_03640	ACICU_00189	ACIAD0210	A1S_0167	ABAYE3706	ABZJ_00192	ABSDF0184
BJ-AB0715_00213	BJ-AB0868_00207	BJ-AB07104_00202	AB57_0204	ABK1_0198	ABBFA_003354	ABTW07_0189	ABTJ_03639	ACICU_00190	ACIAD0211	A1S_0168	ABAYE3705	ABZJ_00193	ABSDF0185
BJ-AB0715_00215	BJ-AB0868_00209	BJ-AB07104_00204	AB57_0206	ABK1_0200	ABBFA_003352	ABTW07_0191	ABTJ_03637	ACICU_00192	ACIAD0214	A1S_0170	ABAYE3703	ABZJ_00195	ABSDF0187
BJ-AB0715_00217	BJ-AB0868_00211	BJ-AB07104_00206	AB57_0208	ABK1_0202	ABBFA_003350	ABTW07_0193	ABTJ_03635	ACICU_00194	ACIAD0216	A1S_0172	ABAYE3701	ABZJ_00197	ABSDF0189
BJ-AB0715_00224	BJ-AB0868_00218	BJ-AB07104_00212	AB57_0214	ABK1_0206	ABBFA_003342	ABTW07_0198	ABTJ_03625	ACICU_00198	ACIAD1663	A1S_0178	ABAYE3695	ABZJ_00201	ABSDF0202
BJ-AB0715_00229	BJ-AB0868_00223	BJ-AB07104_00217	AB57_0220	ABK1_0211	ABBFA_003337	ABTW07_0203	ABTJ_03620	ACICU_00203	ACIAD0220	A1S_0183	ABAYE3690	ABZJ_00206	ABSDF0205
BJ-AB0715_00231	BJ-AB0868_00225	BJ-AB07104_00219	AB57_0222	ABK1_0213	ABBFA_003335	ABTW07_0205	ABTJ_03618	ACICU_00205	ACIAD0222	A1S_0185	ABAYE3688	ABZJ_00208	ABSDF0207
BJ-AB0715_00234	BJ-AB0868_00228	BJ-AB07104_00222	AB57_0226	ABK1_0216	ABBFA_003332	ABTW07_0208	ABTJ_03615	ACICU_00208	ACIAD0228	A1S_0188	ABAYE3685	ABZJ_00211	ABSDF0210
BJ-AB0715_00237	BJ-AB0868_00231	BJ-AB07104_00225	AB57_0228	ABK1_0219	ABBFA_003330	ABTW07_0210	ABTJ_03613	ACICU_00210	ACIAD0230	A1S_0190	ABAYE3683	ABZJ_00214	ABSDF0213
BJ-AB0715_00239	BJ-AB0868_00233	BJ-AB07104_00227	AB57_0230	ABK1_0221	ABBFA_003328	ABTW07_0212	ABTJ_03611	ACICU_00212	ACIAD0232	A1S_0192	ABAYE3681	ABZJ_00216	ABSDF0215
BJ-AB0715_00240	BJ-AB0868_00234	BJ-AB07104_00228	AB57_0231	ABK1_0222	ABBFA_003327	ABTW07_0213	ABTJ_03610	ACICU_00213	ACIAD0233	A1S_0193	ABAYE3680	ABZJ_00217	ABSDF0216
BJ-AB0715_00243	BJ-AB0868_00237	BJ-AB07104_00231	AB57_0234	ABK1_0225	ABBFA_003324	ABTW07_0216	ABTJ_03607	ACICU_00216	ACIAD0236	A1S_0198	ABAYE3677	ABZJ_00220	ABSDF0219
BJ-AB0715_00244	BJ-AB0868_00238	BJ-AB07104_00232	AB57_0235	ABK1_0226	ABBFA_003323	ABTW07_0217	ABTJ_03606	ACICU_00217	ACIAD0237	A1S_0199	ABAYE3676	ABZJ_00221	ABSDF0221
BJ-AB0715_00246	BJ-AB0868_00240	BJ-AB07104_00234	AB57_0237	ABK1_0228	ABBFA_003321	ABTW07_0219	ABTJ_03604	ACICU_00219	ACIAD0240	A1S_0201	ABAYE3674	ABZJ_00223	ABSDF0223
BJ-AB0715_00268	BJ-AB0868_00386	BJ-AB07104_00286	AB57_0309	ABK1_0270	ABBFA_003313	ABTW07_0273	ABTJ_03554	ACICU_00243	ACIAD0244	A1S_0218	ABAYE3549	ABZJ_00270	ABSDF3317
BJ-AB0715_00269	BJ-AB0868_00387	BJ-AB07104_00287	AB57_0310	ABK1_0271	ABBFA_003312	ABTW07_0274	ABTJ_03553	ACICU_00244	ACIAD0245	A1S_0219	ABAYE3548	ABZJ_00271	ABSDF3316
BJ-AB0715_00272	BJ-AB0868_00390	BJ-AB07104_00290	AB57_0313	ABK1_0274	ABBFA_003309	ABTW07_0277	ABTJ_03550	ACICU_00247	ACIAD0248	A1S_0222	ABAYE3545	ABZJ_00274	ABSDF3313
BJ-AB0715_00273	BJ-AB0868_00391	BJ-AB07104_00291	AB57_0314	ABK1_0275	ABBFA_003308	ABTW07_0278	ABTJ_03549	ACICU_00248	ACIAD0249	A1S_0223	ABAYE3544	ABZJ_00275	ABSDF3312
BJ-AB0715_00274	BJ-AB0868_00392	BJ-AB07104_00292	AB57_0315	ABK1_0276	ABBFA_003307	ABTW07_0279	ABTJ_03548	ACICU_00249	ACIAD0250	A1S_0224	ABAYE3543	ABZJ_00276	ABSDF3311
BJ-AB0715_00275	BJ-AB0868_00393	BJ-AB07104_00293	AB57_0316	ABK1_0277	ABBFA_003306	ABTW07_0280	ABTJ_03547	ACICU_00250	ACIAD0251	A1S_0225	ABAYE3542	ABZJ_00277	ABSDF3310
BJ-AB0715_00277	BJ-AB0868_00395	BJ-AB07104_00295	AB57_0318	ABK1_0279	ABBFA_003304	ABTW07_0282	ABTJ_03545	ACICU_00252	ACIAD0253	A1S_0227	ABAYE3540	ABZJ_00279	ABSDF3308
BJ-AB0715_00278	BJ-AB0868_00396	BJ-AB07104_00296	AB57_0319	ABK1_0280	ABBFA_003302	ABTW07_0283	ABTJ_03544	ACICU_00253	ACIAD0254	A1S_0228	ABAYE3539	ABZJ_00280	ABSDF3307
BJ-AB0715_00280	BJ-AB0868_00398	BJ-AB07104_00298	AB57_0321	ABK1_0282	ABBFA_003300	ABTW07_0285	ABTJ_03542	ACICU_00255	ACIAD0256	A1S_0230	ABAYE3537	ABZJ_00282	ABSDF3305
BJ-AB0715_00281	BJ-AB0868_00399	BJ-AB07104_00299	AB57_0322	ABK1_0283	ABBFA_003299	ABTW07_0286	ABTJ_03541	ACICU_00256	ACIAD0257	A1S_0231	ABAYE3536	ABZJ_00283	ABSDF3304
BJ-AB0715_00284	BJ-AB0868_00402	BJ-AB07104_00302	AB57_0325	ABK1_0286	ABBFA_003296	ABTW07_0289	ABTJ_03538	ACICU_00259	ACIAD0260	A1S_0236	ABAYE3533	ABZJ_00286	ABSDF3297
BJ-AB0715_00286	BJ-AB0868_00404	BJ-AB07104_00304	AB57_0327	ABK1_0288	ABBFA_003294	ABTW07_0291	ABTJ_03536	ACICU_00261	ACIAD0263	A1S_0238	ABAYE3531	ABZJ_00288	ABSDF3295
BJ-AB0715_00287	BJ-AB0868_00405	BJ-AB07104_00305	AB57_0328	ABK1_0289	ABBFA_003293	ABTW07_0292	ABTJ_03535	ACICU_00262	ACIAD0264	A1S_0239	ABAYE3530	ABZJ_00289	ABSDF3294
BJ-AB0715_00289	BJ-AB0868_00407	BJ-AB07104_00307	AB57_0330	ABK1_0291	ABBFA_003291	ABTW07_0294	ABTJ_03533	ACICU_00264	ACIAD0266	A1S_0241	ABAYE3528	ABZJ_00291	ABSDF3292
BJ-AB0715_00290	BJ-AB0868_00408	BJ-AB07104_00308	AB57_0331	ABK1_0292	ABBFA_003290	ABTW07_0295	ABTJ_03532	ACICU_00265	ACIAD0267	A1S_0242	ABAYE3527	ABZJ_00292	ABSDF3291
BJ-AB0715_00291	BJ-AB0868_00409	BJ-AB07104_00309	AB57_0332	ABK1_0293	ABBFA_003289	ABTW07_0296	ABTJ_03531	ACICU_00266	ACIAD0268	A1S_0243	ABAYE3526	ABZJ_00293	ABSDF3290
BJ-AB0715_00292	BJ-AB0868_00410	BJ-AB07104_00310	AB57_0333	ABK1_0294	ABBFA_003288	ABTW07_0297	ABTJ_03530	ACICU_00267	ACIAD0269	A1S_0244	ABAYE3525	ABZJ_00294	ABSDF3289
BJ-AB0715_00293	BJ-AB0868_00411	BJ-AB07104_00311	AB57_0334	ABK1_0295	ABBFA_003287	ABTW07_0298	ABTJ_03529	ACICU_00268	ACIAD0270	A1S_0245	ABAYE3524	ABZJ_00295	ABSDF3288
BJ-AB0715_00294	BJ-AB0868_00412	BJ-AB07104_00312	AB57_0335	ABK1_0296	ABBFA_003286	ABTW07_0299	ABTJ_03528	ACICU_00269	ACIAD0271	A1S_0246	ABAYE3523	ABZJ_00296	ABSDF3287
BJ-AB0715_00297	BJ-AB0868_00415	BJ-AB07104_00315	AB57_0338	ABK1_0299	ABBFA_003283	ABTW07_0302	ABTJ_03525	ACICU_00272	ACIAD0274	A1S_0249	ABAYE3520	ABZJ_00299	ABSDF3283
BJ-AB0715_00299	BJ-AB0868_00417	BJ-AB07104_00317	AB57_0340	ABK1_0301	ABBFA_003281	ABTW07_0304	ABTJ_03523	ACICU_00274	ACIAD0276	A1S_0251	ABAYE3518	ABZJ_00301	ABSDF3281
BJ-AB0715_00303	BJ-AB0868_00421	BJ-AB07104_00321	AB57_0344	ABK1_0305	ABBFA_003277	ABTW07_0308	ABTJ_03518	ACICU_00278	ACIAD0278	A1S_0255	ABAYE3514	ABZJ_00305	ABSDF3274
BJ-AB0715_00304	BJ-AB0868_00422	BJ-AB07104_00322	AB57_0345	ABK1_0306	ABBFA_003276	ABTW07_0309	ABTJ_03517	ACICU_00279	ACIAD0279	A1S_0256	ABAYE3513	ABZJ_00306	ABSDF3273
BJ-AB0715_00308	BJ-AB0868_00426	BJ-AB07104_00326	AB57_0349	ABK1_0310	ABBFA_003272	ABTW07_0313	ABTJ_03513	ACICU_00283	ACIAD0285	A1S_0261	ABAYE3509	ABZJ_00310	ABSDF3261
BJ-AB0715_00312	BJ-AB0868_00430	BJ-AB07104_00330	AB57_0353	ABK1_0314	ABBFA_003268	ABTW07_0317	ABTJ_03509	ACICU_00287	ACIAD0289	A1S_0266	ABAYE3505	ABZJ_00314	ABSDF3265
BJ-AB0715_00313	BJ-AB0868_00431	BJ-AB07104_00331	AB57_0354	ABK1_0315	ABBFA_003267	ABTW07_0318	ABTJ_03508	ACICU_00288	ACIAD0290	A1S_0267	ABAYE3504	ABZJ_00315	ABSDF3266
BJ-AB0715_00315	BJ-AB0868_00432	BJ-AB07104_00332	AB57_0355	ABK1_0316	ABBFA_003266	ABTW07_0319	ABTJ_03507	ACICU_00289	ACIAD0291	A1S_0268	ABAYE3503	ABZJ_00316	ABSDF3267
BJ-AB0715_00317	BJ-AB0868_00434	BJ-AB07104_00334	AB57_0357	ABK1_0318	ABBFA_003265	ABTW07_0321	ABTJ_03505	ACICU_00291	ACIAD0293	A1S_0270	ABAYE3501	ABZJ_00318	ABSDF3256
BJ-AB0715_00318	BJ-AB0868_00435	BJ-AB07104_00335	AB57_0358	ABK1_0319	ABBFA_003264	ABTW07_0322	ABTJ_03504	ACICU_00292	ACIAD0294	A1S_0271	ABAYE3500	ABZJ_00319	ABSDF3255
BJ-AB0715_00319	BJ-AB0868_00436	BJ-AB07104_00336	AB57_0359	ABK1_0320	ABBFA_003263	ABTW07_0323	ABTJ_03503	ACICU_00293	ACIAD0295	A1S_0272	ABAYE3499	ABZJ_00320	ABSDF3254
BJ-AB0715_00320	BJ-AB0868_00437	BJ-AB07104_00337	AB57_0360	ABK1_0321	ABBFA_003262	ABTW07_0324	ABTJ_03502	ACICU_00294	ACIAD0296	A1S_0273	ABAYE3498	ABZJ_00321	ABSDF3253
BJ-AB0715_00323	BJ-AB0868_00440	BJ-AB07104_00340	AB57_0363	ABK1_0324	ABBFA_003254	ABTW07_0327	ABTJ_03494	ACICU_00297	ACIAD0300	A1S_0281	ABAYE3495	ABZJ_00324	ABSDF3249
BJ-AB0715_00324	BJ-AB0868_00441	BJ-AB07104_00341	AB57_0364	ABK1_0325	ABBFA_003253	ABTW07_0328	ABTJ_03493	ACICU_00298	ACIAD0301	A1S_0282	ABAYE3494	ABZJ_00325	ABSDF3248
BJ-AB0715_00326	BJ-AB0868_00443	BJ-AB07104_00343	AB57_0366	ABK1_0327	ABBFA_003251	ABTW07_0330	ABTJ_03491	ACICU_00300	ACIAD0304	A1S_0284	ABAYE3492	ABZJ_00327	ABSDF3246
BJ-AB0715_00328	BJ-AB0868_00445	BJ-AB07104_00345	AB57_0368	ABK1_0329	ABBFA_003249	ABTW07_0332	ABTJ_03489	ACICU_00302	ACIAD0306	A1S_0286	ABAYE3490	ABZJ_00329	ABSDF3244
BJ-AB0715_00329	BJ-AB0868_00446	BJ-AB07104_00346	AB57_0369	ABK1_0330	ABBFA_003248	ABTW07_0333	ABTJ_03488	ACICU_00303	ACIAD0307	A1S_0287	ABAYE3489	ABZJ_00330	ABSDF3243
BJ-AB0715_00330	BJ-AB0868_00447	BJ-AB07104_00347	AB57_0370	ABK1_0331	ABBFA_003247	ABTW07_0334	ABTJ_03487	ACICU_00304	ACIAD0308	A1S_0288	ABAYE3488	ABZJ_00331	ABSDF3242
BJ-AB0715_00335	BJ-AB0868_00452	BJ-AB07104_00352	AB57_0375	ABK1_0336	ABBFA_003242	ABTW07_0339	ABTJ_03482	ACICU_00309	ACIAD0313	A1S_0291	ABAYE3483	ABZJ_00336	ABSDF3235
BJ-AB0715_00336	BJ-AB0868_00453	BJ-AB07104_00353	AB57_0376	ABK1_0337	ABBFA_003241	ABTW07_0340	ABTJ_03481	ACICU_00310	ACIAD0314	A1S_0292	ABAYE3482	ABZJ_00337	ABSDF3234
BJ-AB0715_00337	BJ-AB0868_00454	BJ-AB07104_00354	AB57_0377	ABK1_0338	ABBFA_003240	ABTW07_0341	ABTJ_03480	ACICU_00311	ACIAD0315	A1S_0293	ABAYE3481	ABZJ_00338	ABSDF3233
BJ-AB0715_00340	BJ-AB0868_00457	BJ-AB07104_00357	AB57_0380	ABK1_0341	ABBFA_003237	ABTW07_0344	ABTJ_03477	ACICU_00314	ACIAD0324	A1S_0297	ABAYE3478	ABZJ_00341	ABSDF3229
BJ-AB0715_00342	BJ-AB0868_00459	BJ-AB07104_00359	AB57_0382	ABK1_0343	ABBFA_003235	ABTW07_0346	ABTJ_03475	ACICU_00316	ACIAD0332	A1S_0299	ABAYE3475	ABZJ_00343	ABSDF3226
BJ-AB0715_00346	BJ-AB0868_00463	BJ-AB07104_00363	AB57_0385	ABK1_0347	ABBFA_003232	ABTW07_0350	ABTJ_03471	ACICU_00320	ACIAD0333	A1S_0303	ABAYE3472	ABZJ_00347	ABSDF3222
BJ-AB0715_00347	BJ-AB0868_00464	BJ-AB07104_00364	AB57_0386	ABK1_0348	ABBFA_003231	ABTW07_0351	ABTJ_03470	ACICU_00321	ACIAD0334	A1S_0305	ABAYE3471	ABZJ_00348	ABSDF3221
BJ-AB0715_00349	BJ-AB0868_00466	BJ-AB07104_00366	AB57_0389	ABK1_0350	ABBFA_003228	ABTW07_0353	ABTJ_03468	ACICU_00323	ACIAD0337	A1S_0308	ABAYE3467	ABZJ_00350	ABSDF3218
BJ-AB0715_00351	BJ-AB0868_00469	BJ-AB07104_00369	AB57_0391	ABK1_0353	ABBFA_003226	ABTW07_0356	ABTJ_03464	ACICU_00326	ACIAD0340	A1S_0310	ABAYE3465	ABZJ_00354	ABSDF3216
BJ-AB0715_00352	BJ-AB0868_00470	BJ-AB07104_00370	AB57_0392	ABK1_0354	ABBFA_003225	ABTW07_0357	ABTJ_03463	ACICU_00327	ACIAD0341	A1S_0311	ABAYE3464	ABZJ_00355	ABSDF3215
BJ-AB0715_00353	BJ-AB0868_00471	BJ-AB07104_00371	AB57_0393	ABK1_0355	ABBFA_003224	ABTW07_0358	ABTJ_03462	ACICU_00328	ACIAD0342	A1S_0312	ABAYE3463	ABZJ_00356	ABSDF3214
BJ-AB0715_00357	BJ-AB0868_00475	BJ-AB07104_00375	AB57_0397	ABK1_0359	ABBFA_003220	ABTW07_0362	ABTJ_03458	ACICU_00332	ACIAD0349	A1S_0317	ABAYE3458	ABZJ_00360	ABSDF3205
BJ-AB0715_00359	BJ-AB0868_00477	BJ-AB07104_00377	AB57_0399	ABK1_0361	ABBFA_003219	ABTW07_0364	ABTJ_03456	ACICU_00334	ACIAD0351	A1S_0318	ABAYE3456	ABZJ_00362	ABSDF3203
BJ-AB0715_00360	BJ-AB0868_00478	BJ-AB07104_00378	AB57_0400	ABK1_0362	ABBFA_003218	ABTW07_0365	ABTJ_03455	ACICU_00335	ACIAD0352	A1S_0319	ABAYE3455	ABZJ_00363	ABSDF3202
BJ-AB0715_00361	BJ-AB0868_00479	BJ-AB07104_00379	AB57_0401	ABK1_0363	ABBFA_003217	ABTW07_0366	ABTJ_03454	ACICU_00336	ACIAD0353	A1S_0320	ABAYE3454	ABZJ_00364	ABSDF3201
BJ-AB0715_00362	BJ-AB0868_00480	BJ-AB07104_00380	AB57_0402	ABK1_0364	ABBFA_003216	ABTW07_0367	ABTJ_03453	ACICU_00337	ACIAD0354	A1S_0321	ABAYE3453	ABZJ_00365	ABSDF3200
BJ-AB0715_00363	BJ-AB0868_00481	BJ-AB07104_00381	AB57_0403	ABK1_0365	ABBFA_003215	ABTW07_0368	ABTJ_03452	ACICU_00338	ACIAD0355	A1S_0322	ABAYE3452	ABZJ_00366	ABSDF3199
BJ-AB0715_00365	BJ-AB0868_00483	BJ-AB07104_00383	AB57_0405	ABK1_0367	ABBFA_003213	ABTW07_0370	ABTJ_03450	ACICU_00340	ACIAD0357	A1S_0324	ABAYE3449	ABZJ_00368	ABSDF3197
BJ-AB0715_00366	BJ-AB0868_00484	BJ-AB07104_00384	AB57_0407	ABK1_0368	ABBFA_003212	ABTW07_0371	ABTJ_03449	ACICU_00341	ACIAD0358	A1S_0325	ABAYE3448	ABZJ_00369	ABSDF3196
BJ-AB0715_00368	BJ-AB0868_00486	BJ-AB07104_00386	AB57_0408	ABK1_0370	ABBFA_003210	ABTW07_0373	ABTJ_03447	ACICU_00343	ACIAD0360	A1S_0327	ABAYE3446	ABZJ_00371	ABSDF3194
BJ-AB0715_00371	BJ-AB0868_00489	BJ-AB07104_00389	AB57_0411	ABK1_0373	ABBFA_003206	ABTW07_0376	ABTJ_03444	ACICU_00346	ACIAD0363	A1S_0330	ABAYE3443	ABZJ_00374	ABSDF3187
BJ-AB0715_00372	BJ-AB0868_00490	BJ-AB07104_00390	AB57_0412	ABK1_0374	ABBFA_003205	ABTW07_0377	ABTJ_03443	ACICU_00347	ACIAD0364	A1S_0331	ABAYE3442	ABZJ_00375	ABSDF3186
BJ-AB0715_00373	BJ-AB0868_00491	BJ-AB07104_00391	AB57_0413	ABK1_0375	ABBFA_003201	ABTW07_0378	ABTJ_03439	ACICU_00348	ACIAD0367	A1S_0334	ABAYE3440	ABZJ_00376	ABSDF3182
BJ-AB0715_00374	BJ-AB0868_00492	BJ-AB07104_00392	AB57_0414	ABK1_0376	ABBFA_003200	ABTW07_0379	ABTJ_03438	ACICU_00349	ACIAD0368	A1S_0335	ABAYE3439	ABZJ_00377	ABSDF3181
BJ-AB0715_00377	BJ-AB0868_00495	BJ-AB07104_00395	AB57_0417	ABK1_0379	ABBFA_003197	ABTW07_0382	ABTJ_03435	ACICU_00352	ACIAD0371	A1S_0339	ABAYE3436	ABZJ_00380	ABSDF3178
BJ-AB0715_00382	BJ-AB0868_00500	BJ-AB07104_00401	AB57_0422	ABK1_0384	ABBFA_003192	ABTW07_0387	ABTJ_03430	ACICU_00357	ACIAD0376	A1S_0343	ABAYE3431	ABZJ_00384	ABSDF3173
BJ-AB0715_00383	BJ-AB0868_00501	BJ-AB07104_00402	AB57_0423	ABK1_0385	ABBFA_003191	ABTW07_0388	ABTJ_03429	ACICU_00358	ACIAD0378	A1S_0344	ABAYE3430	ABZJ_00385	ABSDF3172
BJ-AB0715_00384	BJ-AB0868_00502	BJ-AB07104_00403	AB57_0424	ABK1_0386	ABBFA_003190	ABTW07_0389	ABTJ_03428	ACICU_00359	ACIAD0379	A1S_0345	ABAYE3429	ABZJ_00386	ABSDF3171
BJ-AB0715_00385	BJ-AB0868_00503	BJ-AB07104_00404	AB57_0425	ABK1_0387	ABBFA_003189	ABTW07_0390	ABTJ_03427	ACICU_00360	ACIAD0380	A1S_0346	ABAYE3428	ABZJ_00387	ABSDF3170
BJ-AB0715_00387	BJ-AB0868_00505	BJ-AB07104_00406	AB57_0427	ABK1_0389	ABBFA_003186	ABTW07_0392	ABTJ_03425	ACICU_00362	ACIAD0382	A1S_0348	ABAYE3426	ABZJ_00389	ABSDF3166
BJ-AB0715_00388	BJ-AB0868_00506	BJ-AB07104_00407	AB57_0428	ABK1_0390	ABBFA_003185	ABTW07_0393	ABTJ_03424	ACICU_00363	ACIAD0383	A1S_0349	ABAYE3425	ABZJ_00390	ABSDF3165
BJ-AB0715_00389	BJ-AB0868_00507	BJ-AB07104_00408	AB57_0429	ABK1_0391	ABBFA_003184	ABTW07_0394	ABTJ_03423	ACICU_00364	ACIAD0384	A1S_0350	ABAYE3424	ABZJ_00391	ABSDF3164
BJ-AB0715_00390	BJ-AB0868_00508	BJ-AB07104_00409	AB57_0430	ABK1_0392	ABBFA_003183	ABTW07_0395	ABTJ_03422	ACICU_00365	ACIAD0385	A1S_0351	ABAYE3423	ABZJ_00392	ABSDF3163
BJ-AB0715_00394	BJ-AB0868_00512	BJ-AB07104_00413	AB57_0435	ABK1_0396	ABBFA_003179	ABTW07_0399	ABTJ_03418	ACICU_00369	ACIAD0398	A1S_0357	ABAYE3419	ABZJ_00396	ABSDF3159
BJ-AB0715_00395	BJ-AB0868_00513	BJ-AB07104_00414	AB57_0436	ABK1_0397	ABBFA_003178	ABTW07_0400	ABTJ_03417	ACICU_00370	ACIAD0399	A1S_0358	ABAYE3418	ABZJ_00397	ABSDF3158
BJ-AB0715_00396	BJ-AB0868_00514	BJ-AB07104_00415	AB57_0437	ABK1_0398	ABBFA_003177	ABTW07_0401	ABTJ_03416	ACICU_00371	ACIAD0400	A1S_0359	ABAYE3417	ABZJ_00398	ABSDF3157
BJ-AB0715_00398	BJ-AB0868_00516	BJ-AB07104_00416	AB57_0438	ABK1_0399	ABBFA_003176	ABTW07_0402	ABTJ_03415	ACICU_00372	ACIAD0401	A1S_0360	ABAYE3415	ABZJ_00400	ABSDF3155
BJ-AB0715_00399	BJ-AB0868_00517	BJ-AB07104_00417	AB57_0439	ABK1_0400	ABBFA_003175	ABTW07_0403	ABTJ_03414	ACICU_00373	ACIAD0402	A1S_0361	ABAYE3414	ABZJ_00401	ABSDF3154
BJ-AB0715_00400	BJ-AB0868_00518	BJ-AB07104_00418	AB57_0440	ABK1_0401	ABBFA_003174	ABTW07_0404	ABTJ_03413	ACICU_00374	ACIAD0403	A1S_0362	ABAYE3413	ABZJ_00402	ABSDF3152
BJ-AB0715_00403	BJ-AB0868_00521	BJ-AB07104_00421	AB57_0443	ABK1_0404	ABBFA_003171	ABTW07_0407	ABTJ_03410	ACICU_00377	ACIAD3166	A1S_0365	ABAYE3410	ABZJ_00405	ABSDF3147
BJ-AB0715_00404	BJ-AB0868_00522	BJ-AB07104_00422	AB57_0444	ABK1_0405	ABBFA_003170	ABTW07_0408	ABTJ_03409	ACICU_00378	ACIAD0407	A1S_0366	ABAYE3409	ABZJ_00406	ABSDF3146
BJ-AB0715_00405	BJ-AB0868_00523	BJ-AB07104_00423	AB57_0445	ABK1_0406	ABBFA_003169	ABTW07_0409	ABTJ_03408	ACICU_00379	ACIAD0408	A1S_0367	ABAYE3408	ABZJ_00407	ABSDF3145
BJ-AB0715_00406	BJ-AB0868_00524	BJ-AB07104_00424	AB57_0446	ABK1_0407	ABBFA_003168	ABTW07_0410	ABTJ_03407	ACICU_00380	ACIAD0409	A1S_0368	ABAYE3407	ABZJ_00408	ABSDF3144
BJ-AB0715_00407	BJ-AB0868_00525	BJ-AB07104_00425	AB57_0447	ABK1_0408	ABBFA_003167	ABTW07_0411	ABTJ_03406	ACICU_00381	ACIAD0411	A1S_0369	ABAYE3406	ABZJ_00409	ABSDF3143
BJ-AB0715_00408	BJ-AB0868_00526	BJ-AB07104_00426	AB57_0448	ABK1_0409	ABBFA_003166	ABTW07_0412	ABTJ_03405	ACICU_00382	ACIAD0412	A1S_0370	ABAYE3405	ABZJ_00410	ABSDF3142
BJ-AB0715_00411	BJ-AB0868_00529	BJ-AB07104_00429	AB57_0451	ABK1_0414	ABBFA_003163	ABTW07_0415	ABTJ_03402	ACICU_00385	ACIAD0415	A1S_0373	ABAYE3401	ABZJ_00413	ABSDF3138
BJ-AB0715_00412	BJ-AB0868_00530	BJ-AB07104_00430	AB57_0452	ABK1_0415	ABBFA_003162	ABTW07_0416	ABTJ_03401	ACICU_00386	ACIAD0416	A1S_0375	ABAYE3400	ABZJ_00414	ABSDF3137
BJ-AB0715_00413	BJ-AB0868_00531	BJ-AB07104_00431	AB57_0453	ABK1_0416	ABBFA_003161	ABTW07_0417	ABTJ_03400	ACICU_00387	ACIAD0417	A1S_0376	ABAYE3399	ABZJ_00415	ABSDF3136
BJ-AB0715_00416	BJ-AB0868_00533	BJ-AB07104_00433	AB57_0456	ABK1_0418	ABBFA_003158	ABTW07_0419	ABTJ_03398	ACICU_00389	ACIAD3258	A1S_0379	ABAYE3396	ABZJ_00417	ABSDF3132
BJ-AB0715_00417	BJ-AB0868_00534	BJ-AB07104_00434	AB57_0457	ABK1_0419	ABBFA_003157	ABTW07_0420	ABTJ_03397	ACICU_00390	ACIAD3257	A1S_0380	ABAYE3395	ABZJ_00418	ABSDF3131
BJ-AB0715_00420	BJ-AB0868_00537	BJ-AB07104_00437	AB57_0462	ABK1_0422	ABBFA_003154	ABTW07_0423	ABTJ_03394	ACICU_00393	ACIAD3254	A1S_0383	ABAYE3392	ABZJ_00421	ABSDF3127
BJ-AB0715_00421	BJ-AB0868_00538	BJ-AB07104_00438	AB57_0461	ABK1_0423	ABBFA_003153	ABTW07_0424	ABTJ_03393	ACICU_00394	ACIAD0419	A1S_0385	ABAYE3391	ABZJ_00422	ABSDF3126
BJ-AB0715_00423	BJ-AB0868_00540	BJ-AB07104_00440	AB57_0464	ABK1_0425	ABBFA_003151	ABTW07_0426	ABTJ_03391	ACICU_00396	ACIAD0421	A1S_0387	ABAYE3389	ABZJ_00424	ABSDF3124
BJ-AB0715_00424	BJ-AB0868_00541	BJ-AB07104_00441	AB57_0465	ABK1_0426	ABBFA_003150	ABTW07_0427	ABTJ_03390	ACICU_00397	ACIAD0422	A1S_0388	ABAYE3388	ABZJ_00425	ABSDF3123
BJ-AB0715_00425	BJ-AB0868_00542	BJ-AB07104_00442	AB57_0466	ABK1_0427	ABBFA_003149	ABTW07_0428	ABTJ_03389	ACICU_00398	ACIAD0404	A1S_0389	ABAYE3387	ABZJ_00426	ABSDF3122
BJ-AB0715_00426	BJ-AB0868_00543	BJ-AB07104_00443	AB57_0467	ABK1_0428	ABBFA_003148	ABTW07_0429	ABTJ_03388	ACICU_00399	ACIAD0424	A1S_0390	ABAYE3386	ABZJ_00427	ABSDF3121
BJ-AB0715_00427	BJ-AB0868_00544	BJ-AB07104_00444	AB57_0468	ABK1_0429	ABBFA_003147	ABTW07_0430	ABTJ_03387	ACICU_00400	ACIAD0425	A1S_0391	ABAYE3385	ABZJ_00428	ABSDF3120
BJ-AB0715_00428	BJ-AB0868_00545	BJ-AB07104_00445	AB57_0469	ABK1_0430	ABBFA_003146	ABTW07_0431	ABTJ_03386	ACICU_00401	ACIAD0426	A1S_0392	ABAYE3384	ABZJ_00429	ABSDF3119
BJ-AB0715_00431	BJ-AB0868_00548	BJ-AB07104_00448	AB57_0472	ABK1_0433	ABBFA_003143	ABTW07_0434	ABTJ_03383	ACICU_00404	ACIAD0429	A1S_0395	ABAYE3381	ABZJ_00432	ABSDF3116
BJ-AB0715_00432	BJ-AB0868_00549	BJ-AB07104_00449	AB57_0473	ABK1_0434	ABBFA_003142	ABTW07_0435	ABTJ_03382	ACICU_00405	ACIAD0431	A1S_0396	ABAYE3380	ABZJ_00433	ABSDF3115
BJ-AB0715_00433	BJ-AB0868_00550	BJ-AB07104_00450	AB57_0474	ABK1_0435	ABBFA_003141	ABTW07_0436	ABTJ_03381	ACICU_00406	ACIAD0432	A1S_0397	ABAYE3379	ABZJ_00434	ABSDF3114
BJ-AB0715_00436	BJ-AB0868_00553	BJ-AB07104_00453	AB57_0477	ABK1_0438	ABBFA_003136	ABTW07_0439	ABTJ_03376	ACICU_00409	ACIAD0437	A1S_0402	ABAYE3376	ABZJ_00437	ABSDF3111
BJ-AB0715_00437	BJ-AB0868_00554	BJ-AB07104_00454	AB57_0478	ABK1_0439	ABBFA_003135	ABTW07_0440	ABTJ_03375	ACICU_00410	ACIAD0438	A1S_0403	ABAYE3375	ABZJ_00438	ABSDF3110
BJ-AB0715_00447	BJ-AB0868_00563	BJ-AB07104_00464	AB57_0489	ABK1_0450	ABBFA_003124	ABTW07_0449	ABTJ_03366	ACICU_00419	ACIAD0454	A1S_0413	ABAYE3365	ABZJ_00449	ABSDF3103
BJ-AB0715_00448	BJ-AB0868_00564	BJ-AB07104_00465	AB57_0490	ABK1_0451	ABBFA_003123	ABTW07_0450	ABTJ_03365	ACICU_00420	ACIAD0455	A1S_0414	ABAYE3364	ABZJ_00450	ABSDF3102
BJ-AB0715_00449	BJ-AB0868_00565	BJ-AB07104_00466	AB57_0491	ABK1_0452	ABBFA_003122	ABTW07_0451	ABTJ_03364	ACICU_00421	ACIAD0456	A1S_0415	ABAYE3363	ABZJ_00451	ABSDF3101
BJ-AB0715_00452	BJ-AB0868_00568	BJ-AB07104_00469	AB57_0492	ABK1_0455	ABBFA_003121	ABTW07_0454	ABTJ_03361	ACICU_00423	ACIAD0461	A1S_0416	ABAYE3362	ABZJ_00454	ABSDF3100
BJ-AB0715_00454	BJ-AB0868_00570	BJ-AB07104_00471	AB57_0494	ABK1_0457	ABBFA_003119	ABTW07_0456	ABTJ_03359	ACICU_00425	ACIAD0463	A1S_0417	ABAYE3360	ABZJ_00456	ABSDF3098
BJ-AB0715_00455	BJ-AB0868_00571	BJ-AB07104_00472	AB57_0495	ABK1_0458	ABBFA_003118	ABTW07_0457	ABTJ_03358	ACICU_00426	ACIAD0466	A1S_0418	ABAYE3359	ABZJ_00457	ABSDF3097
BJ-AB0715_00456	BJ-AB0868_00572	BJ-AB07104_00473	AB57_0496	ABK1_0459	ABBFA_003117	ABTW07_0458	ABTJ_03357	ACICU_00427	ACIAD0468	A1S_0419	ABAYE3358	ABZJ_00458	ABSDF3096
BJ-AB0715_00457	BJ-AB0868_00573	BJ-AB07104_00474	AB57_0497	ABK1_0460	ABBFA_003116	ABTW07_0459	ABTJ_03356	ACICU_00428	ACIAD0469	A1S_0420	ABAYE3357	ABZJ_00459	ABSDF3095
BJ-AB0715_00460	BJ-AB0868_00576	BJ-AB07104_00477	AB57_0500	ABK1_0463	ABBFA_003113	ABTW07_0462	ABTJ_03353	ACICU_00431	ACIAD0472	A1S_0421	ABAYE3354	ABZJ_00462	ABSDF3092
BJ-AB0715_00463	BJ-AB0868_00579	BJ-AB07104_00480	AB57_0503	ABK1_0466	ABBFA_003110	ABTW07_0465	ABTJ_03350	ACICU_00434	ACIAD0476	A1S_0424	ABAYE3351	ABZJ_00465	ABSDF3089
BJ-AB0715_00466	BJ-AB0868_00582	BJ-AB07104_00483	AB57_0507	ABK1_0469	ABBFA_003107	ABTW07_0468	ABTJ_03347	ACICU_00437	ACIAD0479	A1S_0427	ABAYE3348	ABZJ_00468	ABSDF3085
BJ-AB0715_00467	BJ-AB0868_00583	BJ-AB07104_00484	AB57_0508	ABK1_0470	ABBFA_003106	ABTW07_0469	ABTJ_03346	ACICU_00438	ACIAD0480	A1S_0428	ABAYE3347	ABZJ_00469	ABSDF3084
BJ-AB0715_00468	BJ-AB0868_00584	BJ-AB07104_00485	AB57_0509	ABK1_0471	ABBFA_003105	ABTW07_0470	ABTJ_03345	ACICU_00439	ACIAD0481	A1S_0429	ABAYE3346	ABZJ_00470	ABSDF3083
BJ-AB0715_00469	BJ-AB0868_00585	BJ-AB07104_00486	AB57_0510	ABK1_0472	ABBFA_003104	ABTW07_0471	ABTJ_03344	ACICU_00440	ACIAD0482	A1S_0430	ABAYE3345	ABZJ_00471	ABSDF3082
BJ-AB0715_00470	BJ-AB0868_00586	BJ-AB07104_00487	AB57_0511	ABK1_0473	ABBFA_003103	ABTW07_0472	ABTJ_03343	ACICU_00441	ACIAD0484	A1S_0431	ABAYE3343	ABZJ_00472	ABSDF3081
BJ-AB0715_00471	BJ-AB0868_00587	BJ-AB07104_00488	AB57_0512	ABK1_0474	ABBFA_003102	ABTW07_0473	ABTJ_03342	ACICU_00442	ACIAD0486	A1S_0432	ABAYE3342	ABZJ_00473	ABSDF3080
BJ-AB0715_00473	BJ-AB0868_00589	BJ-AB07104_00490	AB57_0517	ABK1_0476	ABBFA_003100	ABTW07_0475	ABTJ_03340	ACICU_00444	ACIAD0488	A1S_0434	ABAYE3340	ABZJ_00475	ABSDF3078
BJ-AB0715_00477	BJ-AB0868_00593	BJ-AB07104_00494	AB57_0521	ABK1_0480	ABBFA_003096	ABTW07_0479	ABTJ_03336	ACICU_00448	ACIAD0493	A1S_0439	ABAYE3335	ABZJ_00479	ABSDF3073
BJ-AB0715_00480	BJ-AB0868_00596	BJ-AB07104_00497	AB57_0524	ABK1_0483	ABBFA_003093	ABTW07_0482	ABTJ_03333	ACICU_00451	ACIAD0495	A1S_0442	ABAYE3332	ABZJ_00482	ABSDF3070
BJ-AB0715_00481	BJ-AB0868_00597	BJ-AB07104_00498	AB57_0525	ABK1_0484	ABBFA_003092	ABTW07_0483	ABTJ_03332	ACICU_00452	ACIAD0496	A1S_0443	ABAYE3331	ABZJ_00483	ABSDF3069
BJ-AB0715_00484	BJ-AB0868_00600	BJ-AB07104_00501	AB57_0528	ABK1_0487	ABBFA_003089	ABTW07_0486	ABTJ_03329	ACICU_00455	ACIAD0499	A1S_0445	ABAYE3328	ABZJ_00486	ABSDF3066
BJ-AB0715_00485	BJ-AB0868_00601	BJ-AB07104_00502	AB57_0529	ABK1_0488	ABBFA_003088	ABTW07_0487	ABTJ_03328	ACICU_00456	ACIAD0500	A1S_0446	ABAYE3327	ABZJ_00487	ABSDF3065
BJ-AB0715_00486	BJ-AB0868_00602	BJ-AB07104_00503	AB57_0530	ABK1_0489	ABBFA_003087	ABTW07_0488	ABTJ_03327	ACICU_00457	ACIAD0501	A1S_0447	ABAYE3326	ABZJ_00488	ABSDF3064
BJ-AB0715_00487	BJ-AB0868_00603	BJ-AB07104_00504	AB57_0531	ABK1_0490	ABBFA_003086	ABTW07_0489	ABTJ_03326	ACICU_00458	ACIAD0502	A1S_0448	ABAYE3325	ABZJ_00489	ABSDF3063
BJ-AB0715_00488	BJ-AB0868_00604	BJ-AB07104_00505	AB57_0532	ABK1_0491	ABBFA_003085	ABTW07_0490	ABTJ_03325	ACICU_00459	ACIAD0503	A1S_0449	ABAYE3324	ABZJ_00490	ABSDF3062
BJ-AB0715_00492	BJ-AB0868_00608	BJ-AB07104_00509	AB57_0536	ABK1_0495	ABBFA_003081	ABTW07_0494	ABTJ_03321	ACICU_00463	ACIAD0508	A1S_0453	ABAYE3319	ABZJ_00494	ABSDF3057
BJ-AB0715_00493	BJ-AB0868_00609	BJ-AB07104_00510	AB57_0537	ABK1_0496	ABBFA_003080	ABTW07_0495	ABTJ_03320	ACICU_00464	ACIAD0509	A1S_0454	ABAYE3318	ABZJ_00495	ABSDF3056
BJ-AB0715_00495	BJ-AB0868_00611	BJ-AB07104_00512	AB57_0539	ABK1_0498	ABBFA_003078	ABTW07_0497	ABTJ_03318	ACICU_00466	ACIAD0513	A1S_0456	ABAYE3316	ABZJ_00497	ABSDF3054
BJ-AB0715_00496	BJ-AB0868_00612	BJ-AB07104_00513	AB57_0540	ABK1_0499	ABBFA_003077	ABTW07_0498	ABTJ_03317	ACICU_00467	ACIAD0514	A1S_0457	ABAYE3315	ABZJ_00498	ABSDF3053
BJ-AB0715_00497	BJ-AB0868_00613	BJ-AB07104_00514	AB57_0541	ABK1_0500	ABBFA_003076	ABTW07_0499	ABTJ_03316	ACICU_00468	ACIAD0515	A1S_0458	ABAYE3314	ABZJ_00499	ABSDF3052
BJ-AB0715_00500	BJ-AB0868_00616	BJ-AB07104_00517	AB57_0544	ABK1_0503	ABBFA_003073	ABTW07_0501	ABTJ_03313	ACICU_00471	ACIAD0518	A1S_0460	ABAYE3311	ABZJ_00502	ABSDF3048
BJ-AB0715_00501	BJ-AB0868_00617	BJ-AB07104_00518	AB57_0545	ABK1_0504	ABBFA_003072	ABTW07_0502	ABTJ_03312	ACICU_00472	ACIAD0519	A1S_0461	ABAYE3310	ABZJ_00503	ABSDF3047
BJ-AB0715_00503	BJ-AB0868_00619	BJ-AB07104_00520	AB57_0567	ABK1_0506	ABBFA_003070	ABTW07_0504	ABTJ_03310	ACICU_00474	ACIAD0520	A1S_0463	ABAYE3308	ABZJ_00505	ABSDF3043
BJ-AB0715_00505	BJ-AB0868_00621	BJ-AB07104_00522	AB57_0569	ABK1_0508	ABBFA_003068	ABTW07_0506	ABTJ_03308	ACICU_00476	ACIAD0522	A1S_0465	ABAYE3299	ABZJ_00507	ABSDF3041
BJ-AB0715_00506	BJ-AB0868_00622	BJ-AB07104_00523	AB57_0570	ABK1_0509	ABBFA_003067	ABTW07_0507	ABTJ_03307	ACICU_00477	ACIAD0523	A1S_0466	ABAYE3298	ABZJ_00508	ABSDF3040
BJ-AB0715_00507	BJ-AB0868_00623	BJ-AB07104_00524	AB57_0571	ABK1_0510	ABBFA_003066	ABTW07_0508	ABTJ_03306	ACICU_00478	ACIAD0524	A1S_0467	ABAYE3297	ABZJ_00509	ABSDF3039
BJ-AB0715_00510	BJ-AB0868_00625	BJ-AB07104_00526	AB57_0573	ABK1_0512	ABBFA_003064	ABTW07_0510	ABTJ_03304	ACICU_00480	ACIAD0527	A1S_0469	ABAYE3295	ABZJ_00511	ABSDF3035
BJ-AB0715_00511	BJ-AB0868_00626	BJ-AB07104_00527	AB57_0574	ABK1_0513	ABBFA_003063	ABTW07_0511	ABTJ_03303	ACICU_00481	ACIAD0528	A1S_0470	ABAYE3294	ABZJ_00512	ABSDF3034
BJ-AB0715_00512	BJ-AB0868_00627	BJ-AB07104_00528	AB57_0575	ABK1_0514	ABBFA_003062	ABTW07_0512	ABTJ_03302	ACICU_00482	ACIAD0529	A1S_0471	ABAYE3293	ABZJ_00513	ABSDF3033
BJ-AB0715_00513	BJ-AB0868_00628	BJ-AB07104_00529	AB57_0576	ABK1_0515	ABBFA_003061	ABTW07_0513	ABTJ_03301	ACICU_00483	ACIAD0530	A1S_0472	ABAYE3292	ABZJ_00514	ABSDF3032
BJ-AB0715_00514	BJ-AB0868_00629	BJ-AB07104_00530	AB57_0577	ABK1_0516	ABBFA_003060	ABTW07_0514	ABTJ_03300	ACICU_00484	ACIAD0531	A1S_0473	ABAYE3291	ABZJ_00515	ABSDF3031
BJ-AB0715_00515	BJ-AB0868_00630	BJ-AB07104_00531	AB57_0578	ABK1_0517	ABBFA_003059	ABTW07_0515	ABTJ_03299	ACICU_00485	ACIAD0532	A1S_0474	ABAYE3290	ABZJ_00516	ABSDF3030
BJ-AB0715_00518	BJ-AB0868_00633	BJ-AB07104_00534	AB57_0581	ABK1_0520	ABBFA_003056	ABTW07_0518	ABTJ_03296	ACICU_00488	ACIAD0535	A1S_0477	ABAYE3287	ABZJ_00519	ABSDF3027
BJ-AB0715_00519	BJ-AB0868_00634	BJ-AB07104_00535	AB57_0582	ABK1_0521	ABBFA_003055	ABTW07_0519	ABTJ_03295	ACICU_00489	ACIAD0536	A1S_0478	ABAYE3286	ABZJ_00520	ABSDF3026
BJ-AB0715_00521	BJ-AB0868_00636	BJ-AB07104_00537	AB57_0584	ABK1_0523	ABBFA_003053	ABTW07_0521	ABTJ_03293	ACICU_00491	ACIAD0538	A1S_0480	ABAYE3284	ABZJ_00522	ABSDF3024
BJ-AB0715_00524	BJ-AB0868_00639	BJ-AB07104_00540	AB57_0587	ABK1_0526	ABBFA_003050	ABTW07_0524	ABTJ_03290	ACICU_00494	ACIAD0542	A1S_0483	ABAYE3281	ABZJ_00525	ABSDF3021
BJ-AB0715_00525	BJ-AB0868_00640	BJ-AB07104_00541	AB57_0588	ABK1_0527	ABBFA_003049	ABTW07_0525	ABTJ_03289	ACICU_00495	ACIAD0543	A1S_0484	ABAYE3280	ABZJ_00527	ABSDF3020
BJ-AB0715_00526	BJ-AB0868_00641	BJ-AB07104_00542	AB57_0589	ABK1_0528	ABBFA_003048	ABTW07_0526	ABTJ_03288	ACICU_00496	ACIAD0544	A1S_0485	ABAYE3279	ABZJ_00528	ABSDF3019
BJ-AB0715_00529	BJ-AB0868_00644	BJ-AB07104_00545	AB57_0592	ABK1_0531	ABBFA_003045	ABTW07_0529	ABTJ_03285	ACICU_00499	ACIAD0547	A1S_0489	ABAYE3276	ABZJ_00531	ABSDF3014
BJ-AB0715_00531	BJ-AB0868_00645	BJ-AB07104_00546	AB57_0593	ABK1_0532	ABBFA_003044	ABTW07_0530	ABTJ_03284	ACICU_00500	ACIAD0549	A1S_0490	ABAYE3274	ABZJ_00532	ABSDF3013
BJ-AB0715_00532	BJ-AB0868_00646	BJ-AB07104_00547	AB57_0594	ABK1_0533	ABBFA_003043	ABTW07_0531	ABTJ_03283	ACICU_00501	ACIAD0550	A1S_0491	ABAYE3273	ABZJ_00533	ABSDF3012
BJ-AB0715_00533	BJ-AB0868_00647	BJ-AB07104_00548	AB57_0595	ABK1_0534	ABBFA_003042	ABTW07_0532	ABTJ_03282	ACICU_00502	ACIAD0551	A1S_0492	ABAYE3272	ABZJ_00534	ABSDF3011
BJ-AB0715_00534	BJ-AB0868_00648	BJ-AB07104_00549	AB57_0596	ABK1_0535	ABBFA_003041	ABTW07_0533	ABTJ_03281	ACICU_00503	ACIAD0552	A1S_0493	ABAYE3271	ABZJ_00535	ABSDF3010
BJ-AB0715_00539	BJ-AB0868_00653	BJ-AB07104_00554	AB57_0601	ABK1_0540	ABBFA_003036	ABTW07_0538	ABTJ_03276	ACICU_00508	ACIAD0557	A1S_0499	ABAYE3266	ABZJ_00540	ABSDF3005
BJ-AB0715_00541	BJ-AB0868_00655	BJ-AB07104_00556	AB57_0603	ABK1_0542	ABBFA_003034	ABTW07_0540	ABTJ_03274	ACICU_00510	ACIAD0560	A1S_0501	ABAYE3264	ABZJ_00542	ABSDF3002
BJ-AB0715_00542	BJ-AB0868_00656	BJ-AB07104_00557	AB57_0604	ABK1_0543	ABBFA_003033	ABTW07_0541	ABTJ_03273	ACICU_00511	ACIAD0561	A1S_0502	ABAYE3263	ABZJ_00543	ABSDF3001
BJ-AB0715_00543	BJ-AB0868_00657	BJ-AB07104_00558	AB57_0605	ABK1_0544	ABBFA_003032	ABTW07_0542	ABTJ_03272	ACICU_00512	ACIAD0562	A1S_0503	ABAYE3262	ABZJ_00544	ABSDF3000
BJ-AB0715_00544	BJ-AB0868_00658	BJ-AB07104_00559	AB57_0606	ABK1_0545	ABBFA_003031	ABTW07_0543	ABTJ_03271	ACICU_00513	ACIAD0563	A1S_0504	ABAYE3261	ABZJ_00545	ABSDF2999
BJ-AB0715_00546	BJ-AB0868_00660	BJ-AB07104_00561	AB57_0608	ABK1_0547	ABBFA_003029	ABTW07_0545	ABTJ_03269	ACICU_00516	ACIAD0565	A1S_0506	ABAYE3259	ABZJ_00547	ABSDF2996
BJ-AB0715_00548	BJ-AB0868_00682	BJ-AB07104_00582	AB57_0610	ABK1_0571	ABBFA_003027	ABTW07_0566	ABTJ_03248	ACICU_00537	ACIAD3122	A1S_0528	ABAYE3257	ABZJ_00568	ABSDF2993
BJ-AB0715_00549	BJ-AB0868_00683	BJ-AB07104_00583	AB57_0611	ABK1_0572	ABBFA_003026	ABTW07_0567	ABTJ_03247	ACICU_00538	ACIAD3121	A1S_0529	ABAYE3256	ABZJ_00569	ABSDF2992
BJ-AB0715_00552	BJ-AB0868_00686	BJ-AB07104_00586	AB57_0614	ABK1_0575	ABBFA_003023	ABTW07_0570	ABTJ_03244	ACICU_00541	ACIAD3118	A1S_0532	ABAYE3252	ABZJ_00572	ABSDF2988
BJ-AB0715_00553	BJ-AB0868_00687	BJ-AB07104_00587	AB57_0615	ABK1_0576	ABBFA_003022	ABTW07_0571	ABTJ_03243	ACICU_00542	ACIAD3117	A1S_0533	ABAYE3251	ABZJ_00573	ABSDF2987
BJ-AB0715_00554	BJ-AB0868_00688	BJ-AB07104_00588	AB57_0616	ABK1_0577	ABBFA_003021	ABTW07_0572	ABTJ_03242	ACICU_00543	ACIAD3116	A1S_0534	ABAYE3250	ABZJ_00574	ABSDF2986
BJ-AB0715_00555	BJ-AB0868_00689	BJ-AB07104_00589	AB57_0617	ABK1_0578	ABBFA_003020	ABTW07_0573	ABTJ_03241	ACICU_00544	ACIAD3111	A1S_0535	ABAYE3249	ABZJ_00575	ABSDF2985
BJ-AB0715_00556	BJ-AB0868_00690	BJ-AB07104_00590	AB57_0618	ABK1_0579	ABBFA_003019	ABTW07_0574	ABTJ_03240	ACICU_00545	ACIAD3110	A1S_0536	ABAYE3248	ABZJ_00576	ABSDF2984
BJ-AB0715_00558	BJ-AB0868_00692	BJ-AB07104_00592	AB57_0620	ABK1_0581	ABBFA_003017	ABTW07_0576	ABTJ_03238	ACICU_00547	ACIAD3108	A1S_0539	ABAYE3246	ABZJ_00578	ABSDF2982
BJ-AB0715_00559	BJ-AB0868_00693	BJ-AB07104_00593	AB57_0621	ABK1_0582	ABBFA_003016	ABTW07_0577	ABTJ_03237	ACICU_00548	ACIAD3107	A1S_0540	ABAYE3245	ABZJ_00579	ABSDF2981
BJ-AB0715_00562	BJ-AB0868_00696	BJ-AB07104_00596	AB57_0624	ABK1_0585	ABBFA_003013	ABTW07_0580	ABTJ_03234	ACICU_00551	ACIAD3104	A1S_0543	ABAYE3240	ABZJ_00582	ABSDF2977
BJ-AB0715_00563	BJ-AB0868_00697	BJ-AB07104_00597	AB57_0625	ABK1_0586	ABBFA_003012	ABTW07_0581	ABTJ_03233	ACICU_00552	ACIAD3103	A1S_0544	ABAYE3239	ABZJ_00583	ABSDF2976
BJ-AB0715_00597	BJ-AB0868_00704	BJ-AB07104_00603	AB57_0631	ABK1_0593	ABBFA_003006	ABTW07_0587	ABTJ_03227	ACICU_00558	ACIAD3095	A1S_0554	ABAYE3232	ABZJ_00591	ABSDF2968
BJ-AB0715_00599	BJ-AB0868_00706	BJ-AB07104_00605	AB57_0634	ABK1_0595	ABBFA_003004	ABTW07_0589	ABTJ_03225	ACICU_00560	ACIAD3092	A1S_0556	ABAYE3230	ABZJ_00593	ABSDF2966
BJ-AB0715_00600	BJ-AB0868_00707	BJ-AB07104_00606	AB57_0635	ABK1_0596	ABBFA_003003	ABTW07_0590	ABTJ_03224	ACICU_00561	ACIAD3091	A1S_0557	ABAYE3229	ABZJ_00594	ABSDF2965
BJ-AB0715_00601	BJ-AB0868_00708	BJ-AB07104_00607	AB57_0636	ABK1_0597	ABBFA_003002	ABTW07_0591	ABTJ_03223	ACICU_00562	ACIAD3090	A1S_0558	ABAYE3228	ABZJ_00595	ABSDF2964
BJ-AB0715_00602	BJ-AB0868_00710	BJ-AB07104_00609	AB57_0637	ABK1_0599	ABBFA_003001	ABTW07_0593	ABTJ_03221	ACICU_00564	ACIAD3088	A1S_0559	ABAYE3227	ABZJ_00597	ABSDF2962
BJ-AB0715_00605	BJ-AB0868_00713	BJ-AB07104_00612	AB57_0640	ABK1_0602	ABBFA_002998	ABTW07_0595	ABTJ_03219	ACICU_00566	ACIAD3087	A1S_0561	ABAYE3224	ABZJ_00600	ABSDF2960
BJ-AB0715_00606	BJ-AB0868_00714	BJ-AB07104_00613	AB57_0641	ABK1_0603	ABBFA_002997	ABTW07_0596	ABTJ_03218	ACICU_00567	ACIAD3085	A1S_0562	ABAYE3223	ABZJ_00601	ABSDF2958
BJ-AB0715_00607	BJ-AB0868_00715	BJ-AB07104_00614	AB57_0667	ABK1_0604	ABBFA_002996	ABTW07_0597	ABTJ_03217	ACICU_00568	ACIAD3084	A1S_0563	ABAYE3196	ABZJ_00602	ABSDF2957
BJ-AB0715_00609	BJ-AB0868_00717	BJ-AB07104_00616	AB57_0669	ABK1_0606	ABBFA_002994	ABTW07_0599	ABTJ_03215	ACICU_00570	ACIAD3081	A1S_0565	ABAYE3194	ABZJ_00604	ABSDF2955
BJ-AB0715_00612	BJ-AB0868_00720	BJ-AB07104_00619	AB57_0672	ABK1_0609	ABBFA_002991	ABTW07_0602	ABTJ_03212	ACICU_00573	ACIAD3078	A1S_0568	ABAYE3191	ABZJ_00607	ABSDF2952
BJ-AB0715_00614	BJ-AB0868_00722	BJ-AB07104_00621	AB57_0674	ABK1_0611	ABBFA_002989	ABTW07_0604	ABTJ_03210	ACICU_00575	ACIAD3076	A1S_0570	ABAYE3189	ABZJ_00609	ABSDF2949
BJ-AB0715_00616	BJ-AB0868_00724	BJ-AB07104_00623	AB57_0676	ABK1_0613	ABBFA_002987	ABTW07_0606	ABTJ_03208	ACICU_00577	ACIAD3074	A1S_0572	ABAYE3187	ABZJ_00611	ABSDF2947
BJ-AB0715_00617	BJ-AB0868_00725	BJ-AB07104_00624	AB57_0677	ABK1_0614	ABBFA_002986	ABTW07_0607	ABTJ_03207	ACICU_00578	ACIAD3073	A1S_0573	ABAYE3186	ABZJ_00612	ABSDF2946
BJ-AB0715_00619	BJ-AB0868_00727	BJ-AB07104_00626	AB57_0680	ABK1_0616	ABBFA_002984	ABTW07_0609	ABTJ_03205	ACICU_00580	ACIAD3071	A1S_0575	ABAYE3184	ABZJ_00614	ABSDF2944
BJ-AB0715_00622	BJ-AB0868_00730	BJ-AB07104_00629	AB57_0683	ABK1_0619	ABBFA_002981	ABTW07_0612	ABTJ_03202	ACICU_00583	ACIAD3068	A1S_0579	ABAYE3181	ABZJ_00617	ABSDF2941
BJ-AB0715_00624	BJ-AB0868_00732	BJ-AB07104_00631	AB57_0685	ABK1_0621	ABBFA_002979	ABTW07_0614	ABTJ_03200	ACICU_00585	ACIAD3065	A1S_0581	ABAYE3179	ABZJ_00619	ABSDF2937
BJ-AB0715_00626	BJ-AB0868_00734	BJ-AB07104_00633	AB57_0687	ABK1_0623	ABBFA_002977	ABTW07_0616	ABTJ_03198	ACICU_00587	ACIAD3063	A1S_0583	ABAYE3177	ABZJ_00621	ABSDF2935
BJ-AB0715_00629	BJ-AB0868_00737	BJ-AB07104_00636	AB57_0690	ABK1_0626	ABBFA_002974	ABTW07_0619	ABTJ_03195	ACICU_00590	ACIAD3060	A1S_0587	ABAYE3174	ABZJ_00624	ABSDF2932
BJ-AB0715_00630	BJ-AB0868_00738	BJ-AB07104_00637	AB57_0691	ABK1_0627	ABBFA_002973	ABTW07_0620	ABTJ_03194	ACICU_00591	ACIAD3059	A1S_0588	ABAYE3173	ABZJ_00625	ABSDF2931
BJ-AB0715_00631	BJ-AB0868_00739	BJ-AB07104_00638	AB57_0692	ABK1_0628	ABBFA_002972	ABTW07_0621	ABTJ_03193	ACICU_00592	ACIAD3058	A1S_0589	ABAYE3172	ABZJ_00626	ABSDF2930
BJ-AB0715_00632	BJ-AB0868_00740	BJ-AB07104_00639	AB57_0693	ABK1_0629	ABBFA_002971	ABTW07_0622	ABTJ_03192	ACICU_00593	ACIAD3057	A1S_0590	ABAYE3171	ABZJ_00627	ABSDF2929
BJ-AB0715_00633	BJ-AB0868_00741	BJ-AB07104_00640	AB57_0694	ABK1_0630	ABBFA_002970	ABTW07_0623	ABTJ_03191	ACICU_00594	ACIAD3056	A1S_0591	ABAYE3170	ABZJ_00628	ABSDF2924
BJ-AB0715_00634	BJ-AB0868_00742	BJ-AB07104_00641	AB57_0695	ABK1_0631	ABBFA_002969	ABTW07_0624	ABTJ_03190	ACICU_00595	ACIAD3055	A1S_0592	ABAYE3169	ABZJ_00629	ABSDF2923
BJ-AB0715_00636	BJ-AB0868_00744	BJ-AB07104_00643	AB57_0697	ABK1_0633	ABBFA_002967	ABTW07_0626	ABTJ_03188	ACICU_00597	ACIAD3051	A1S_0594	ABAYE3167	ABZJ_00630	ABSDF2921
BJ-AB0715_00644	BJ-AB0868_00752	BJ-AB07104_00651	AB57_0704	ABK1_0641	ABBFA_002960	ABTW07_0634	ABTJ_03180	ACICU_00605	ACIAD3042	A1S_0601	ABAYE3160	ABZJ_00639	ABSDF2908
BJ-AB0715_00645	BJ-AB0868_00753	BJ-AB07104_00652	AB57_0705	ABK1_0642	ABBFA_002959	ABTW07_0635	ABTJ_03179	ACICU_00606	ACIAD3041	A1S_0602	ABAYE3159	ABZJ_00640	ABSDF2907
BJ-AB0715_00646	BJ-AB0868_00754	BJ-AB07104_00653	AB57_0706	ABK1_0643	ABBFA_002958	ABTW07_0636	ABTJ_03178	ACICU_00607	ACIAD3040	A1S_0603	ABAYE3158	ABZJ_00641	ABSDF2906
BJ-AB0715_00650	BJ-AB0868_00758	BJ-AB07104_00657	AB57_0709	ABK1_0646	ABBFA_002955	ABTW07_0639	ABTJ_03175	ACICU_00610	ACIAD3037	A1S_0606	ABAYE3155	ABZJ_00644	ABSDF2903
BJ-AB0715_00651	BJ-AB0868_00760	BJ-AB07104_00658	AB57_0710	ABK1_0647	ABBFA_002954	ABTW07_0640	ABTJ_03174	ACICU_00611	ACIAD3036	A1S_0607	ABAYE3154	ABZJ_00645	ABSDF2902
BJ-AB0715_00652	BJ-AB0868_00761	BJ-AB07104_00659	AB57_0711	ABK1_0648	ABBFA_002953	ABTW07_0641	ABTJ_03173	ACICU_00612	ACIAD3035	A1S_0608	ABAYE3153	ABZJ_00646	ABSDF2901
BJ-AB0715_00654	BJ-AB0868_00763	BJ-AB07104_00661	AB57_0713	ABK1_0650	ABBFA_002951	ABTW07_0643	ABTJ_03171	ACICU_00614	ACIAD3032	A1S_0610	ABAYE3151	ABZJ_00647	ABSDF2899
BJ-AB0715_00655	BJ-AB0868_00764	BJ-AB07104_00662	AB57_0714	ABK1_0651	ABBFA_002950	ABTW07_0644	ABTJ_03170	ACICU_00615	ACIAD3031	A1S_0611	ABAYE3150	ABZJ_00648	ABSDF2898
BJ-AB0715_00656	BJ-AB0868_00765	BJ-AB07104_00663	AB57_0715	ABK1_0652	ABBFA_002949	ABTW07_0645	ABTJ_03169	ACICU_00616	ACIAD3030	A1S_0612	ABAYE3149	ABZJ_00649	ABSDF2897
BJ-AB0715_00657	BJ-AB0868_00766	BJ-AB07104_00664	AB57_0717	ABK1_0653	ABBFA_002948	ABTW07_0646	ABTJ_03168	ACICU_00617	ACIAD3028	A1S_0613	ABAYE3148	ABZJ_00650	ABSDF2896
BJ-AB0715_00659	BJ-AB0868_00768	BJ-AB07104_00666	AB57_0718	ABK1_0655	ABBFA_002946	ABTW07_0648	ABTJ_03166	ACICU_00619	ACIAD3025	A1S_0615	ABAYE3146	ABZJ_00652	ABSDF2894
BJ-AB0715_00660	BJ-AB0868_00769	BJ-AB07104_00667	AB57_0719	ABK1_0656	ABBFA_002945	ABTW07_0649	ABTJ_03165	ACICU_00620	ACIAD3024	A1S_0616	ABAYE3145	ABZJ_00653	ABSDF2893
BJ-AB0715_00664	BJ-AB0868_00773	BJ-AB07104_00671	AB57_0724	ABK1_0660	ABBFA_002941	ABTW07_0653	ABTJ_03161	ACICU_00623	ACIAD3021	A1S_0619	ABAYE3141	ABZJ_00657	ABSDF2888
BJ-AB0715_00665	BJ-AB0868_00774	BJ-AB07104_00672	AB57_0725	ABK1_0661	ABBFA_002940	ABTW07_0654	ABTJ_03160	ACICU_00624	ACIAD3020	A1S_0620	ABAYE3140	ABZJ_00658	ABSDF2887
BJ-AB0715_00666	BJ-AB0868_00775	BJ-AB07104_00673	AB57_0726	ABK1_0662	ABBFA_002939	ABTW07_0655	ABTJ_03159	ACICU_00625	ACIAD3019	A1S_0621	ABAYE3139	ABZJ_00659	ABSDF2886
BJ-AB0715_00670	BJ-AB0868_00779	BJ-AB07104_00676	AB57_0729	ABK1_0664	ABBFA_002934	ABTW07_0658	ABTJ_03151	ACICU_00627	ACIAD0657	A1S_0682	ABAYE3136	ABZJ_00661	ABSDF2844
BJ-AB0715_00672	BJ-AB0868_00781	BJ-AB07104_00678	AB57_0731	ABK1_0666	ABBFA_002932	ABTW07_0660	ABTJ_03149	ACICU_00629	ACIAD0659	A1S_0684	ABAYE3134	ABZJ_00663	ABSDF2842
BJ-AB0715_00673	BJ-AB0868_00782	BJ-AB07104_00679	AB57_0732	ABK1_0667	ABBFA_002931	ABTW07_0661	ABTJ_03148	ACICU_00630	ACIAD0660	A1S_0685	ABAYE3133	ABZJ_00664	ABSDF2841
BJ-AB0715_00676	BJ-AB0868_00785	BJ-AB07104_00682	AB57_0737	ABK1_0670	ABBFA_002928	ABTW07_0664	ABTJ_03145	ACICU_00633	ACIAD0664	A1S_0688	ABAYE3130	ABZJ_00667	ABSDF2838
BJ-AB0715_00677	BJ-AB0868_00786	BJ-AB07104_00683	AB57_0738	ABK1_0671	ABBFA_002927	ABTW07_0665	ABTJ_03144	ACICU_00634	ACIAD0665	A1S_0689	ABAYE3129	ABZJ_00668	ABSDF2837
BJ-AB0715_00678	BJ-AB0868_00787	BJ-AB07104_00684	AB57_0739	ABK1_0672	ABBFA_002926	ABTW07_0666	ABTJ_03143	ACICU_00635	ACIAD0666	A1S_0690	ABAYE3128	ABZJ_00669	ABSDF2835
BJ-AB0715_00683	BJ-AB0868_00791	BJ-AB07104_00688	AB57_0742	ABK1_0675	ABBFA_002923	ABTW07_0670	ABTJ_03139	ACICU_00638	ACIAD0669	A1S_0693	ABAYE3125	ABZJ_00672	ABSDF2832
BJ-AB0715_00686	BJ-AB0868_00794	BJ-AB07104_00691	AB57_0745	ABK1_0678	ABBFA_002920	ABTW07_0673	ABTJ_03136	ACICU_00641	ACIAD0673	A1S_0696	ABAYE3122	ABZJ_00675	ABSDF2826
BJ-AB0715_00689	BJ-AB0868_00797	BJ-AB07104_00694	AB57_0748	ABK1_0681	ABBFA_002917	ABTW07_0676	ABTJ_03133	ACICU_00644	ACIAD0677	A1S_0699	ABAYE3119	ABZJ_00678	ABSDF2823
BJ-AB0715_00694	BJ-AB0868_00802	BJ-AB07104_00699	AB57_0753	ABK1_0686	ABBFA_002913	ABTW07_0681	ABTJ_03128	ACICU_00649	ACIAD0685	A1S_0705	ABAYE3114	ABZJ_00683	ABSDF2817
BJ-AB0715_00702	BJ-AB0868_00810	BJ-AB07104_00707	AB57_0761	ABK1_0694	ABBFA_002905	ABTW07_0689	ABTJ_03120	ACICU_00657	ACIAD0650	A1S_0712	ABAYE3105	ABZJ_00691	ABSDF2808
BJ-AB0715_00707	BJ-AB0868_00815	BJ-AB07104_00712	AB57_0766	ABK1_0699	ABBFA_002896	ABTW07_0694	ABTJ_03111	ACICU_00662	ACIAD1660	A1S_0721	ABAYE3097	ABZJ_00695	ABSDF2744
BJ-AB0715_00714	BJ-AB0868_00822	BJ-AB07104_00719	AB57_0773	ABK1_0706	ABBFA_002889	ABTW07_0701	ABTJ_03104	ACICU_00669	ACIAD1541	A1S_0728	ABAYE3089	ABZJ_00702	ABSDF2734
BJ-AB0715_00715	BJ-AB0868_00823	BJ-AB07104_00720	AB57_0774	ABK1_0707	ABBFA_002888	ABTW07_0702	ABTJ_03103	ACICU_00670	ACIAD1543	A1S_0729	ABAYE3088	ABZJ_00703	ABSDF2732
BJ-AB0715_00722	BJ-AB0868_00830	BJ-AB07104_00727	AB57_0781	ABK1_0714	ABBFA_002880	ABTW07_0709	ABTJ_03096	ACICU_00677	ACIAD3524	A1S_0736	ABAYE3080	ABZJ_00711	ABSDF2729
BJ-AB0715_00724	BJ-AB0868_00832	BJ-AB07104_00729	AB57_0783	ABK1_0716	ABBFA_002878	ABTW07_0711	ABTJ_03094	ACICU_00679	ACIAD3522	A1S_0738	ABAYE3078	ABZJ_00713	ABSDF2727
BJ-AB0715_00736	BJ-AB0868_00856	BJ-AB07104_00752	AB57_0792	ABK1_0741	ABBFA_002869	ABTW07_0734	ABTJ_03070	ACICU_00702	ACIAD0722	A1S_0746	ABAYE3067	ABZJ_00742	ABSDF2723
BJ-AB0715_00738	BJ-AB0868_00858	BJ-AB07104_00754	AB57_0794	ABK1_0743	ABBFA_002867	ABTW07_0735	ABTJ_03068	ACICU_00704	ACIAD0724	A1S_0747	ABAYE3065	ABZJ_00744	ABSDF2721
BJ-AB0715_00740	BJ-AB0868_00860	BJ-AB07104_00756	AB57_0797	ABK1_0745	ABBFA_002865	ABTW07_0737	ABTJ_03066	ACICU_00706	ACIAD0727	A1S_0749	ABAYE3063	ABZJ_00747	ABSDF2718
BJ-AB0715_00741	BJ-AB0868_00861	BJ-AB07104_00757	AB57_0798	ABK1_0746	ABBFA_002864	ABTW07_0738	ABTJ_03065	ACICU_00707	ACIAD0728	A1S_0750	ABAYE3062	ABZJ_00748	ABSDF2717
BJ-AB0715_00744	BJ-AB0868_00864	BJ-AB07104_00760	AB57_0801	ABK1_0749	ABBFA_002861	ABTW07_0741	ABTJ_03062	ACICU_00710	ACIAD0731	A1S_0753	ABAYE3059	ABZJ_00751	ABSDF2713
BJ-AB0715_00745	BJ-AB0868_00865	BJ-AB07104_00761	AB57_0802	ABK1_0750	ABBFA_002860	ABTW07_0742	ABTJ_03061	ACICU_00711	ACIAD0733	A1S_0754	ABAYE3058	ABZJ_00752	ABSDF2712
BJ-AB0715_00747	BJ-AB0868_00867	BJ-AB07104_00763	AB57_0804	ABK1_0752	ABBFA_002858	ABTW07_0744	ABTJ_03059	ACICU_00713	ACIAD0735	A1S_0756	ABAYE3056	ABZJ_00754	ABSDF2710
BJ-AB0715_00748	BJ-AB0868_00868	BJ-AB07104_00764	AB57_0805	ABK1_0753	ABBFA_002857	ABTW07_0745	ABTJ_03058	ACICU_00714	ACIAD0736	A1S_0757	ABAYE3055	ABZJ_00755	ABSDF2709
BJ-AB0715_00749	BJ-AB0868_00869	BJ-AB07104_00765	AB57_0806	ABK1_0754	ABBFA_002856	ABTW07_0746	ABTJ_03057	ACICU_00715	ACIAD0737	A1S_0758	ABAYE3054	ABZJ_00756	ABSDF2708
BJ-AB0715_00750	BJ-AB0868_00870	BJ-AB07104_00766	AB57_0807	ABK1_0755	ABBFA_002855	ABTW07_0747	ABTJ_03056	ACICU_00716	ACIAD0738	A1S_0759	ABAYE3053	ABZJ_00757	ABSDF2707
BJ-AB0715_00753	BJ-AB0868_00873	BJ-AB07104_00769	AB57_0810	ABK1_0758	ABBFA_002852	ABTW07_0750	ABTJ_03053	ACICU_00719	ACIAD0741	A1S_0762	ABAYE3050	ABZJ_00760	ABSDF2704
BJ-AB0715_00754	BJ-AB0868_00874	BJ-AB07104_00770	AB57_0811	ABK1_0759	ABBFA_002851	ABTW07_0751	ABTJ_03052	ACICU_00720	ACIAD0742	A1S_0763	ABAYE3049	ABZJ_00761	ABSDF2703
BJ-AB0715_00755	BJ-AB0868_00875	BJ-AB07104_00771	AB57_0812	ABK1_0760	ABBFA_002850	ABTW07_0752	ABTJ_03051	ACICU_00721	ACIAD0743	A1S_0764	ABAYE3048	ABZJ_00762	ABSDF2702
BJ-AB0715_00756	BJ-AB0868_00876	BJ-AB07104_00772	AB57_0813	ABK1_0761	ABBFA_002849	ABTW07_0753	ABTJ_03050	ACICU_00722	ACIAD0744	A1S_0765	ABAYE3047	ABZJ_00764	ABSDF2701
BJ-AB0715_00757	BJ-AB0868_00877	BJ-AB07104_00773	AB57_0814	ABK1_0762	ABBFA_002848	ABTW07_0754	ABTJ_03049	ACICU_00723	ACIAD1044	A1S_0766	ABAYE3046	ABZJ_00765	ABSDF2700
BJ-AB0715_00758	BJ-AB0868_00878	BJ-AB07104_00774	AB57_0816	ABK1_0763	ABBFA_002846	ABTW07_0755	ABTJ_03048	ACICU_00724	ACIAD0746	A1S_0768	ABAYE3044	ABZJ_00766	ABSDF2699
BJ-AB0715_00759	BJ-AB0868_00879	BJ-AB07104_00775	AB57_0817	ABK1_0764	ABBFA_002845	ABTW07_0756	ABTJ_03047	ACICU_00725	ACIAD0747	A1S_0769	ABAYE3043	ABZJ_00767	ABSDF2698
BJ-AB0715_00760	BJ-AB0868_00880	BJ-AB07104_00776	AB57_0818	ABK1_0765	ABBFA_002844	ABTW07_0757	ABTJ_03046	ACICU_00726	ACIAD0748	A1S_0770	ABAYE3042	ABZJ_00768	ABSDF2697
BJ-AB0715_00762	BJ-AB0868_00882	BJ-AB07104_00778	AB57_0820	ABK1_0767	ABBFA_002842	ABTW07_0759	ABTJ_03044	ACICU_00728	ACIAD0750	A1S_0771	ABAYE3040	ABZJ_00770	ABSDF2695
BJ-AB0715_00764	BJ-AB0868_00884	BJ-AB07104_00780	AB57_0822	ABK1_0769	ABBFA_002840	ABTW07_0761	ABTJ_03042	ACICU_00730	ACIAD0752	A1S_0772	ABAYE3038	ABZJ_00772	ABSDF2693
BJ-AB0715_00766	BJ-AB0868_00886	BJ-AB07104_00782	AB57_0824	ABK1_0771	ABBFA_002838	ABTW07_0763	ABTJ_03040	ACICU_00732	ACIAD0755	A1S_0774	ABAYE3036	ABZJ_00774	ABSDF2691
BJ-AB0715_00767	BJ-AB0868_00887	BJ-AB07104_00783	AB57_0825	ABK1_0772	ABBFA_002837	ABTW07_0764	ABTJ_03039	ACICU_00733	ACIAD0756	A1S_0775	ABAYE3035	ABZJ_00775	ABSDF2690
BJ-AB0715_00769	BJ-AB0868_00889	BJ-AB07104_00785	AB57_0827	ABK1_0774	ABBFA_002835	ABTW07_0766	ABTJ_03037	ACICU_00735	ACIAD0759	A1S_0777	ABAYE3033	ABZJ_00777	ABSDF2688
BJ-AB0715_00771	BJ-AB0868_00891	BJ-AB07104_00787	AB57_0829	ABK1_0776	ABBFA_002833	ABTW07_0768	ABTJ_03035	ACICU_00737	ACIAD0768	A1S_0778	ABAYE3031	ABZJ_00779	ABSDF2686
BJ-AB0715_00773	BJ-AB0868_00893	BJ-AB07104_00789	AB57_0831	ABK1_0778	ABBFA_002831	ABTW07_0770	ABTJ_03033	ACICU_00739	ACIAD0772	A1S_0780	ABAYE3029	ABZJ_00781	ABSDF2684
BJ-AB0715_00777	BJ-AB0868_00897	BJ-AB07104_00793	AB57_0835	ABK1_0782	ABBFA_002827	ABTW07_0774	ABTJ_03029	ACICU_00743	ACIAD0776	A1S_0784	ABAYE3025	ABZJ_00785	ABSDF2679
BJ-AB0715_00787	BJ-AB0868_00907	BJ-AB07104_00803	AB57_0846	ABK1_0792	ABBFA_002817	ABTW07_0784	ABTJ_03018	ACICU_00753	ACIAD0841	A1S_0794	ABAYE3015	ABZJ_00795	ABSDF2664
BJ-AB0715_00790	BJ-AB0868_00911	BJ-AB07104_00806	AB57_0849	ABK1_0795	ABBFA_002814	ABTW07_0787	ABTJ_03015	ACICU_00756	ACIAD0846	A1S_0797	ABAYE3012	ABZJ_00798	ABSDF2661
BJ-AB0715_00791	BJ-AB0868_00912	BJ-AB07104_00807	AB57_0850	ABK1_0796	ABBFA_002813	ABTW07_0788	ABTJ_03014	ACICU_00757	ACIAD0847	A1S_0798	ABAYE3011	ABZJ_00799	ABSDF2660
BJ-AB0715_00792	BJ-AB0868_00913	BJ-AB07104_00808	AB57_0851	ABK1_0797	ABBFA_002812	ABTW07_0789	ABTJ_03013	ACICU_00758	ACIAD0848	A1S_0799	ABAYE3010	ABZJ_00800	ABSDF2659
BJ-AB0715_00793	BJ-AB0868_00914	BJ-AB07104_00809	AB57_0852	ABK1_0798	ABBFA_002811	ABTW07_0790	ABTJ_03012	ACICU_00759	ACIAD0852	A1S_0800	ABAYE3009	ABZJ_00801	ABSDF2658
BJ-AB0715_00798	BJ-AB0868_00919	BJ-AB07104_00814	AB57_0857	ABK1_0803	ABBFA_002805	ABTW07_0795	ABTJ_03007	ACICU_00764	ACIAD0856	A1S_0806	ABAYE3004	ABZJ_00806	ABSDF2653
BJ-AB0715_00800	BJ-AB0868_00921	BJ-AB07104_00816	AB57_0860	ABK1_0805	ABBFA_002803	ABTW07_0797	ABTJ_03005	ACICU_00766	ACIAD0858	A1S_0808	ABAYE3002	ABZJ_00808	ABSDF2651
BJ-AB0715_00802	BJ-AB0868_00923	BJ-AB07104_00818	AB57_0862	ABK1_0807	ABBFA_002802	ABTW07_0799	ABTJ_03003	ACICU_00768	ACIAD0861	A1S_0810	ABAYE3000	ABZJ_00810	ABSDF2649
BJ-AB0715_00803	BJ-AB0868_00924	BJ-AB07104_00819	AB57_0863	ABK1_0808	ABBFA_002801	ABTW07_0800	ABTJ_03002	ACICU_00769	ACIAD0862	A1S_0811	ABAYE2999	ABZJ_00811	ABSDF2648
BJ-AB0715_00808	BJ-AB0868_00929	BJ-AB07104_00824	AB57_0869	ABK1_0813	ABBFA_002796	ABTW07_0805	ABTJ_02997	ACICU_00774	ACIAD0869	A1S_0816	ABAYE2994	ABZJ_00816	ABSDF2642
BJ-AB0715_00809	BJ-AB0868_00930	BJ-AB07104_00825	AB57_0870	ABK1_0814	ABBFA_002795	ABTW07_0806	ABTJ_02996	ACICU_00775	ACIAD0870	A1S_0817	ABAYE2993	ABZJ_00817	ABSDF2641
BJ-AB0715_00814	BJ-AB0868_00935	BJ-AB07104_00830	AB57_0875	ABK1_0819	ABBFA_002790	ABTW07_0811	ABTJ_02991	ACICU_00780	ACIAD0876	A1S_0822	ABAYE2988	ABZJ_00822	ABSDF2636
BJ-AB0715_00815	BJ-AB0868_00936	BJ-AB07104_00831	AB57_0876	ABK1_0820	ABBFA_002789	ABTW07_0812	ABTJ_02990	ACICU_00781	ACIAD2913	A1S_0823	ABAYE2987	ABZJ_00823	ABSDF2635
BJ-AB0715_00820	BJ-AB0868_00941	BJ-AB07104_00836	AB57_0881	ABK1_0825	ABBFA_002784	ABTW07_0817	ABTJ_02984	ACICU_00786	ACIAD2908	A1S_0828	ABAYE2982	ABZJ_00828	ABSDF2628
BJ-AB0715_00821	BJ-AB0868_00942	BJ-AB07104_00837	AB57_0882	ABK1_0826	ABBFA_002783	ABTW07_0818	ABTJ_02983	ACICU_00787	ACIAD2907	A1S_0829	ABAYE2981	ABZJ_00829	ABSDF2627
BJ-AB0715_00824	BJ-AB0868_00944	BJ-AB07104_00840	AB57_0884	ABK1_0827	ABBFA_002777	ABTW07_0820	ABTJ_02977	ACICU_00789	ACIAD2902	A1S_0835	ABAYE2978	ABZJ_00830	ABSDF2625
BJ-AB0715_00825	BJ-AB0868_00945	BJ-AB07104_00841	AB57_0885	ABK1_0828	ABBFA_002776	ABTW07_0821	ABTJ_02976	ACICU_00790	ACIAD2901	A1S_0836	ABAYE2977	ABZJ_00831	ABSDF2624
BJ-AB0715_00826	BJ-AB0868_00946	BJ-AB07104_00842	AB57_0887	ABK1_0829	ABBFA_002775	ABTW07_0822	ABTJ_02975	ACICU_00791	ACIAD2900	A1S_0837	ABAYE2976	ABZJ_00832	ABSDF2623
BJ-AB0715_00828	BJ-AB0868_00948	BJ-AB07104_00844	AB57_0888	ABK1_0831	ABBFA_002773	ABTW07_0824	ABTJ_02973	ACICU_00793	ACIAD2898	A1S_0840	ABAYE2974	ABZJ_00834	ABSDF2621
BJ-AB0715_00829	BJ-AB0868_00949	BJ-AB07104_00845	AB57_0889	ABK1_0832	ABBFA_002772	ABTW07_0825	ABTJ_02972	ACICU_00794	ACIAD2897	A1S_0841	ABAYE2973	ABZJ_00835	ABSDF2620
BJ-AB0715_00831	BJ-AB0868_00951	BJ-AB07104_00847	AB57_0891	ABK1_0834	ABBFA_002770	ABTW07_0827	ABTJ_02970	ACICU_00796	ACIAD2895	A1S_0843	ABAYE2971	ABZJ_00837	ABSDF2618
BJ-AB0715_00833	BJ-AB0868_00953	BJ-AB07104_00849	AB57_0893	ABK1_0836	ABBFA_002768	ABTW07_0829	ABTJ_02968	ACICU_00798	ACIAD2893	A1S_0845	ABAYE2969	ABZJ_00839	ABSDF2584
BJ-AB0715_00852	BJ-AB0868_00971	BJ-AB07104_00866	AB57_0911	ABK1_0853	ABBFA_002749	ABTW07_0846	ABTJ_02948	ACICU_00815	ACIAD0881	A1S_0866	ABAYE2949	ABZJ_00856	ABSDF2570
BJ-AB0715_00853	BJ-AB0868_00972	BJ-AB07104_00867	AB57_0912	ABK1_0854	ABBFA_002748	ABTW07_0847	ABTJ_02947	ACICU_00816	ACIAD0883	A1S_0867	ABAYE2948	ABZJ_00857	ABSDF2569
BJ-AB0715_00854	BJ-AB0868_00973	BJ-AB07104_00868	AB57_0913	ABK1_0855	ABBFA_002747	ABTW07_0848	ABTJ_02946	ACICU_00817	ACIAD0884	A1S_0868	ABAYE2947	ABZJ_00858	ABSDF2568
BJ-AB0715_00856	BJ-AB0868_00975	BJ-AB07104_00870	AB57_0915	ABK1_0857	ABBFA_002744	ABTW07_0849	ABTJ_02944	ACICU_00819	ACIAD0886	A1S_0870	ABAYE2945	ABZJ_00860	ABSDF2566
BJ-AB0715_00858	BJ-AB0868_00977	BJ-AB07104_00872	AB57_0919	ABK1_0859	ABBFA_002742	ABTW07_0851	ABTJ_02942	ACICU_00821	ACIAD0887	A1S_0872	ABAYE2943	ABZJ_00862	ABSDF2564
BJ-AB0715_00864	BJ-AB0868_00984	BJ-AB07104_00880	AB57_0926	ABK1_0866	ABBFA_002736	ABTW07_0858	ABTJ_02935	ACICU_00829	ACIAD0892	A1S_0878	ABAYE2937	ABZJ_00869	ABSDF2558
BJ-AB0715_00865	BJ-AB0868_00985	BJ-AB07104_00881	AB57_0927	ABK1_0867	ABBFA_002735	ABTW07_0859	ABTJ_02934	ACICU_00830	ACIAD0893	A1S_0879	ABAYE2936	ABZJ_00870	ABSDF2557
BJ-AB0715_00868	BJ-AB0868_00988	BJ-AB07104_00884	AB57_0930	ABK1_0870	ABBFA_002732	ABTW07_0862	ABTJ_02931	ACICU_00833	ACIAD0896	A1S_0882	ABAYE2933	ABZJ_00873	ABSDF2554
BJ-AB0715_00869	BJ-AB0868_00989	BJ-AB07104_00885	AB57_0931	ABK1_0871	ABBFA_002731	ABTW07_0863	ABTJ_02930	ACICU_00834	ACIAD0897	A1S_0883	ABAYE2932	ABZJ_00874	ABSDF2553
BJ-AB0715_00870	BJ-AB0868_00990	BJ-AB07104_00886	AB57_0932	ABK1_0872	ABBFA_002730	ABTW07_0864	ABTJ_02929	ACICU_00835	ACIAD0898	A1S_0884	ABAYE2931	ABZJ_00875	ABSDF2552
BJ-AB0715_00871	BJ-AB0868_00991	BJ-AB07104_00887	AB57_0933	ABK1_0873	ABBFA_002729	ABTW07_0865	ABTJ_02927	ACICU_00836	ACIAD0900	A1S_0885	ABAYE2930	ABZJ_00876	ABSDF2551
BJ-AB0715_00873	BJ-AB0868_00993	BJ-AB07104_00889	AB57_0935	ABK1_0875	ABBFA_002727	ABTW07_0867	ABTJ_02925	ACICU_00838	ACIAD0902	A1S_0887	ABAYE2928	ABZJ_00878	ABSDF2549
BJ-AB0715_00874	BJ-AB0868_00994	BJ-AB07104_00890	AB57_0936	ABK1_0876	ABBFA_002726	ABTW07_0868	ABTJ_02924	ACICU_00839	ACIAD0903	A1S_0888	ABAYE2927	ABZJ_00879	ABSDF2548
BJ-AB0715_00875	BJ-AB0868_00995	BJ-AB07104_00891	AB57_0937	ABK1_0877	ABBFA_002725	ABTW07_0869	ABTJ_02923	ACICU_00840	ACIAD0904	A1S_0889	ABAYE2926	ABZJ_00880	ABSDF2547
BJ-AB0715_00876	BJ-AB0868_00996	BJ-AB07104_00892	AB57_0938	ABK1_0878	ABBFA_002724	ABTW07_0870	ABTJ_02922	ACICU_00841	ACIAD0905	A1S_0890	ABAYE2925	ABZJ_00881	ABSDF2546
BJ-AB0715_00881	BJ-AB0868_01001	BJ-AB07104_00897	AB57_0943	ABK1_0883	ABBFA_002719	ABTW07_0875	ABTJ_02917	ACICU_00846	ACIAD0910	A1S_0895	ABAYE2920	ABZJ_00886	ABSDF2538
BJ-AB0715_00885	BJ-AB0868_01005	BJ-AB07104_00901	AB57_0947	ABK1_0887	ABBFA_002715	ABTW07_0879	ABTJ_02913	ACICU_00850	ACIAD0916	A1S_0899	ABAYE2916	ABZJ_00891	ABSDF2532
BJ-AB0715_00886	BJ-AB0868_01006	BJ-AB07104_00902	AB57_0948	ABK1_0888	ABBFA_002714	ABTW07_0880	ABTJ_02912	ACICU_00851	ACIAD0917	A1S_0900	ABAYE2915	ABZJ_00892	ABSDF2531
BJ-AB0715_00887	BJ-AB0868_01007	BJ-AB07104_00903	AB57_0949	ABK1_0889	ABBFA_002713	ABTW07_0881	ABTJ_02911	ACICU_00852	ACIAD0918	A1S_0901	ABAYE2914	ABZJ_00893	ABSDF2530
BJ-AB0715_00891	BJ-AB0868_01011	BJ-AB07104_00907	AB57_0952	ABK1_0893	ABBFA_002710	ABTW07_0885	ABTJ_02907	ACICU_00856	ACIAD0922	A1S_0905	ABAYE2910	ABZJ_00897	ABSDF2526
BJ-AB0715_00892	BJ-AB0868_01012	BJ-AB07104_00908	AB57_0954	ABK1_0894	ABBFA_002709	ABTW07_0886	ABTJ_02906	ACICU_00857	ACIAD0923	A1S_0906	ABAYE2909	ABZJ_00898	ABSDF2525
BJ-AB0715_00896	BJ-AB0868_01016	BJ-AB07104_00912	AB57_0958	ABK1_0898	ABBFA_002705	ABTW07_0890	ABTJ_02902	ACICU_00861	ACIAD0929	A1S_0910	ABAYE2905	ABZJ_00902	ABSDF2518
BJ-AB0715_01031	BJ-AB0868_01133	BJ-AB07104_01023	AB57_1003	ABK1_0914	ABBFA_002683	ABTW07_1018	ABTJ_02883	ACICU_00889	ACIAD1009	A1S_0927	ABAYE2867	ABZJ_01029	ABSDF2439
BJ-AB0715_01032	BJ-AB0868_01134	BJ-AB07104_01024	AB57_1004	ABK1_0915	ABBFA_002682	ABTW07_1019	ABTJ_02882	ACICU_00890	ACIAD1010	A1S_0928	ABAYE2866	ABZJ_01030	ABSDF2438
BJ-AB0715_01033	BJ-AB0868_01135	BJ-AB07104_01025	AB57_1005	ABK1_0916	ABBFA_002681	ABTW07_1020	ABTJ_02881	ACICU_00891	ACIAD1011	A1S_0929	ABAYE2865	ABZJ_01031	ABSDF2437
BJ-AB0715_01035	BJ-AB0868_01137	BJ-AB07104_01027	AB57_1007	ABK1_0918	ABBFA_002679	ABTW07_1022	ABTJ_02879	ACICU_00893	ACIAD1013	A1S_0932	ABAYE2863	ABZJ_01033	ABSDF2435
BJ-AB0715_01036	BJ-AB0868_01138	BJ-AB07104_01028	AB57_1008	ABK1_0919	ABBFA_002678	ABTW07_1023	ABTJ_02878	ACICU_00894	ACIAD1023	A1S_0933	ABAYE2862	ABZJ_01034	ABSDF2434
BJ-AB0715_01038	BJ-AB0868_01140	BJ-AB07104_01030	AB57_1010	ABK1_0921	ABBFA_002676	ABTW07_1025	ABTJ_02876	ACICU_00896	ACIAD1025	A1S_0934	ABAYE2859	ABZJ_01036	ABSDF2432
BJ-AB0715_01074	BJ-AB0868_01180	BJ-AB07104_01070	AB57_1050	ABK1_0959	ABBFA_002637	ABTW07_1063	ABTJ_02838	ACICU_00934	ACIAD1047	A1S_0972	ABAYE2820	ABZJ_01076	ABSDF2427
BJ-AB0715_01081	BJ-AB0868_01187	BJ-AB07104_01077	AB57_1057	ABK1_0965	ABBFA_002631	ABTW07_1069	ABTJ_02832	ACICU_00940	ACIAD1051	A1S_0978	ABAYE2814	ABZJ_01083	ABSDF2423
BJ-AB0715_01087	BJ-AB0868_01193	BJ-AB07104_01083	AB57_1064	ABK1_0971	ABBFA_002625	ABTW07_1075	ABTJ_02826	ACICU_00946	ACIAD1057	A1S_0985	ABAYE2808	ABZJ_01089	ABSDF2417
BJ-AB0715_01091	BJ-AB0868_01197	BJ-AB07104_01087	AB57_1068	ABK1_0975	ABBFA_002621	ABTW07_1079	ABTJ_02822	ACICU_00950	ACIAD1061	A1S_0989	ABAYE2804	ABZJ_01093	ABSDF2409
BJ-AB0715_01092	BJ-AB0868_01198	BJ-AB07104_01088	AB57_1069	ABK1_0976	ABBFA_002620	ABTW07_1080	ABTJ_02821	ACICU_00951	ACIAD1062	A1S_0990	ABAYE2803	ABZJ_01094	ABSDF2408
BJ-AB0715_01094	BJ-AB0868_01200	BJ-AB07104_01090	AB57_1071	ABK1_0978	ABBFA_002618	ABTW07_1082	ABTJ_02819	ACICU_00953	ACIAD1063	A1S_0992	ABAYE2801	ABZJ_01096	ABSDF2402
BJ-AB0715_01095	BJ-AB0868_01201	BJ-AB07104_01091	AB57_1072	ABK1_0979	ABBFA_002617	ABTW07_1083	ABTJ_02818	ACICU_00954	ACIAD1064	A1S_0993	ABAYE2800	ABZJ_01097	ABSDF2403
BJ-AB0715_01096	BJ-AB0868_01202	BJ-AB07104_01092	AB57_1073	ABK1_0980	ABBFA_002616	ABTW07_1084	ABTJ_02817	ACICU_00955	ACIAD1065	A1S_0994	ABAYE2799	ABZJ_01098	ABSDF2404
BJ-AB0715_01097	BJ-AB0868_01203	BJ-AB07104_01093	AB57_1074	ABK1_0981	ABBFA_002615	ABTW07_1085	ABTJ_02816	ACICU_00956	ACIAD1066	A1S_0995	ABAYE2798	ABZJ_01099	ABSDF2405
BJ-AB0715_01101	BJ-AB0868_01206	BJ-AB07104_01096	AB57_1077	ABK1_0984	ABBFA_002612	ABTW07_1088	ABTJ_02813	ACICU_00959	ACIAD1069	A1S_0998	ABAYE2794	ABZJ_01102	ABSDF2397
BJ-AB0715_01102	BJ-AB0868_01207	BJ-AB07104_01097	AB57_1078	ABK1_0985	ABBFA_002611	ABTW07_1089	ABTJ_02812	ACICU_00960	ACIAD0110	A1S_0999	ABAYE2793	ABZJ_01103	ABSDF2396
BJ-AB0715_01104	BJ-AB0868_01209	BJ-AB07104_01099	AB57_1080	ABK1_0986	ABBFA_002609	ABTW07_1090	ABTJ_02810	ACICU_00961	ACIAD1072	A1S_1000	ABAYE2791	ABZJ_01105	ABSDF2394
BJ-AB0715_01105	BJ-AB0868_01210	BJ-AB07104_01100	AB57_1081	ABK1_0987	ABBFA_002608	ABTW07_1091	ABTJ_02809	ACICU_00962	ACIAD1073	A1S_1001	ABAYE2790	ABZJ_01106	ABSDF2393
BJ-AB0715_01109	BJ-AB0868_01215	BJ-AB07104_01105	AB57_1085	ABK1_0992	ABBFA_002604	ABTW07_1096	ABTJ_02805	ACICU_00966	ACIAD1081	A1S_1005	ABAYE2786	ABZJ_01110	ABSDF2385
BJ-AB0715_01111	BJ-AB0868_01218	BJ-AB07104_01107	AB57_1087	ABK1_0994	ABBFA_002602	ABTW07_1098	ABTJ_02803	ACICU_00968	ACIAD1084	A1S_1008	ABAYE2783	ABZJ_01112	ABSDF2383
BJ-AB0715_01115	BJ-AB0868_01222	BJ-AB07104_01111	AB57_1091	ABK1_0998	ABBFA_002598	ABTW07_1101	ABTJ_02800	ACICU_00971	ACIAD1088	A1S_1011	ABAYE2779	ABZJ_01115	ABSDF2378
BJ-AB0715_01116	BJ-AB0868_01223	BJ-AB07104_01112	AB57_1092	ABK1_0999	ABBFA_002597	ABTW07_1102	ABTJ_02799	ACICU_00972	ACIAD1089	A1S_1012	ABAYE2778	ABZJ_01117	ABSDF2377
BJ-AB0715_01119	BJ-AB0868_01226	BJ-AB07104_01116	AB57_1095	ABK1_1002	ABBFA_002594	ABTW07_1105	ABTJ_02796	ACICU_00976	ACIAD1093	A1S_1015	ABAYE2775	ABZJ_01120	ABSDF2372
BJ-AB0715_01122	BJ-AB0868_01229	BJ-AB07104_01119	AB57_1098	ABK1_1005	ABBFA_002591	ABTW07_1108	ABTJ_02793	ACICU_00979	ACIAD1096	A1S_1018	ABAYE2772	ABZJ_01123	ABSDF2369
BJ-AB0715_01124	BJ-AB0868_01231	BJ-AB07104_01121	AB57_1100	ABK1_1007	ABBFA_002589	ABTW07_1110	ABTJ_02791	ACICU_00981	ACIAD1101	A1S_1020	ABAYE2770	ABZJ_01125	ABSDF2367
BJ-AB0715_01125	BJ-AB0868_01232	BJ-AB07104_01122	AB57_1101	ABK1_1008	ABBFA_002588	ABTW07_1111	ABTJ_02790	ACICU_00982	ACIAD1102	A1S_1021	ABAYE2769	ABZJ_01126	ABSDF2366
BJ-AB0715_01126	BJ-AB0868_01233	BJ-AB07104_01123	AB57_1102	ABK1_1009	ABBFA_002587	ABTW07_1112	ABTJ_02789	ACICU_00983	ACIAD1103	A1S_1022	ABAYE2768	ABZJ_01127	ABSDF2365
BJ-AB0715_01127	BJ-AB0868_01234	BJ-AB07104_01124	AB57_1103	ABK1_1010	ABBFA_002586	ABTW07_1113	ABTJ_02788	ACICU_00984	ACIAD1105	A1S_1023	ABAYE2767	ABZJ_01128	ABSDF2364
BJ-AB0715_01130	BJ-AB0868_01238	BJ-AB07104_01128	AB57_1107	ABK1_1013	ABBFA_002583	ABTW07_1116	ABTJ_02785	ACICU_00988	ACIAD1110	A1S_1026	ABAYE2764	ABZJ_01132	ABSDF2361
BJ-AB0715_01132	BJ-AB0868_01240	BJ-AB07104_01130	AB57_1109	ABK1_1015	ABBFA_002581	ABTW07_1118	ABTJ_02783	ACICU_00990	ACIAD1112	A1S_1028	ABAYE2762	ABZJ_01134	ABSDF2359
BJ-AB0715_01137	BJ-AB0868_01245	BJ-AB07104_01135	AB57_1112	ABK1_1020	ABBFA_002578	ABTW07_1126	ABTJ_02778	ACICU_00995	ACIAD1116	A1S_1034	ABAYE2759	ABZJ_01139	ABSDF2353
BJ-AB0715_01210	BJ-AB0868_01299	BJ-AB07104_01262	AB57_1116	ABK1_1095	ABBFA_002514	ABTW07_1247	ABTJ_02645	ACICU_01076	ACIAD1123	A1S_1036	ABAYE2682	ABZJ_01223	ABSDF1341
BJ-AB0715_01212	BJ-AB0868_01301	BJ-AB07104_01264	AB57_1118	ABK1_1097	ABBFA_002512	ABTW07_1249	ABTJ_02643	ACICU_01078	ACIAD1125	A1S_1038	ABAYE2680	ABZJ_01225	ABSDF1343
BJ-AB0715_01214	BJ-AB0868_01303	BJ-AB07104_01266	AB57_1120	ABK1_1099	ABBFA_002509	ABTW07_1251	ABTJ_02641	ACICU_01080	ACIAD1127	A1S_1040	ABAYE2678	ABZJ_01227	ABSDF1345
BJ-AB0715_01215	BJ-AB0868_01304	BJ-AB07104_01267	AB57_1121	ABK1_1100	ABBFA_002508	ABTW07_1252	ABTJ_02640	ACICU_01081	ACIAD1128	A1S_1041	ABAYE2677	ABZJ_01228	ABSDF1346
BJ-AB0715_01217	BJ-AB0868_01306	BJ-AB07104_01268	AB57_1123	ABK1_1101	ABBFA_002506	ABTW07_1253	ABTJ_02639	ACICU_01082	ACIAD1129	A1S_1042	ABAYE2676	ABZJ_01230	ABSDF1347
BJ-AB0715_01221	BJ-AB0868_01310	BJ-AB07104_01272	AB57_1127	ABK1_1106	ABBFA_002502	ABTW07_1257	ABTJ_02635	ACICU_01086	ACIAD0967	A1S_1047	ABAYE2672	ABZJ_01235	ABSDF1351
BJ-AB0715_01225	BJ-AB0868_01313	BJ-AB07104_01275	AB57_1130	ABK1_1109	ABBFA_002499	ABTW07_1260	ABTJ_02632	ACICU_01089	ACIAD1132	A1S_1049	ABAYE2669	ABZJ_01238	ABSDF1354
BJ-AB0715_01227	BJ-AB0868_01315	BJ-AB07104_01277	AB57_1132	ABK1_1111	ABBFA_002497	ABTW07_1262	ABTJ_02630	ACICU_01091	ACIAD1134	A1S_1051	ABAYE2667	ABZJ_01240	ABSDF1356
BJ-AB0715_01228	BJ-AB0868_01316	BJ-AB07104_01278	AB57_1133	ABK1_1112	ABBFA_002496	ABTW07_1263	ABTJ_02629	ACICU_01092	ACIAD1135	A1S_1052	ABAYE2666	ABZJ_01241	ABSDF1357
BJ-AB0715_01230	BJ-AB0868_01318	BJ-AB07104_01280	AB57_1135	ABK1_1114	ABBFA_002494	ABTW07_1265	ABTJ_02627	ACICU_01094	ACIAD1137	A1S_1054	ABAYE2664	ABZJ_01243	ABSDF1361
BJ-AB0715_01231	BJ-AB0868_01319	BJ-AB07104_01281	AB57_1136	ABK1_1115	ABBFA_002493	ABTW07_1266	ABTJ_02626	ACICU_01095	ACIAD1138	A1S_1055	ABAYE2663	ABZJ_01244	ABSDF1362
BJ-AB0715_01236	BJ-AB0868_01324	BJ-AB07104_01286	AB57_1141	ABK1_1120	ABBFA_002488	ABTW07_1271	ABTJ_02621	ACICU_01100	ACIAD1143	A1S_1062	ABAYE2658	ABZJ_01249	ABSDF1367
BJ-AB0715_01239	BJ-AB0868_01327	BJ-AB07104_01289	AB57_1150	ABK1_1123	ABBFA_002478	ABTW07_1274	ABTJ_02617	ACICU_01103	ACIAD1150	A1S_1066	ABAYE2646	ABZJ_01252	ABSDF1373
BJ-AB0715_01242	BJ-AB0868_01330	BJ-AB07104_01292	AB57_1153	ABK1_1126	ABBFA_002475	ABTW07_1277	ABTJ_02614	ACICU_01106	ACIAD1155	A1S_1070	ABAYE2640	ABZJ_01256	ABSDF1380
BJ-AB0715_01324	BJ-AB0868_01385	BJ-AB07104_01323	AB57_1224	ABK1_1608	ABBFA_002404	ABTW07_1340	ABTJ_02555	ACICU_01153	ACIAD1252	A1S_1142	ABAYE2596	ABZJ_01311	ABSDF1432
BJ-AB0715_01325	BJ-AB0868_01386	BJ-AB07104_01324	AB57_1311	ABK1_1609	ABBFA_002403	ABTW07_1341	ABTJ_02554	ACICU_01154	ACIAD1253	A1S_1176	ABAYE2595	ABZJ_01312	ABSDF1433
BJ-AB0715_01326	BJ-AB0868_01387	BJ-AB07104_01325	AB57_1312	ABK1_1610	ABBFA_002402	ABTW07_1342	ABTJ_02553	ACICU_01155	ACIAD1255	A1S_1177	ABAYE2594	ABZJ_01313	ABSDF1434
BJ-AB0715_01329	BJ-AB0868_01389	BJ-AB07104_01327	AB57_1315	ABK1_1612	ABBFA_002399	ABTW07_1344	ABTJ_02551	ACICU_01157	ACIAD1258	A1S_1179	ABAYE2592	ABZJ_01316	ABSDF1437
BJ-AB0715_01331	BJ-AB0868_01391	BJ-AB07104_01329	AB57_1316	ABK1_1614	ABBFA_002397	ABTW07_1346	ABTJ_02549	ACICU_01159	ACIAD1260	A1S_1180	ABAYE2590	ABZJ_01318	ABSDF1440
BJ-AB0715_01332	BJ-AB0868_01392	BJ-AB07104_01330	AB57_1317	ABK1_1615	ABBFA_002396	ABTW07_1347	ABTJ_02548	ACICU_01160	ACIAD1261	A1S_1181	ABAYE2589	ABZJ_01319	ABSDF1441
BJ-AB0715_01337	BJ-AB0868_01399	BJ-AB07104_01335	AB57_1322	ABK1_1620	ABBFA_002391	ABTW07_1352	ABTJ_02541	ACICU_01165	ACIAD1265	A1S_1186	ABAYE2583	ABZJ_01324	ABSDF1471
BJ-AB0715_01342	BJ-AB0868_01404	BJ-AB07104_01340	AB57_1327	ABK1_1625	ABBFA_002386	ABTW07_1357	ABTJ_02536	ACICU_01170	ACIAD1270	A1S_1190	ABAYE2578	ABZJ_01329	ABSDF1477
BJ-AB0715_01347	BJ-AB0868_01409	BJ-AB07104_01345	AB57_1333	ABK1_1630	ABBFA_002381	ABTW07_1362	ABTJ_02531	ACICU_01175	ACIAD1302	A1S_1196	ABAYE2572	ABZJ_01334	ABSDF1482
BJ-AB0715_01349	BJ-AB0868_01411	BJ-AB07104_01347	AB57_1335	ABK1_1632	ABBFA_002379	ABTW07_1364	ABTJ_02529	ACICU_01177	ACIAD1305	A1S_1199	ABAYE2570	ABZJ_01336	ABSDF1484
BJ-AB0715_01352	BJ-AB0868_01414	BJ-AB07104_01350	AB57_1338	ABK1_1635	ABBFA_002376	ABTW07_1367	ABTJ_02526	ACICU_01180	ACIAD1237	A1S_1202	ABAYE2567	ABZJ_01339	ABSDF1488
BJ-AB0715_01355	BJ-AB0868_01417	BJ-AB07104_01353	AB57_1341	ABK1_1638	ABBFA_002373	ABTW07_1370	ABTJ_02523	ACICU_01183	ACIAD2103	A1S_1205	ABAYE2564	ABZJ_01342	ABSDF1491
BJ-AB0715_01357	BJ-AB0868_01419	BJ-AB07104_01355	AB57_1343	ABK1_1640	ABBFA_002371	ABTW07_1372	ABTJ_02521	ACICU_01185	ACIAD2101	A1S_1208	ABAYE2562	ABZJ_01344	ABSDF1494
BJ-AB0715_01364	BJ-AB0868_01426	BJ-AB07104_01362	AB57_1350	ABK1_1647	ABBFA_002364	ABTW07_1379	ABTJ_02514	ACICU_01192	ACIAD1436	A1S_1215	ABAYE2555	ABZJ_01351	ABSDF1497
BJ-AB0715_01376	BJ-AB0868_01438	BJ-AB07104_01374	AB57_1362	ABK1_1659	ABBFA_002351	ABTW07_1391	ABTJ_02501	ACICU_01204	ACIAD1786	A1S_1224	ABAYE2541	ABZJ_01364	ABSDF2332
BJ-AB0715_01395	BJ-AB0868_01458	BJ-AB07104_01393	AB57_1408	ABK1_1678	ABBFA_002309	ABTW07_1407	ABTJ_02481	ACICU_01224	ACIAD1481	A1S_1235	ABAYE2493	ABZJ_01384	ABSDF2325
BJ-AB0715_01396	BJ-AB0868_01459	BJ-AB07104_01394	AB57_1409	ABK1_1679	ABBFA_002308	ABTW07_1408	ABTJ_02480	ACICU_01225	ACIAD1482	A1S_1236	ABAYE2492	ABZJ_01385	ABSDF2324
BJ-AB0715_01400	BJ-AB0868_01463	BJ-AB07104_01398	AB57_1413	ABK1_1683	ABBFA_002304	ABTW07_1412	ABTJ_02476	ACICU_01229	ACIAD1486	A1S_1240	ABAYE2488	ABZJ_01389	ABSDF2320
BJ-AB0715_01402	BJ-AB0868_01465	BJ-AB07104_01400	AB57_1415	ABK1_1685	ABBFA_002302	ABTW07_1414	ABTJ_02474	ACICU_01231	ACIAD1488	A1S_1242	ABAYE2486	ABZJ_01391	ABSDF2317
BJ-AB0715_01403	BJ-AB0868_01466	BJ-AB07104_01401	AB57_1416	ABK1_1686	ABBFA_002301	ABTW07_1415	ABTJ_02473	ACICU_01232	ACIAD1489	A1S_1243	ABAYE2485	ABZJ_01392	ABSDF2316
BJ-AB0715_01404	BJ-AB0868_01467	BJ-AB07104_01402	AB57_1417	ABK1_1687	ABBFA_002300	ABTW07_1416	ABTJ_02472	ACICU_01233	ACIAD1490	A1S_1244	ABAYE2484	ABZJ_01393	ABSDF1110
BJ-AB0715_01405	BJ-AB0868_01468	BJ-AB07104_01403	AB57_1418	ABK1_1688	ABBFA_002299	ABTW07_1417	ABTJ_02471	ACICU_01234	ACIAD1491	A1S_1245	ABAYE2483	ABZJ_01394	ABSDF1111
BJ-AB0715_01408	BJ-AB0868_01471	BJ-AB07104_01406	AB57_1421	ABK1_1691	ABBFA_002296	ABTW07_1420	ABTJ_02468	ACICU_01237	ACIAD1496	A1S_1248	ABAYE2480	ABZJ_01397	ABSDF1114
BJ-AB0715_01432	BJ-AB0868_01498	BJ-AB07104_01433	AB57_1452	ABK1_1715	ABBFA_002266	ABTW07_1443	ABTJ_02443	ACICU_01266	ACIAD2521	A1S_1266	ABAYE2442	ABZJ_01424	ABSDF2259
BJ-AB0715_01434	BJ-AB0868_01500	BJ-AB07104_01435	AB57_1454	ABK1_1717	ABBFA_002264	ABTW07_1445	ABTJ_02441	ACICU_01268	ACIAD2519	A1S_1268	ABAYE2440	ABZJ_01426	ABSDF2257
BJ-AB0715_01436	BJ-AB0868_01502	BJ-AB07104_01437	AB57_1456	ABK1_1719	ABBFA_002262	ABTW07_1447	ABTJ_02438	ACICU_01271	ACIAD2517	A1S_1270	ABAYE2438	ABZJ_01429	ABSDF2255
BJ-AB0715_01471	BJ-AB0868_01526	BJ-AB07104_01460	AB57_1480	ABK1_1743	ABBFA_002238	ABTW07_1469	ABTJ_02413	ACICU_01297	ACIAD2690	A1S_1295	ABAYE2414	ABZJ_01455	ABSDF2250
BJ-AB0715_01472	BJ-AB0868_01527	BJ-AB07104_01461	AB57_1481	ABK1_1744	ABBFA_002237	ABTW07_1470	ABTJ_02412	ACICU_01298	ACIAD2689	A1S_1296	ABAYE2413	ABZJ_01456	ABSDF2249
BJ-AB0715_01475	BJ-AB0868_01530	BJ-AB07104_01464	AB57_1484	ABK1_1747	ABBFA_002234	ABTW07_1473	ABTJ_02409	ACICU_01301	ACIAD2686	A1S_1300	ABAYE2410	ABZJ_01459	ABSDF2246
BJ-AB0715_01478	BJ-AB0868_01533	BJ-AB07104_01467	AB57_1487	ABK1_1752	ABBFA_002231	ABTW07_1476	ABTJ_02406	ACICU_01304	ACIAD2683	A1S_1304	ABAYE2407	ABZJ_01462	ABSDF2243
BJ-AB0715_01479	BJ-AB0868_01534	BJ-AB07104_01468	AB57_1488	ABK1_1753	ABBFA_002230	ABTW07_1477	ABTJ_02405	ACICU_01305	ACIAD2682	A1S_1305	ABAYE2406	ABZJ_01463	ABSDF2242
BJ-AB0715_01481	BJ-AB0868_01536	BJ-AB07104_01470	AB57_1490	ABK1_1755	ABBFA_002228	ABTW07_1479	ABTJ_02403	ACICU_01307	ACIAD2694	A1S_1307	ABAYE2404	ABZJ_01465	ABSDF2240
BJ-AB0715_01483	BJ-AB0868_01538	BJ-AB07104_01472	AB57_1492	ABK1_1757	ABBFA_002226	ABTW07_1481	ABTJ_02401	ACICU_01309	ACIAD2696	A1S_1309	ABAYE2402	ABZJ_01467	ABSDF2238
BJ-AB0715_01493	BJ-AB0868_01548	BJ-AB07104_01482	AB57_1502	ABK1_1767	ABBFA_002216	ABTW07_1491	ABTJ_02391	ACICU_01319	ACIAD2098	A1S_1319	ABAYE2392	ABZJ_01477	ABSDF2228
BJ-AB0715_02278	BJ-AB0868_02379	BJ-AB07104_01603	AB57_2361	ABK1_2602	ABBFA_001435	ABTW07_2342	ABTJ_01572	ACICU_02138	ACIAD1735	A1S_2012	ABAYE1536	ABZJ_02320	ABSDF2191
BJ-AB0715_02277	BJ-AB0868_02378	BJ-AB07104_01604	AB57_2360	ABK1_2601	ABBFA_001436	ABTW07_2341	ABTJ_01573	ACICU_02137	ACIAD1736	A1S_2011	ABAYE1537	ABZJ_02319	ABSDF2190
BJ-AB0715_02276	BJ-AB0868_02377	BJ-AB07104_01605	AB57_2359	ABK1_2600	ABBFA_001437	ABTW07_2340	ABTJ_01574	ACICU_02136	ACIAD1737	A1S_2010	ABAYE1538	ABZJ_02318	ABSDF2189
BJ-AB0715_02275	BJ-AB0868_02376	BJ-AB07104_01606	AB57_2358	ABK1_2599	ABBFA_001438	ABTW07_2339	ABTJ_01575	ACICU_02135	ACIAD1738	A1S_2009	ABAYE1539	ABZJ_02317	ABSDF2188
BJ-AB0715_02268	BJ-AB0868_02370	BJ-AB07104_01614	AB57_2351	ABK1_2593	ABBFA_001443	ABTW07_2333	ABTJ_01582	ACICU_02128	ACIAD1908	A1S_2002	ABAYE1546	ABZJ_02310	ABSDF1524
BJ-AB0715_02267	BJ-AB0868_02369	BJ-AB07104_01615	AB57_2350	ABK1_2592	ABBFA_001444	ABTW07_2332	ABTJ_01583	ACICU_02127	ACIAD1907	A1S_2001	ABAYE1547	ABZJ_02309	ABSDF1525
BJ-AB0715_02260	BJ-AB0868_02362	BJ-AB07104_01622	AB57_2341	ABK1_2585	ABBFA_001450	ABTW07_2325	ABTJ_01590	ACICU_02120	ACIAD1545	A1S_1994	ABAYE1554	ABZJ_02302	ABSDF1657
BJ-AB0715_02259	BJ-AB0868_02361	BJ-AB07104_01623	AB57_2342	ABK1_2584	ABBFA_001451	ABTW07_2324	ABTJ_01591	ACICU_02119	ACIAD1897	A1S_1993	ABAYE1555	ABZJ_02301	ABSDF1658
BJ-AB0715_02257	BJ-AB0868_02359	BJ-AB07104_01625	AB57_2339	ABK1_2582	ABBFA_001453	ABTW07_2322	ABTJ_01593	ACICU_02117	ACIAD1895	A1S_1991	ABAYE1558	ABZJ_02299	ABSDF1660
BJ-AB0715_02254	BJ-AB0868_02356	BJ-AB07104_01628	AB57_2336	ABK1_2579	ABBFA_001456	ABTW07_2319	ABTJ_01596	ACICU_02114	ACIAD1892	A1S_1988	ABAYE1561	ABZJ_02296	ABSDF1663
BJ-AB0715_02249	BJ-AB0868_02351	BJ-AB07104_01633	AB57_2331	ABK1_2574	ABBFA_001461	ABTW07_2314	ABTJ_01601	ACICU_02108	ACIAD1889	A1S_1985	ABAYE1566	ABZJ_02291	ABSDF1669
BJ-AB0715_02248	BJ-AB0868_02350	BJ-AB07104_01634	AB57_2330	ABK1_2573	ABBFA_001462	ABTW07_2313	ABTJ_01603	ACICU_02107	ACIAD1998	A1S_1984	ABAYE1567	ABZJ_02290	ABSDF1670
BJ-AB0715_02247	BJ-AB0868_02349	BJ-AB07104_01635	AB57_2329	ABK1_2572	ABBFA_001463	ABTW07_2312	ABTJ_01604	ACICU_02106	ACIAD1997	A1S_1983	ABAYE1568	ABZJ_02289	ABSDF1671
BJ-AB0715_02246	BJ-AB0868_02348	BJ-AB07104_01636	AB57_2327	ABK1_2571	ABBFA_001464	ABTW07_2311	ABTJ_01605	ACICU_02105	ACIAD1996	A1S_1982	ABAYE1569	ABZJ_02288	ABSDF1672
BJ-AB0715_02245	BJ-AB0868_02347	BJ-AB07104_01637	AB57_2328	ABK1_2570	ABBFA_001465	ABTW07_2310	ABTJ_01606	ACICU_02104	ACIAD1995	A1S_1981	ABAYE1570	ABZJ_02287	ABSDF1673
BJ-AB0715_02244	BJ-AB0868_02346	BJ-AB07104_01638	AB57_2326	ABK1_2569	ABBFA_001466	ABTW07_2309	ABTJ_01607	ACICU_02103	ACIAD1366	A1S_1980	ABAYE1571	ABZJ_02286	ABSDF1675
BJ-AB0715_02239	BJ-AB0868_02344	BJ-AB07104_01640	AB57_2324	ABK1_2566	ABBFA_001468	ABTW07_2307	ABTJ_01609	ACICU_02101	ACIAD1368	A1S_1978	ABAYE1573	ABZJ_02282	ABSDF1677
BJ-AB0715_02236	BJ-AB0868_02341	BJ-AB07104_01643	AB57_2321	ABK1_2563	ABBFA_001471	ABTW07_2305	ABTJ_01611	ACICU_02099	ACIAD1371	A1S_1976	ABAYE1576	ABZJ_02279	ABSDF1679
BJ-AB0715_02235	BJ-AB0868_02340	BJ-AB07104_01644	AB57_2320	ABK1_2562	ABBFA_001472	ABTW07_2304	ABTJ_01612	ACICU_02098	ACIAD1372	A1S_1975	ABAYE1577	ABZJ_02278	ABSDF1680
BJ-AB0715_02233	BJ-AB0868_02338	BJ-AB07104_01646	AB57_2318	ABK1_2560	ABBFA_001474	ABTW07_2302	ABTJ_01614	ACICU_02096	ACIAD1374	A1S_1973	ABAYE1579	ABZJ_02276	ABSDF1682
BJ-AB0715_02231	BJ-AB0868_02336	BJ-AB07104_01648	AB57_2316	ABK1_2558	ABBFA_001475	ABTW07_2300	ABTJ_01616	ACICU_02094	ACIAD1376	A1S_1971	ABAYE1581	ABZJ_02274	ABSDF1684
BJ-AB0715_02230	BJ-AB0868_02335	BJ-AB07104_01649	AB57_2315	ABK1_2557	ABBFA_001476	ABTW07_2299	ABTJ_01617	ACICU_02093	ACIAD1377	A1S_1970	ABAYE1582	ABZJ_02273	ABSDF1685
BJ-AB0715_02229	BJ-AB0868_02334	BJ-AB07104_01650	AB57_2314	ABK1_2556	ABBFA_001477	ABTW07_2298	ABTJ_01618	ACICU_02092	ACIAD1378	A1S_1969	ABAYE1583	ABZJ_02272	ABSDF1686
BJ-AB0715_02228	BJ-AB0868_02333	BJ-AB07104_01651	AB57_2313	ABK1_2555	ABBFA_001478	ABTW07_2297	ABTJ_01619	ACICU_02091	ACIAD1379	A1S_1968	ABAYE1584	ABZJ_02271	ABSDF1687
BJ-AB0715_02227	BJ-AB0868_02332	BJ-AB07104_01652	AB57_2312	ABK1_2554	ABBFA_001479	ABTW07_2296	ABTJ_01620	ACICU_02090	ACIAD1380	A1S_1967	ABAYE1585	ABZJ_02270	ABSDF1688
BJ-AB0715_02226	BJ-AB0868_02331	BJ-AB07104_01653	AB57_2311	ABK1_2553	ABBFA_001480	ABTW07_2295	ABTJ_01621	ACICU_02089	ACIAD1381	A1S_1966	ABAYE1586	ABZJ_02269	ABSDF1689
BJ-AB0715_02225	BJ-AB0868_02330	BJ-AB07104_01654	AB57_2310	ABK1_2552	ABBFA_001481	ABTW07_2294	ABTJ_01622	ACICU_02088	ACIAD1382	A1S_1965	ABAYE1587	ABZJ_02268	ABSDF1690
BJ-AB0715_02224	BJ-AB0868_02329	BJ-AB07104_01655	AB57_2309	ABK1_2551	ABBFA_001482	ABTW07_2293	ABTJ_01623	ACICU_02087	ACIAD1383	A1S_1964	ABAYE1588	ABZJ_02267	ABSDF1691
BJ-AB0715_02223	BJ-AB0868_02328	BJ-AB07104_01656	AB57_2308	ABK1_2550	ABBFA_001483	ABTW07_2292	ABTJ_01625	ACICU_02086	ACIAD1384	A1S_1963	ABAYE1589	ABZJ_02265	ABSDF1693
BJ-AB0715_02222	BJ-AB0868_02327	BJ-AB07104_01657	AB57_2307	ABK1_2549	ABBFA_001484	ABTW07_2291	ABTJ_01626	ACICU_02085	ACIAD1385	A1S_1962	ABAYE1590	ABZJ_02264	ABSDF1694
BJ-AB0715_02195	BJ-AB0868_02299	BJ-AB07104_01685	AB57_2279	ABK1_2522	ABBFA_001510	ABTW07_2266	ABTJ_01654	ACICU_02056	ACIAD1988	A1S_1941	ABAYE1619	ABZJ_02237	ABSDF2094
BJ-AB0715_02194	BJ-AB0868_02298	BJ-AB07104_01686	AB57_2278	ABK1_2521	ABBFA_001511	ABTW07_2265	ABTJ_01655	ACICU_02055	ACIAD1987	A1S_1940	ABAYE1621	ABZJ_02236	ABSDF2093
BJ-AB0715_02192	BJ-AB0868_02296	BJ-AB07104_01688	AB57_2276	ABK1_2519	ABBFA_001513	ABTW07_2263	ABTJ_01657	ACICU_02053	ACIAD1658	A1S_1938	ABAYE1623	ABZJ_02234	ABSDF2090
BJ-AB0715_02188	BJ-AB0868_02292	BJ-AB07104_01692	AB57_2272	ABK1_2515	ABBFA_001517	ABTW07_2259	ABTJ_01661	ACICU_02049	ACIAD2303	A1S_1934	ABAYE1627	ABZJ_02230	ABSDF2086
BJ-AB0715_02186	BJ-AB0868_02290	BJ-AB07104_01694	AB57_2270	ABK1_2514	ABBFA_001519	ABTW07_2257	ABTJ_01662	ACICU_02048	ACIAD2302	A1S_1933	ABAYE1628	ABZJ_02229	ABSDF2084
BJ-AB0715_02185	BJ-AB0868_02289	BJ-AB07104_01695	AB57_2269	ABK1_2513	ABBFA_001520	ABTW07_2256	ABTJ_01663	ACICU_02047	ACIAD2301	A1S_1932	ABAYE1629	ABZJ_02228	ABSDF2083
BJ-AB0715_02183	BJ-AB0868_02287	BJ-AB07104_01697	AB57_2267	ABK1_2511	ABBFA_001522	ABTW07_2254	ABTJ_01665	ACICU_02045	ACIAD2296	A1S_1930	ABAYE1631	ABZJ_02226	ABSDF2081
BJ-AB0715_02181	BJ-AB0868_02285	BJ-AB07104_01699	AB57_2265	ABK1_2509	ABBFA_001524	ABTW07_2252	ABTJ_01667	ACICU_02043	ACIAD2294	A1S_1928	ABAYE1634	ABZJ_02224	ABSDF2077
BJ-AB0715_02178	BJ-AB0868_02282	BJ-AB07104_01702	AB57_2263	ABK1_2506	ABBFA_001526	ABTW07_2249	ABTJ_01671	ACICU_02040	ACIAD2291	A1S_1925	ABAYE1636	ABZJ_02220	ABSDF2071
BJ-AB0715_02177	BJ-AB0868_02281	BJ-AB07104_01703	AB57_2262	ABK1_2505	ABBFA_001527	ABTW07_2248	ABTJ_01672	ACICU_02039	ACIAD2290	A1S_1924	ABAYE1637	ABZJ_02219	ABSDF2070
BJ-AB0715_02174	BJ-AB0868_02280	BJ-AB07104_01704	AB57_2261	ABK1_2503	ABBFA_001528	ABTW07_2247	ABTJ_01674	ACICU_02035	ACIAD1349	A1S_1923	ABAYE1641	ABZJ_02217	ABSDF2066
BJ-AB0715_02172	BJ-AB0868_02278	BJ-AB07104_01706	AB57_2259	ABK1_2501	ABBFA_001530	ABTW07_2245	ABTJ_01676	ACICU_02033	ACIAD1351	A1S_1922	ABAYE1643	ABZJ_02215	ABSDF2064
BJ-AB0715_02170	BJ-AB0868_02276	BJ-AB07104_01708	AB57_2256	ABK1_2498	ABBFA_001532	ABTW07_2243	ABTJ_01678	ACICU_02031	ACIAD1353	A1S_1920	ABAYE1645	ABZJ_02213	ABSDF2061
BJ-AB0715_02168	BJ-AB0868_02274	BJ-AB07104_01710	AB57_2254	ABK1_2496	ABBFA_001534	ABTW07_2241	ABTJ_01680	ACICU_02029	ACIAD1355	A1S_1918	ABAYE1647	ABZJ_02211	ABSDF2058
BJ-AB0715_02167	BJ-AB0868_02273	BJ-AB07104_01711	AB57_2253	ABK1_2495	ABBFA_001535	ABTW07_2240	ABTJ_01681	ACICU_02028	ACIAD1356	A1S_1917	ABAYE1648	ABZJ_02210	ABSDF2057
BJ-AB0715_02166	BJ-AB0868_02272	BJ-AB07104_01712	AB57_2252	ABK1_2494	ABBFA_001536	ABTW07_2239	ABTJ_01682	ACICU_02027	ACIAD1357	A1S_1916	ABAYE1649	ABZJ_02209	ABSDF2056
BJ-AB0715_02164	BJ-AB0868_02270	BJ-AB07104_01714	AB57_2249	ABK1_2492	ABBFA_001538	ABTW07_2237	ABTJ_01684	ACICU_02025	ACIAD1359	A1S_1914	ABAYE1651	ABZJ_02207	ABSDF2054
BJ-AB0715_02161	BJ-AB0868_02267	BJ-AB07104_01716	AB57_2247	ABK1_2490	ABBFA_001541	ABTW07_2235	ABTJ_01686	ACICU_02023	ACIAD1360	A1S_1913	ABAYE1653	ABZJ_02204	ABSDF2051
BJ-AB0715_02160	BJ-AB0868_02266	BJ-AB07104_01717	AB57_2246	ABK1_2489	ABBFA_001542	ABTW07_2234	ABTJ_01687	ACICU_02022	ACIAD1361	A1S_1912	ABAYE1654	ABZJ_02203	ABSDF2050
BJ-AB0715_02158	BJ-AB0868_02264	BJ-AB07104_01719	AB57_2244	ABK1_2487	ABBFA_001544	ABTW07_2232	ABTJ_01689	ACICU_02020	ACIAD1363	A1S_1910	ABAYE1656	ABZJ_02201	ABSDF2048
BJ-AB0715_02157	BJ-AB0868_02263	BJ-AB07104_01720	AB57_2243	ABK1_2486	ABBFA_001545	ABTW07_2231	ABTJ_01690	ACICU_02019	ACIAD1364	A1S_1909	ABAYE1657	ABZJ_02200	ABSDF2047
BJ-AB0715_02156	BJ-AB0868_02262	BJ-AB07104_01721	AB57_2242	ABK1_2485	ABBFA_001546	ABTW07_2230	ABTJ_01691	ACICU_02018	ACIAD1878	A1S_1908	ABAYE1658	ABZJ_02199	ABSDF2046
BJ-AB0715_02155	BJ-AB0868_02261	BJ-AB07104_01722	AB57_2241	ABK1_2484	ABBFA_001547	ABTW07_2229	ABTJ_01692	ACICU_02017	ACIAD1652	A1S_1907	ABAYE1659	ABZJ_02198	ABSDF2045
BJ-AB0715_02154	BJ-AB0868_02260	BJ-AB07104_01723	AB57_2240	ABK1_2483	ABBFA_001548	ABTW07_2228	ABTJ_01693	ACICU_02016	ACIAD1653	A1S_1906	ABAYE1660	ABZJ_02197	ABSDF2044
BJ-AB0715_02145	BJ-AB0868_02253	BJ-AB07104_01730	AB57_2232	ABK1_2476	ABBFA_001555	ABTW07_2221	ABTJ_01700	ACICU_02009	ACIAD2003	A1S_1900	ABAYE1667	ABZJ_02190	ABSDF2034
BJ-AB0715_02144	BJ-AB0868_02252	BJ-AB07104_01731	AB57_2231	ABK1_2475	ABBFA_001556	ABTW07_2220	ABTJ_01701	ACICU_02008	ACIAD2002	A1S_1899	ABAYE1668	ABZJ_02189	ABSDF2033
BJ-AB0715_02143	BJ-AB0868_02251	BJ-AB07104_01732	AB57_2230	ABK1_2474	ABBFA_001557	ABTW07_2219	ABTJ_01702	ACICU_02007	ACIAD2001	A1S_1898	ABAYE1669	ABZJ_02188	ABSDF2032
BJ-AB0715_02136	BJ-AB0868_02244	BJ-AB07104_01739	AB57_2223	ABK1_2467	ABBFA_001564	ABTW07_2211	ABTJ_01709	ACICU_01999	ACIAD1707	A1S_1890	ABAYE1676	ABZJ_02181	ABSDF2021
BJ-AB0715_02135	BJ-AB0868_02243	BJ-AB07104_01740	AB57_2222	ABK1_2466	ABBFA_001565	ABTW07_2210	ABTJ_01710	ACICU_01998	ACIAD1708	A1S_1889	ABAYE1677	ABZJ_02180	ABSDF2020
BJ-AB0715_02133	BJ-AB0868_02241	BJ-AB07104_01742	AB57_2220	ABK1_2464	ABBFA_001567	ABTW07_2208	ABTJ_01712	ACICU_01996	ACIAD1710	A1S_1886	ABAYE1679	ABZJ_02178	ABSDF2018
BJ-AB0715_02132	BJ-AB0868_02240	BJ-AB07104_01743	AB57_2219	ABK1_2463	ABBFA_001568	ABTW07_2207	ABTJ_01713	ACICU_01995	ACIAD1711	A1S_1885	ABAYE1680	ABZJ_02177	ABSDF2017
BJ-AB0715_02129	BJ-AB0868_02237	BJ-AB07104_01746	AB57_2216	ABK1_2460	ABBFA_001571	ABTW07_2204	ABTJ_01716	ACICU_01992	ACIAD1714	A1S_1882	ABAYE1683	ABZJ_02174	ABSDF2013
BJ-AB0715_02126	BJ-AB0868_02235	BJ-AB07104_01748	AB57_2214	ABK1_2458	ABBFA_001573	ABTW07_2202	ABTJ_01718	ACICU_01990	ACIAD1716	A1S_1880	ABAYE1685	ABZJ_02172	ABSDF2011
BJ-AB0715_02123	BJ-AB0868_02232	BJ-AB07104_01751	AB57_2211	ABK1_2455	ABBFA_001576	ABTW07_2199	ABTJ_01721	ACICU_01987	ACIAD1677	A1S_1877	ABAYE1688	ABZJ_02169	ABSDF2008
BJ-AB0715_02121	BJ-AB0868_02230	BJ-AB07104_01753	AB57_2209	ABK1_2453	ABBFA_001578	ABTW07_2197	ABTJ_01723	ACICU_01985	ACIAD1702	A1S_1875	ABAYE1690	ABZJ_02167	ABSDF2005
BJ-AB0715_02098	BJ-AB0868_02207	BJ-AB07104_01777	AB57_2185	ABK1_2429	ABBFA_001602	ABTW07_2174	ABTJ_01746	ACICU_01962	ACIAD1451	A1S_1850	ABAYE1714	ABZJ_02143	ABSDF2000
BJ-AB0715_02094	BJ-AB0868_02203	BJ-AB07104_01781	AB57_2181	ABK1_2425	ABBFA_001608	ABTW07_2169	ABTJ_01750	ACICU_01958	ACIAD1442	A1S_1845	ABAYE1718	ABZJ_02139	ABSDF1996
BJ-AB0715_02093	BJ-AB0868_02202	BJ-AB07104_01782	AB57_2180	ABK1_2424	ABBFA_001609	ABTW07_2168	ABTJ_01751	ACICU_01957	ACIAD1447	A1S_1844	ABAYE1719	ABZJ_02138	ABSDF1995
BJ-AB0715_02010	BJ-AB0868_02112	BJ-AB07104_01870	AB57_2115	ABK1_2330	ABBFA_001674	ABTW07_2078	ABTJ_01837	ACICU_01869	ACIAD0964	A1S_1781	ABAYE1789	ABZJ_02050	ABSDF1961
BJ-AB0715_02009	BJ-AB0868_02111	BJ-AB07104_01871	AB57_2114	ABK1_2329	ABBFA_001675	ABTW07_2077	ABTJ_01838	ACICU_01868	ACIAD0963	A1S_1780	ABAYE1790	ABZJ_02049	ABSDF1962
BJ-AB0715_02008	BJ-AB0868_02110	BJ-AB07104_01872	AB57_2113	ABK1_2328	ABBFA_001676	ABTW07_2076	ABTJ_01839	ACICU_01867	ACIAD0962	A1S_1779	ABAYE1791	ABZJ_02048	ABSDF1963
BJ-AB0715_01919	BJ-AB0868_01984	BJ-AB07104_01996	AB57_1938	ABK1_2204	ABBFA_001786	ABTW07_1958	ABTJ_01963	ACICU_01745	ACIAD1625	A1S_1710	ABAYE1938	ABZJ_01910	ABSDF1939
BJ-AB0715_01914	BJ-AB0868_01979	BJ-AB07104_02001	AB57_1933	ABK1_2199	ABBFA_001791	ABTW07_1953	ABTJ_01968	ACICU_01740	ACIAD1021	A1S_1705	ABAYE1943	ABZJ_01905	ABSDF1934
BJ-AB0715_01913	BJ-AB0868_01978	BJ-AB07104_02002	AB57_1932	ABK1_2198	ABBFA_001792	ABTW07_1952	ABTJ_01969	ACICU_01739	ACIAD1022	A1S_1704	ABAYE1944	ABZJ_01904	ABSDF1933
BJ-AB0715_01904	BJ-AB0868_01969	BJ-AB07104_02011	AB57_1923	ABK1_2189	ABBFA_001801	ABTW07_1943	ABTJ_01978	ACICU_01730	ACIAD2028	A1S_1694	ABAYE1953	ABZJ_01895	ABSDF1930
BJ-AB0715_01900	BJ-AB0868_01965	BJ-AB07104_02015	AB57_1919	ABK1_2185	ABBFA_001805	ABTW07_1939	ABTJ_01982	ACICU_01726	ACIAD2307	A1S_1690	ABAYE1958	ABZJ_01891	ABSDF1925
BJ-AB0715_01898	BJ-AB0868_01963	BJ-AB07104_02017	AB57_1916	ABK1_2183	ABBFA_001807	ABTW07_1937	ABTJ_01984	ACICU_01724	ACIAD2309	A1S_1688	ABAYE1960	ABZJ_01889	ABSDF1923
BJ-AB0715_01893	BJ-AB0868_01958	BJ-AB07104_02022	AB57_1910	ABK1_2178	ABBFA_001812	ABTW07_1932	ABTJ_01989	ACICU_01719	ACIAD2312	A1S_1685	ABAYE1966	ABZJ_01884	ABSDF1915
BJ-AB0715_01892	BJ-AB0868_01957	BJ-AB07104_02023	AB57_1909	ABK1_2177	ABBFA_001813	ABTW07_1931	ABTJ_01990	ACICU_01718	ACIAD2313	A1S_1684	ABAYE1967	ABZJ_01883	ABSDF1914
BJ-AB0715_01890	BJ-AB0868_01955	BJ-AB07104_02025	AB57_1907	ABK1_2175	ABBFA_001815	ABTW07_1929	ABTJ_01992	ACICU_01716	ACIAD2314	A1S_1683	ABAYE1970	ABZJ_01878	ABSDF1912
BJ-AB0715_01885	BJ-AB0868_01949	BJ-AB07104_02031	AB57_1902	ABK1_2169	ABBFA_001820	ABTW07_1924	ABTJ_01997	ACICU_01710	ACIAD1799	A1S_1680	ABAYE1975	ABZJ_01872	ABSDF1906
BJ-AB0715_01883	BJ-AB0868_01947	BJ-AB07104_02033	AB57_1900	ABK1_2167	ABBFA_001822	ABTW07_1922	ABTJ_01999	ACICU_01708	ACIAD2317	A1S_1679	ABAYE1977	ABZJ_01870	ABSDF1902
BJ-AB0715_01881	BJ-AB0868_01945	BJ-AB07104_02035	AB57_1898	ABK1_2165	ABBFA_001824	ABTW07_1920	ABTJ_02001	ACICU_01706	ACIAD2319	A1S_1677	ABAYE1979	ABZJ_01868	ABSDF1900
BJ-AB0715_01879	BJ-AB0868_01943	BJ-AB07104_02037	AB57_1896	ABK1_2163	ABBFA_001826	ABTW07_1918	ABTJ_02003	ACICU_01704	ACIAD2322	A1S_1675	ABAYE1981	ABZJ_01866	ABSDF1898
BJ-AB0715_01872	BJ-AB0868_01936	BJ-AB07104_02044	AB57_1894	ABK1_2156	ABBFA_001828	ABTW07_1911	ABTJ_02010	ACICU_01697	ACIAD2324	A1S_1668	ABAYE1983	ABZJ_01859	ABSDF1889
BJ-AB0715_01867	BJ-AB0868_01931	BJ-AB07104_02049	AB57_1890	ABK1_2151	ABBFA_001832	ABTW07_1907	ABTJ_02015	ACICU_01692	ACIAD2329	A1S_1665	ABAYE1988	ABZJ_01854	ABSDF1886
BJ-AB0715_01866	BJ-AB0868_01930	BJ-AB07104_02050	AB57_1889	ABK1_2150	ABBFA_001833	ABTW07_1906	ABTJ_02016	ACICU_01691	ACIAD2330	A1S_1664	ABAYE1989	ABZJ_01853	ABSDF1885
BJ-AB0715_01864	BJ-AB0868_01928	BJ-AB07104_02052	AB57_1887	ABK1_2148	ABBFA_001835	ABTW07_1904	ABTJ_02018	ACICU_01689	ACIAD1671	A1S_1662	ABAYE1991	ABZJ_01851	ABSDF1882
BJ-AB0715_01843	BJ-AB0868_01908	BJ-AB07104_02072	AB57_1867	ABK1_2128	ABBFA_001854	ABTW07_1886	ABTJ_02037	ACICU_01670	ACIAD1415	A1S_1645	ABAYE2010	ABZJ_01831	ABSDF1864
BJ-AB0715_01842	BJ-AB0868_01907	BJ-AB07104_02073	AB57_1866	ABK1_2127	ABBFA_001855	ABTW07_1885	ABTJ_02038	ACICU_01669	ACIAD1414	A1S_1644	ABAYE2011	ABZJ_01830	ABSDF1863
BJ-AB0715_01840	BJ-AB0868_01905	BJ-AB07104_02076	AB57_1864	ABK1_2125	ABBFA_001857	ABTW07_1883	ABTJ_02040	ACICU_01667	ACIAD1412	A1S_1642	ABAYE2013	ABZJ_01828	ABSDF1861
BJ-AB0715_01837	BJ-AB0868_01903	BJ-AB07104_02078	AB57_1862	ABK1_2123	ABBFA_001859	ABTW07_1881	ABTJ_02042	ACICU_01665	ACIAD1410	A1S_1640	ABAYE2015	ABZJ_01826	ABSDF1859
BJ-AB0715_01835	BJ-AB0868_01901	BJ-AB07104_02080	AB57_1860	ABK1_2121	ABBFA_001861	ABTW07_1879	ABTJ_02044	ACICU_01663	ACIAD1408	A1S_1637	ABAYE2017	ABZJ_01824	ABSDF1857
BJ-AB0715_01832	BJ-AB0868_01898	BJ-AB07104_02083	AB57_1857	ABK1_2118	ABBFA_001864	ABTW07_1876	ABTJ_02047	ACICU_01660	ACIAD1405	A1S_1634	ABAYE2020	ABZJ_01821	ABSDF1854
BJ-AB0715_01828	BJ-AB0868_01894	BJ-AB07104_02087	AB57_1853	ABK1_2114	ABBFA_001868	ABTW07_1872	ABTJ_02051	ACICU_01656	ACIAD1400	A1S_1629	ABAYE2024	ABZJ_01817	ABSDF1850
BJ-AB0715_01827	BJ-AB0868_01893	BJ-AB07104_02088	AB57_1852	ABK1_2113	ABBFA_001869	ABTW07_1871	ABTJ_02052	ACICU_01655	ACIAD1399	A1S_1628	ABAYE2025	ABZJ_01816	ABSDF1849
BJ-AB0715_01824	BJ-AB0868_01890	BJ-AB07104_02091	AB57_1849	ABK1_2110	ABBFA_001872	ABTW07_1868	ABTJ_02055	ACICU_01651	ACIAD1396	A1S_1624	ABAYE2028	ABZJ_01814	ABSDF1844
BJ-AB0715_01823	BJ-AB0868_01889	BJ-AB07104_02092	AB57_1848	ABK1_2109	ABBFA_001873	ABTW07_1867	ABTJ_02056	ACICU_01650	ACIAD1395	A1S_1623	ABAYE2029	ABZJ_01813	ABSDF1843
BJ-AB0715_01819	BJ-AB0868_01885	BJ-AB07104_02096	AB57_1844	ABK1_2105	ABBFA_001877	ABTW07_1863	ABTJ_02060	ACICU_01646	ACIAD1391	A1S_1619	ABAYE2033	ABZJ_01809	ABSDF1835
BJ-AB0715_01817	BJ-AB0868_01883	BJ-AB07104_02098	AB57_1842	ABK1_2103	ABBFA_001879	ABTW07_1861	ABTJ_02062	ACICU_01644	ACIAD1389	A1S_1617	ABAYE2035	ABZJ_01807	ABSDF1833
BJ-AB0715_01816	BJ-AB0868_01882	BJ-AB07104_02099	AB57_1841	ABK1_2102	ABBFA_001880	ABTW07_1860	ABTJ_02063	ACICU_01643	ACIAD1388	A1S_1616	ABAYE2036	ABZJ_01806	ABSDF1832
BJ-AB0715_01813	BJ-AB0868_01879	BJ-AB07104_02102	AB57_1838	ABK1_2099	ABBFA_001883	ABTW07_1857	ABTJ_02066	ACICU_01640	ACIAD2334	A1S_1614	ABAYE2039	ABZJ_01803	ABSDF1829
BJ-AB0715_01801	BJ-AB0868_01866	BJ-AB07104_02115	AB57_1825	ABK1_2086	ABBFA_001896	ABTW07_1844	ABTJ_02080	ACICU_01627	ACIAD2335	A1S_1601	ABAYE2053	ABZJ_01789	ABSDF1817
BJ-AB0715_01800	BJ-AB0868_01865	BJ-AB07104_02116	AB57_1824	ABK1_2085	ABBFA_001897	ABTW07_1843	ABTJ_02081	ACICU_01626	ACIAD2336	A1S_1579	ABAYE2054	ABZJ_01788	ABSDF1746
BJ-AB0715_01797	BJ-AB0868_01862	BJ-AB07104_02119	AB57_1820	ABK1_2082	ABBFA_001900	ABTW07_1840	ABTJ_02084	ACICU_01623	ACIAD2340	A1S_1576	ABAYE2057	ABZJ_01785	ABSDF1742
BJ-AB0715_01796	BJ-AB0868_01861	BJ-AB07104_02120	AB57_1821	ABK1_2081	ABBFA_001901	ABTW07_1839	ABTJ_02085	ACICU_01622	ACIAD2341	A1S_1575	ABAYE2058	ABZJ_01784	ABSDF1741
BJ-AB0715_01794	BJ-AB0868_01859	BJ-AB07104_02122	AB57_1818	ABK1_2079	ABBFA_001903	ABTW07_1837	ABTJ_02087	ACICU_01620	ACIAD2346	A1S_1573	ABAYE2060	ABZJ_01782	ABSDF1739
BJ-AB0715_01793	BJ-AB0868_01858	BJ-AB07104_02123	AB57_1817	ABK1_2078	ABBFA_001904	ABTW07_1836	ABTJ_02088	ACICU_01619	ACIAD2347	A1S_1572	ABAYE2061	ABZJ_01781	ABSDF1738
BJ-AB0715_01792	BJ-AB0868_01857	BJ-AB07104_02124	AB57_1816	ABK1_2077	ABBFA_001905	ABTW07_1835	ABTJ_02089	ACICU_01618	ACIAD2348	A1S_1571	ABAYE2062	ABZJ_01780	ABSDF1737
BJ-AB0715_01789	BJ-AB0868_01854	BJ-AB07104_02127	AB57_1813	ABK1_2074	ABBFA_001908	ABTW07_1832	ABTJ_02092	ACICU_01615	ACIAD2351	A1S_1568	ABAYE2065	ABZJ_01777	ABSDF1735
BJ-AB0715_01788	BJ-AB0868_01853	BJ-AB07104_02128	AB57_1812	ABK1_2073	ABBFA_001909	ABTW07_1831	ABTJ_02093	ACICU_01614	ACIAD2352	A1S_1567	ABAYE2066	ABZJ_01776	ABSDF1734
BJ-AB0715_01784	BJ-AB0868_01849	BJ-AB07104_02133	AB57_1808	ABK1_2069	ABBFA_001913	ABTW07_1827	ABTJ_02098	ACICU_01610	ACIAD2356	A1S_1563	ABAYE2070	ABZJ_01772	ABSDF1730
BJ-AB0715_01782	BJ-AB0868_01847	BJ-AB07104_02135	AB57_1806	ABK1_2067	ABBFA_001915	ABTW07_1825	ABTJ_02100	ACICU_01608	ACIAD2358	A1S_1561	ABAYE2072	ABZJ_01770	ABSDF1728
BJ-AB0715_01781	BJ-AB0868_01846	BJ-AB07104_02136	AB57_1805	ABK1_2066	ABBFA_001916	ABTW07_1824	ABTJ_02101	ACICU_01607	ACIAD2359	A1S_1560	ABAYE2073	ABZJ_01769	ABSDF1727
BJ-AB0715_01779	BJ-AB0868_01844	BJ-AB07104_02138	AB57_1803	ABK1_2064	ABBFA_001918	ABTW07_1822	ABTJ_02103	ACICU_01605	ACIAD2361	A1S_1558	ABAYE2075	ABZJ_01767	ABSDF1725
BJ-AB0715_01776	BJ-AB0868_01841	BJ-AB07104_02141	AB57_1799	ABK1_2061	ABBFA_001921	ABTW07_1819	ABTJ_02106	ACICU_01602	ACIAD2365	A1S_1555	ABAYE2078	ABZJ_01764	ABSDF1722
BJ-AB0715_01770	BJ-AB0868_01835	BJ-AB07104_02147	AB57_1793	ABK1_2055	ABBFA_001927	ABTW07_1813	ABTJ_02112	ACICU_01596	ACIAD2369	A1S_1549	ABAYE2084	ABZJ_01758	ABSDF1716
BJ-AB0715_01769	BJ-AB0868_01834	BJ-AB07104_02148	AB57_1792	ABK1_2054	ABBFA_001928	ABTW07_1812	ABTJ_02113	ACICU_01595	ACIAD2370	A1S_1548	ABAYE2085	ABZJ_01757	ABSDF1715
BJ-AB0715_01767	BJ-AB0868_01832	BJ-AB07104_02150	AB57_1790	ABK1_2052	ABBFA_001930	ABTW07_1810	ABTJ_02115	ACICU_01593	ACIAD2372	A1S_1545	ABAYE2087	ABZJ_01755	ABSDF1713
BJ-AB0715_01766	BJ-AB0868_01831	BJ-AB07104_02151	AB57_1789	ABK1_2051	ABBFA_001931	ABTW07_1809	ABTJ_02116	ACICU_01592	ACIAD1925	A1S_1544	ABAYE2088	ABZJ_01754	ABSDF1712
BJ-AB0715_01764	BJ-AB0868_01829	BJ-AB07104_02153	AB57_1787	ABK1_2049	ABBFA_001933	ABTW07_1807	ABTJ_02118	ACICU_01590	ACIAD1927	A1S_1543	ABAYE2090	ABZJ_01752	ABSDF1710
BJ-AB0715_01762	BJ-AB0868_01827	BJ-AB07104_02155	AB57_1785	ABK1_2047	ABBFA_001935	ABTW07_1805	ABTJ_02120	ACICU_01588	ACIAD1930	A1S_1542	ABAYE2092	ABZJ_01750	ABSDF1708
BJ-AB0715_01759	BJ-AB0868_01821	BJ-AB07104_02158	AB57_1782	ABK1_2044	ABBFA_001938	ABTW07_1802	ABTJ_02123	ACICU_01585	ACIAD1865	A1S_1539	ABAYE2096	ABZJ_01747	ABSDF2097
BJ-AB0715_01757	BJ-AB0868_01819	BJ-AB07104_02160	AB57_1780	ABK1_2042	ABBFA_001940	ABTW07_1800	ABTJ_02125	ACICU_01583	ACIAD1867	A1S_1537	ABAYE2098	ABZJ_01745	ABSDF2099
BJ-AB0715_01754	BJ-AB0868_01816	BJ-AB07104_02163	AB57_1776	ABK1_2039	ABBFA_001943	ABTW07_1797	ABTJ_02128	ACICU_01580	ACIAD1874	A1S_1534	ABAYE2101	ABZJ_01742	ABSDF2102
BJ-AB0715_01751	BJ-AB0868_01813	BJ-AB07104_02166	AB57_1773	ABK1_2036	ABBFA_001946	ABTW07_1794	ABTJ_02131	ACICU_01577	ACIAD1650	A1S_1531	ABAYE2104	ABZJ_01739	ABSDF2105
BJ-AB0715_01750	BJ-AB0868_01812	BJ-AB07104_02167	AB57_1772	ABK1_2035	ABBFA_001947	ABTW07_1793	ABTJ_02132	ACICU_01576	ACIAD1649	A1S_1530	ABAYE2105	ABZJ_01738	ABSDF2107
BJ-AB0715_01748	BJ-AB0868_01809	BJ-AB07104_02169	AB57_1770	ABK1_2033	ABBFA_001949	ABTW07_1791	ABTJ_02134	ACICU_01574	ACIAD1646	A1S_1528	ABAYE2108	ABZJ_01736	ABSDF2109
BJ-AB0715_01746	BJ-AB0868_01807	BJ-AB07104_02171	AB57_1768	ABK1_2031	ABBFA_001951	ABTW07_1789	ABTJ_02136	ACICU_01572	ACIAD1645	A1S_1527	ABAYE2110	ABZJ_01734	ABSDF2113
BJ-AB0715_01745	BJ-AB0868_01806	BJ-AB07104_02172	AB57_1767	ABK1_2030	ABBFA_001952	ABTW07_1788	ABTJ_02137	ACICU_01571	ACIAD1644	A1S_1526	ABAYE2111	ABZJ_01733	ABSDF2114
BJ-AB0715_01743	BJ-AB0868_01804	BJ-AB07104_02174	AB57_1765	ABK1_2028	ABBFA_001954	ABTW07_1786	ABTJ_02139	ACICU_01569	ACIAD1919	A1S_1524	ABAYE2113	ABZJ_01731	ABSDF2116
BJ-AB0715_01742	BJ-AB0868_01803	BJ-AB07104_02175	AB57_1764	ABK1_2027	ABBFA_001955	ABTW07_1785	ABTJ_02140	ACICU_01568	ACIAD2034	A1S_1523	ABAYE2114	ABZJ_01730	ABSDF2117
BJ-AB0715_01728	BJ-AB0868_01789	BJ-AB07104_02188	AB57_1751	ABK1_2012	ABBFA_001968	ABTW07_1744	ABTJ_02152	ACICU_01555	ACIAD2043	A1S_1512	ABAYE2128	ABZJ_01718	ABSDF2132
BJ-AB0715_01727	BJ-AB0868_01788	BJ-AB07104_02189	AB57_1750	ABK1_2011	ABBFA_001969	ABTW07_1743	ABTJ_02153	ACICU_01554	ACIAD2045	A1S_1511	ABAYE2129	ABZJ_01716	ABSDF2133
BJ-AB0715_01702	BJ-AB0868_01762	BJ-AB07104_02218	AB57_1724	ABK1_1984	ABBFA_001996	ABTW07_1690	ABTJ_02180	ACICU_01529	ACIAD2062	A1S_1489	ABAYE2163	ABZJ_01690	ABSDF2156
BJ-AB0715_01701	BJ-AB0868_01761	BJ-AB07104_02220	AB57_1723	ABK1_1983	ABBFA_001997	ABTW07_1689	ABTJ_02181	ACICU_01528	ACIAD2064	A1S_1488	ABAYE2164	ABZJ_01689	ABSDF2157
BJ-AB0715_01697	BJ-AB0868_01757	BJ-AB07104_02223	AB57_1718	ABK1_1980	ABBFA_002000	ABTW07_1686	ABTJ_02184	ACICU_01525	ACIAD2068	A1S_1485	ABAYE2167	ABZJ_01686	ABSDF2160
BJ-AB0715_01693	BJ-AB0868_01753	BJ-AB07104_02227	AB57_1714	ABK1_1976	ABBFA_002004	ABTW07_1682	ABTJ_02188	ACICU_01521	ACIAD2071	A1S_1481	ABAYE2171	ABZJ_01682	ABSDF2164
BJ-AB0715_01689	BJ-AB0868_01749	BJ-AB07104_02231	AB57_1710	ABK1_1972	ABBFA_002008	ABTW07_1678	ABTJ_02192	ACICU_01517	ACIAD2075	A1S_1478	ABAYE2175	ABZJ_01678	ABSDF2169
BJ-AB0715_01685	BJ-AB0868_01745	BJ-AB07104_02235	AB57_1706	ABK1_1968	ABBFA_002012	ABTW07_1674	ABTJ_02196	ACICU_01513	ACIAD2078	A1S_1475	ABAYE2179	ABZJ_01674	ABSDF2173
BJ-AB0715_01684	BJ-AB0868_01744	BJ-AB07104_02236	AB57_1705	ABK1_1967	ABBFA_002013	ABTW07_1673	ABTJ_02197	ACICU_01512	ACIAD2079	A1S_1474	ABAYE2180	ABZJ_01673	ABSDF2174
BJ-AB0715_01683	BJ-AB0868_01743	BJ-AB07104_02237	AB57_1704	ABK1_1966	ABBFA_002014	ABTW07_1672	ABTJ_02198	ACICU_01511	ACIAD2080	A1S_1473	ABAYE2181	ABZJ_01672	ABSDF2175
BJ-AB0715_01680	BJ-AB0868_01740	BJ-AB07104_02240	AB57_1701	ABK1_1963	ABBFA_002017	ABTW07_1669	ABTJ_02201	ACICU_01508	ACIAD2085	A1S_1470	ABAYE2184	ABZJ_01669	ABSDF2179
BJ-AB0715_01679	BJ-AB0868_01739	BJ-AB07104_02241	AB57_1700	ABK1_1962	ABBFA_002018	ABTW07_1668	ABTJ_02202	ACICU_01507	ACIAD2086	A1S_1469	ABAYE2185	ABZJ_01668	ABSDF2180
BJ-AB0715_01678	BJ-AB0868_01738	BJ-AB07104_02242	AB57_1699	ABK1_1961	ABBFA_002019	ABTW07_1667	ABTJ_02203	ACICU_01506	ACIAD2087	A1S_1468	ABAYE2186	ABZJ_01667	ABSDF2181
BJ-AB0715_01676	BJ-AB0868_01736	BJ-AB07104_02244	AB57_1697	ABK1_1959	ABBFA_002021	ABTW07_1665	ABTJ_02205	ACICU_01504	ACIAD2088	A1S_1466	ABAYE2188	ABZJ_01665	ABSDF2183
BJ-AB0715_01675	BJ-AB0868_01735	BJ-AB07104_02245	AB57_1696	ABK1_1958	ABBFA_002022	ABTW07_1664	ABTJ_02206	ACICU_01503	ACIAD2089	A1S_1465	ABAYE2189	ABZJ_01664	ABSDF1559
BJ-AB0715_01674	BJ-AB0868_01734	BJ-AB07104_02246	AB57_1695	ABK1_1957	ABBFA_002023	ABTW07_1663	ABTJ_02207	ACICU_01502	ACIAD2090	A1S_1464	ABAYE2190	ABZJ_01663	ABSDF1558
BJ-AB0715_01671	BJ-AB0868_01731	BJ-AB07104_02249	AB57_1692	ABK1_1954	ABBFA_002026	ABTW07_1660	ABTJ_02210	ACICU_01499	ACIAD2094	A1S_1461	ABAYE2193	ABZJ_01660	ABSDF1555
BJ-AB0715_02287	BJ-AB0868_02386	BJ-AB07104_02388	AB57_2369	ABK1_1494	ABBFA_001428	ABTW07_2439	ABTJ_01502	ACICU_02240	ACIAD1943	A1S_2047	ABAYE1528	ABZJ_02392	ABSDF2199
BJ-AB0715_02289	BJ-AB0868_02388	BJ-AB07104_02390	AB57_2371	ABK1_1492	ABBFA_001426	ABTW07_2441	ABTJ_01500	ACICU_02242	ACIAD1945	A1S_2050	ABAYE1526	ABZJ_02394	ABSDF2201
BJ-AB0715_02292	BJ-AB0868_02391	BJ-AB07104_02393	AB57_2374	ABK1_1489	ABBFA_001423	ABTW07_2444	ABTJ_01497	ACICU_02245	ACIAD1950	A1S_2053	ABAYE1522	ABZJ_02397	ABSDF2205
BJ-AB0715_02295	BJ-AB0868_02394	BJ-AB07104_02396	AB57_2377	ABK1_1485	ABBFA_001420	ABTW07_2448	ABTJ_01493	ACICU_02248	ACIAD1970	A1S_2056	ABAYE1519	ABZJ_02401	ABSDF2208
BJ-AB0715_02298	BJ-AB0868_02395	BJ-AB07104_02397	AB57_2378	ABK1_1484	ABBFA_001419	ABTW07_2449	ABTJ_01492	ACICU_02249	ACIAD1971	A1S_2057	ABAYE1518	ABZJ_02402	ABSDF2209
BJ-AB0715_02299	BJ-AB0868_02396	BJ-AB07104_02398	AB57_2379	ABK1_1483	ABBFA_001418	ABTW07_2450	ABTJ_01491	ACICU_02250	ACIAD1973	A1S_2058	ABAYE1517	ABZJ_02403	ABSDF2210
BJ-AB0715_02300	BJ-AB0868_02397	BJ-AB07104_02399	AB57_2380	ABK1_1482	ABBFA_001417	ABTW07_2451	ABTJ_01490	ACICU_02251	ACIAD1974	A1S_2059	ABAYE1516	ABZJ_02404	ABSDF2211
BJ-AB0715_02302	BJ-AB0868_02399	BJ-AB07104_02401	AB57_2382	ABK1_1480	ABBFA_001415	ABTW07_2453	ABTJ_01488	ACICU_02253	ACIAD1976	A1S_2061	ABAYE1514	ABZJ_02406	ABSDF2213
BJ-AB0715_02303	BJ-AB0868_02400	BJ-AB07104_02402	AB57_2383	ABK1_1479	ABBFA_001414	ABTW07_2454	ABTJ_01487	ACICU_02254	ACIAD1977	A1S_2062	ABAYE1513	ABZJ_02407	ABSDF2214
BJ-AB0715_02305	BJ-AB0868_02402	BJ-AB07104_02404	AB57_2385	ABK1_1477	ABBFA_001413	ABTW07_2456	ABTJ_01485	ACICU_02256	ACIAD1979	A1S_2064	ABAYE1511	ABZJ_02408	ABSDF2216
BJ-AB0715_02306	BJ-AB0868_02403	BJ-AB07104_02405	AB57_2386	ABK1_1476	ABBFA_001412	ABTW07_2457	ABTJ_01484	ACICU_02257	ACIAD1980	A1S_2065	ABAYE1510	ABZJ_02410	ABSDF2217
BJ-AB0715_02307	BJ-AB0868_02404	BJ-AB07104_02406	AB57_2387	ABK1_1475	ABBFA_001411	ABTW07_2458	ABTJ_01483	ACICU_02258	ACIAD1981	A1S_2066	ABAYE1509	ABZJ_02411	ABSDF2218
BJ-AB0715_02310	BJ-AB0868_02407	BJ-AB07104_02409	AB57_2390	ABK1_1472	ABBFA_001408	ABTW07_2461	ABTJ_01480	ACICU_02261	ACIAD1983	A1S_2069	ABAYE1506	ABZJ_02414	ABSDF2221
BJ-AB0715_02311	BJ-AB0868_02408	BJ-AB07104_02410	AB57_2391	ABK1_1471	ABBFA_001407	ABTW07_2462	ABTJ_01479	ACICU_02262	ACIAD1984	A1S_2070	ABAYE1505	ABZJ_02415	ABSDF2222
BJ-AB0715_02379	BJ-AB0868_02426	BJ-AB07104_02428	AB57_2407	ABK1_1456	ABBFA_001391	ABTW07_2476	ABTJ_01461	ACICU_02278	ACIAD1869	A1S_2079	ABAYE1487	ABZJ_02433	ABSDF1652
BJ-AB0715_02392	BJ-AB0868_02436	BJ-AB07104_02438	AB57_2424	ABK1_1446	ABBFA_001374	ABTW07_2485	ABTJ_01452	ACICU_02288	ACIAD2008	A1S_2092	ABAYE1469	ABZJ_02443	ABSDF1648
BJ-AB0715_02393	BJ-AB0868_02437	BJ-AB07104_02439	AB57_2425	ABK1_1445	ABBFA_001373	ABTW07_2486	ABTJ_01451	ACICU_02289	ACIAD2009	A1S_2093	ABAYE1468	ABZJ_02444	ABSDF1646
BJ-AB0715_02394	BJ-AB0868_02438	BJ-AB07104_02440	AB57_2426	ABK1_1444	ABBFA_001372	ABTW07_2487	ABTJ_01450	ACICU_02290	ACIAD2010	A1S_2094	ABAYE1467	ABZJ_02445	ABSDF1645
BJ-AB0715_02395	BJ-AB0868_02439	BJ-AB07104_02441	AB57_2427	ABK1_1443	ABBFA_001371	ABTW07_2488	ABTJ_01449	ACICU_02291	ACIAD2011	A1S_2095	ABAYE1466	ABZJ_02446	ABSDF1644
BJ-AB0715_02397	BJ-AB0868_02442	BJ-AB07104_02444	AB57_2429	ABK1_1440	ABBFA_001369	ABTW07_2491	ABTJ_01446	ACICU_02294	ACIAD2014	A1S_2097	ABAYE1464	ABZJ_02449	ABSDF1642
BJ-AB0715_02398	BJ-AB0868_02443	BJ-AB07104_02445	AB57_2430	ABK1_1439	ABBFA_001368	ABTW07_2492	ABTJ_01445	ACICU_02295	ACIAD2015	A1S_2098	ABAYE1463	ABZJ_02450	ABSDF1641
BJ-AB0715_02401	BJ-AB0868_02446	BJ-AB07104_02448	AB57_2434	ABK1_1436	ABBFA_001365	ABTW07_2495	ABTJ_01442	ACICU_02298	ACIAD2018	A1S_2102	ABAYE1460	ABZJ_02453	ABSDF1638
BJ-AB0715_02402	BJ-AB0868_02447	BJ-AB07104_02449	AB57_2435	ABK1_1435	ABBFA_001364	ABTW07_2496	ABTJ_01441	ACICU_02299	ACIAD1458	A1S_2103	ABAYE1459	ABZJ_02454	ABSDF1637
BJ-AB0715_02405	BJ-AB0868_02450	BJ-AB07104_02452	AB57_2438	ABK1_1432	ABBFA_001361	ABTW07_2499	ABTJ_01438	ACICU_02302	ACIAD2019	A1S_2107	ABAYE1456	ABZJ_02457	ABSDF1633
BJ-AB0715_02406	BJ-AB0868_02451	BJ-AB07104_02453	AB57_2440	ABK1_1431	ABBFA_001359	ABTW07_2500	ABTJ_01437	ACICU_02304	ACIAD1920	A1S_2108	ABAYE1455	ABZJ_02459	ABSDF1631
BJ-AB0715_02413	BJ-AB0868_02458	BJ-AB07104_02460	AB57_2447	ABK1_1425	ABBFA_001352	ABTW07_2506	ABTJ_01429	ACICU_02311	ACIAD2374	A1S_2113	ABAYE1448	ABZJ_02466	ABSDF1624
BJ-AB0715_02415	BJ-AB0868_02460	BJ-AB07104_02462	AB57_2449	ABK1_1423	ABBFA_001350	ABTW07_2508	ABTJ_01427	ACICU_02313	ACIAD2376	A1S_2116	ABAYE1446	ABZJ_02468	ABSDF1622
BJ-AB0715_02416	BJ-AB0868_02461	BJ-AB07104_02463	AB57_2450	ABK1_1422	ABBFA_001349	ABTW07_2509	ABTJ_01426	ACICU_02314	ACIAD2377	A1S_2117	ABAYE1445	ABZJ_02469	ABSDF1621
BJ-AB0715_02421	BJ-AB0868_02467	BJ-AB07104_02468	AB57_2455	ABK1_1417	ABBFA_001344	ABTW07_2514	ABTJ_01421	ACICU_02320	ACIAD2383	A1S_2121	ABAYE1440	ABZJ_02474	ABSDF1616
BJ-AB0715_02505	BJ-AB0868_02477	BJ-AB07104_02478	AB57_2465	ABK1_1407	ABBFA_001334	ABTW07_2524	ABTJ_01411	ACICU_02332	ACIAD2403	A1S_2132	ABAYE1429	ABZJ_02484	ABSDF1607
BJ-AB0715_02508	BJ-AB0868_02480	BJ-AB07104_02481	AB57_2468	ABK1_1404	ABBFA_001331	ABTW07_2527	ABTJ_01408	ACICU_02335	ACIAD2406	A1S_2135	ABAYE1426	ABZJ_02487	ABSDF1604
BJ-AB0715_02515	BJ-AB0868_02485	BJ-AB07104_02486	AB57_2473	ABK1_1349	ABBFA_001326	ABTW07_2532	ABTJ_01403	ACICU_02340	ACIAD2977	A1S_2140	ABAYE1421	ABZJ_02492	ABSDF1598
BJ-AB0715_02519	BJ-AB0868_02489	BJ-AB07104_02491	AB57_2477	ABK1_1345	ABBFA_001322	ABTW07_2536	ABTJ_01399	ACICU_02344	ACIAD2409	A1S_2145	ABAYE1416	ABZJ_02496	ABSDF1594
BJ-AB0715_02520	BJ-AB0868_02490	BJ-AB07104_02492	AB57_2478	ABK1_1344	ABBFA_001321	ABTW07_2537	ABTJ_01398	ACICU_02345	ACIAD2411	A1S_2146	ABAYE1415	ABZJ_02497	ABSDF1593
BJ-AB0715_02522	BJ-AB0868_02492	BJ-AB07104_02494	AB57_2480	ABK1_1342	ABBFA_001319	ABTW07_2539	ABTJ_01396	ACICU_02347	ACIAD1611	A1S_2148	ABAYE1413	ABZJ_02499	ABSDF1591
BJ-AB0715_02524	BJ-AB0868_02494	BJ-AB07104_02496	AB57_2482	ABK1_1340	ABBFA_001317	ABTW07_2541	ABTJ_01394	ACICU_02349	ACIAD2416	A1S_2150	ABAYE1411	ABZJ_02501	ABSDF1589
BJ-AB0715_02538	BJ-AB0868_02511	BJ-AB07104_02513	AB57_2500	ABK1_1324	ABBFA_001301	ABTW07_2557	ABTJ_01378	ACICU_02366	ACIAD2422	A1S_2163	ABAYE1392	ABZJ_02517	ABSDF1578
BJ-AB0715_02539	BJ-AB0868_02512	BJ-AB07104_02514	AB57_2501	ABK1_1323	ABBFA_001300	ABTW07_2558	ABTJ_01377	ACICU_02367	ACIAD2423	A1S_2164	ABAYE1391	ABZJ_02518	ABSDF1577
BJ-AB0715_02541	BJ-AB0868_02514	BJ-AB07104_02516	AB57_2503	ABK1_1321	ABBFA_001298	ABTW07_2560	ABTJ_01375	ACICU_02369	ACIAD2425	A1S_2166	ABAYE1389	ABZJ_02520	ABSDF1575
BJ-AB0715_02542	BJ-AB0868_02515	BJ-AB07104_02517	AB57_2505	ABK1_1320	ABBFA_001297	ABTW07_2561	ABTJ_01374	ACICU_02370	ACIAD2426	A1S_2167	ABAYE1388	ABZJ_02521	ABSDF1574
BJ-AB0715_02543	BJ-AB0868_02516	BJ-AB07104_02518	AB57_2506	ABK1_1319	ABBFA_001296	ABTW07_2562	ABTJ_01373	ACICU_02371	ACIAD2427	A1S_2168	ABAYE1387	ABZJ_02522	ABSDF1573
BJ-AB0715_02546	BJ-AB0868_02519	BJ-AB07104_02521	AB57_2509	ABK1_1316	ABBFA_001293	ABTW07_2565	ABTJ_01370	ACICU_02374	ACIAD2430	A1S_2171	ABAYE1384	ABZJ_02525	ABSDF1570
BJ-AB0715_02547	BJ-AB0868_02520	BJ-AB07104_02522	AB57_2510	ABK1_1315	ABBFA_001292	ABTW07_2566	ABTJ_01369	ACICU_02375	ACIAD2431	A1S_2172	ABAYE1383	ABZJ_02526	ABSDF1569
BJ-AB0715_02548	BJ-AB0868_02521	BJ-AB07104_02523	AB57_2511	ABK1_1314	ABBFA_001291	ABTW07_2567	ABTJ_01368	ACICU_02376	ACIAD2432	A1S_2173	ABAYE1382	ABZJ_02527	ABSDF1568
BJ-AB0715_02555	BJ-AB0868_02528	BJ-AB07104_02530	AB57_2518	ABK1_1307	ABBFA_001284	ABTW07_2574	ABTJ_01361	ACICU_02383	ACIAD2439	A1S_2181	ABAYE1375	ABZJ_02534	ABSDF1563
BJ-AB0715_02556	BJ-AB0868_02530	BJ-AB07104_02532	AB57_2520	ABK1_1305	ABBFA_001282	ABTW07_2575	ABTJ_01360	ACICU_02384	ACIAD2440	A1S_2182	ABAYE1373	ABZJ_02536	ABSDF1520
BJ-AB0715_02558	BJ-AB0868_02532	BJ-AB07104_02534	AB57_2522	ABK1_1303	ABBFA_001280	ABTW07_2577	ABTJ_01358	ACICU_02386	ACIAD2443	A1S_2184	ABAYE1371	ABZJ_02538	ABSDF1518
BJ-AB0715_02562	BJ-AB0868_02536	BJ-AB07104_02538	AB57_2526	ABK1_1299	ABBFA_001276	ABTW07_2581	ABTJ_01354	ACICU_02390	ACIAD2448	A1S_2189	ABAYE1366	ABZJ_02542	ABSDF1512
BJ-AB0715_02565	BJ-AB0868_02539	BJ-AB07104_02541	AB57_2529	ABK1_1296	ABBFA_001273	ABTW07_2584	ABTJ_01351	ACICU_02393	ACIAD2451	A1S_2193	ABAYE1363	ABZJ_02545	ABSDF1509
BJ-AB0715_02611	BJ-AB0868_02570	BJ-AB07104_02593	AB57_2580	ABK1_1263	ABBFA_001222	ABTW07_2617	ABTJ_01298	ACICU_02425	ACIAD0804	A1S_2221	ABAYE1309	ABZJ_02553	ABSDF1304
BJ-AB0715_02628	BJ-AB0868_02587	BJ-AB07104_02610	AB57_2597	ABK1_1245	ABBFA_001199	ABTW07_2634	ABTJ_01276	ACICU_02442	ACIAD1335	A1S_2241	ABAYE1291	ABZJ_02570	ABSDF1287
BJ-AB0715_02629	BJ-AB0868_02588	BJ-AB07104_02611	AB57_2598	ABK1_1244	ABBFA_001198	ABTW07_2635	ABTJ_01275	ACICU_02443	ACIAD1334	A1S_2242	ABAYE1290	ABZJ_02571	ABSDF1286
BJ-AB0715_02631	BJ-AB0868_02590	BJ-AB07104_02613	AB57_2600	ABK1_1242	ABBFA_001196	ABTW07_2637	ABTJ_01273	ACICU_02445	ACIAD1332	A1S_2244	ABAYE1288	ABZJ_02573	ABSDF1284
BJ-AB0715_02632	BJ-AB0868_02591	BJ-AB07104_02614	AB57_2601	ABK1_1241	ABBFA_001195	ABTW07_2638	ABTJ_01272	ACICU_02446	ACIAD1331	A1S_2245	ABAYE1286	ABZJ_02574	ABSDF1283
BJ-AB0715_02633	BJ-AB0868_02592	BJ-AB07104_02615	AB57_2602	ABK1_1240	ABBFA_001194	ABTW07_2639	ABTJ_01271	ACICU_02447	ACIAD1330	A1S_2246	ABAYE1285	ABZJ_02575	ABSDF1282
BJ-AB0715_02634	BJ-AB0868_02593	BJ-AB07104_02616	AB57_2603	ABK1_1239	ABBFA_001193	ABTW07_2640	ABTJ_01270	ACICU_02448	ACIAD1328	A1S_2247	ABAYE1284	ABZJ_02576	ABSDF1281
BJ-AB0715_02635	BJ-AB0868_02594	BJ-AB07104_02617	AB57_2604	ABK1_1238	ABBFA_001192	ABTW07_2641	ABTJ_01269	ACICU_02449	ACIAD1327	A1S_2248	ABAYE1283	ABZJ_02577	ABSDF1280
BJ-AB0715_02637	BJ-AB0868_02596	BJ-AB07104_02619	AB57_2606	ABK1_1236	ABBFA_001190	ABTW07_2643	ABTJ_01267	ACICU_02451	ACIAD1324	A1S_2250	ABAYE1281	ABZJ_02579	ABSDF1278
BJ-AB0715_02638	BJ-AB0868_02597	BJ-AB07104_02620	AB57_2607	ABK1_1235	ABBFA_001189	ABTW07_2644	ABTJ_01266	ACICU_02452	ACIAD1323	A1S_2251	ABAYE1280	ABZJ_02580	ABSDF1277
BJ-AB0715_02639	BJ-AB0868_02598	BJ-AB07104_02621	AB57_2608	ABK1_1234	ABBFA_001188	ABTW07_2645	ABTJ_01265	ACICU_02453	ACIAD1322	A1S_2252	ABAYE1279	ABZJ_02581	ABSDF1276
BJ-AB0715_02640	BJ-AB0868_02599	BJ-AB07104_02622	AB57_2609	ABK1_1233	ABBFA_001187	ABTW07_2646	ABTJ_01264	ACICU_02454	ACIAD1321	A1S_2253	ABAYE1278	ABZJ_02582	ABSDF1275
BJ-AB0715_02644	BJ-AB0868_02603	BJ-AB07104_02626	AB57_2614	ABK1_1229	ABBFA_001183	ABTW07_2650	ABTJ_01260	ACICU_02458	ACIAD1317	A1S_2257	ABAYE1223	ABZJ_02650	ABSDF1271
BJ-AB0715_02646	BJ-AB0868_02605	BJ-AB07104_02628	AB57_2616	ABK1_1227	ABBFA_001181	ABTW07_2652	ABTJ_01258	ACICU_02460	ACIAD1315	A1S_2259	ABAYE1221	ABZJ_02652	ABSDF1269
BJ-AB0715_02647	BJ-AB0868_02606	BJ-AB07104_02629	AB57_2617	ABK1_1226	ABBFA_001180	ABTW07_2653	ABTJ_01257	ACICU_02461	ACIAD1314	A1S_2260	ABAYE1220	ABZJ_02653	ABSDF1268
BJ-AB0715_02648	BJ-AB0868_02607	BJ-AB07104_02630	AB57_2618	ABK1_1225	ABBFA_001179	ABTW07_2654	ABTJ_01256	ACICU_02462	ACIAD1313	A1S_2261	ABAYE1219	ABZJ_02654	ABSDF1267
BJ-AB0715_02650	BJ-AB0868_02609	BJ-AB07104_02632	AB57_2620	ABK1_1223	ABBFA_001177	ABTW07_2656	ABTJ_01254	ACICU_02464	ACIAD1311	A1S_2262	ABAYE1217	ABZJ_02656	ABSDF1264
BJ-AB0715_02651	BJ-AB0868_02610	BJ-AB07104_02633	AB57_2621	ABK1_1222	ABBFA_001176	ABTW07_2657	ABTJ_01253	ACICU_02465	ACIAD1310	A1S_2263	ABAYE1216	ABZJ_02657	ABSDF1263
BJ-AB0715_02652	BJ-AB0868_02611	BJ-AB07104_02634	AB57_2622	ABK1_1221	ABBFA_001175	ABTW07_2658	ABTJ_01252	ACICU_02466	ACIAD1309	A1S_2264	ABAYE1215	ABZJ_02658	ABSDF1262
BJ-AB0715_02656	BJ-AB0868_02615	BJ-AB07104_02638	AB57_2626	ABK1_1217	ABBFA_001172	ABTW07_2662	ABTJ_01248	ACICU_02470	ACIAD2219	A1S_2268	ABAYE1211	ABZJ_02662	ABSDF1258
BJ-AB0715_02663	BJ-AB0868_02617	BJ-AB07104_02640	AB57_2628	ABK1_1215	ABBFA_001170	ABTW07_2664	ABTJ_01246	ACICU_02472	ACIAD2220	A1S_2274	ABAYE1209	ABZJ_02664	ABSDF1254
BJ-AB0715_02664	BJ-AB0868_02618	BJ-AB07104_02641	AB57_2629	ABK1_1214	ABBFA_001169	ABTW07_2665	ABTJ_01245	ACICU_02473	ACIAD2221	A1S_2275	ABAYE1208	ABZJ_02665	ABSDF1253
BJ-AB0715_02665	BJ-AB0868_02619	BJ-AB07104_02642	AB57_2630	ABK1_1213	ABBFA_001168	ABTW07_2666	ABTJ_01244	ACICU_02474	ACIAD2222	A1S_2276	ABAYE1207	ABZJ_02666	ABSDF1252
BJ-AB0715_02666	BJ-AB0868_02620	BJ-AB07104_02643	AB57_2631	ABK1_1212	ABBFA_001167	ABTW07_2667	ABTJ_01243	ACICU_02475	ACIAD2223	A1S_2277	ABAYE1206	ABZJ_02667	ABSDF1251
BJ-AB0715_02668	BJ-AB0868_02622	BJ-AB07104_02645	AB57_2633	ABK1_1210	ABBFA_001165	ABTW07_2669	ABTJ_01241	ACICU_02477	ACIAD2226	A1S_2279	ABAYE1204	ABZJ_02669	ABSDF1249
BJ-AB0715_02670	BJ-AB0868_02624	BJ-AB07104_02647	AB57_2635	ABK1_1208	ABBFA_001163	ABTW07_2671	ABTJ_01239	ACICU_02479	ACIAD2229	A1S_2281	ABAYE1201	ABZJ_02671	ABSDF1245
BJ-AB0715_02671	BJ-AB0868_02625	BJ-AB07104_02648	AB57_2636	ABK1_1207	ABBFA_001162	ABTW07_2672	ABTJ_01238	ACICU_02480	ACIAD2230	A1S_2282	ABAYE1200	ABZJ_02672	ABSDF1244
BJ-AB0715_02672	BJ-AB0868_02626	BJ-AB07104_02649	AB57_2637	ABK1_1206	ABBFA_001161	ABTW07_2673	ABTJ_01237	ACICU_02481	ACIAD2231	A1S_2283	ABAYE1199	ABZJ_02673	ABSDF1243
BJ-AB0715_02674	BJ-AB0868_02628	BJ-AB07104_02651	AB57_2640	ABK1_1204	ABBFA_001159	ABTW07_2675	ABTJ_01235	ACICU_02483	ACIAD2235	A1S_2285	ABAYE1197	ABZJ_02675	ABSDF1241
BJ-AB0715_02675	BJ-AB0868_02629	BJ-AB07104_02652	AB57_2641	ABK1_1203	ABBFA_001158	ABTW07_2676	ABTJ_01234	ACICU_02484	ACIAD2236	A1S_2286	ABAYE1196	ABZJ_02676	ABSDF1240
BJ-AB0715_02682	BJ-AB0868_02634	BJ-AB07104_02657	AB57_2646	ABK1_1198	ABBFA_001153	ABTW07_2681	ABTJ_01229	ACICU_02489	ACIAD2241	A1S_2290	ABAYE1191	ABZJ_02681	ABSDF1234
BJ-AB0715_02685	BJ-AB0868_02637	BJ-AB07104_02660	AB57_2649	ABK1_1195	ABBFA_001150	ABTW07_2684	ABTJ_01226	ACICU_02492	ACIAD2244	A1S_2293	ABAYE1186	ABZJ_02684	ABSDF1229
BJ-AB0715_02699	BJ-AB0868_02652	BJ-AB07104_02675	AB57_2665	ABK1_1181	ABBFA_001136	ABTW07_2698	ABTJ_01211	ACICU_02507	ACIAD2255	A1S_2307	ABAYE1171	ABZJ_02699	ABSDF1459
BJ-AB0715_02702	BJ-AB0868_02654	BJ-AB07104_02677	AB57_2667	ABK1_1179	ABBFA_001134	ABTW07_2700	ABTJ_01209	ACICU_02509	ACIAD2256	A1S_2308	ABAYE1169	ABZJ_02701	ABSDF1458
BJ-AB0715_02705	BJ-AB0868_02657	BJ-AB07104_02680	AB57_2744	ABK1_1176	ABBFA_001130	ABTW07_2703	ABTJ_01205	ACICU_02512	ACIAD2259	A1S_2311	ABAYE1166	ABZJ_02704	ABSDF1215
BJ-AB0715_02706	BJ-AB0868_02658	BJ-AB07104_02681	AB57_2745	ABK1_1175	ABBFA_001129	ABTW07_2704	ABTJ_01204	ACICU_02513	ACIAD2260	A1S_2312	ABAYE1165	ABZJ_02705	ABSDF1214
BJ-AB0715_02707	BJ-AB0868_02659	BJ-AB07104_02682	AB57_2746	ABK1_1174	ABBFA_001128	ABTW07_2705	ABTJ_01203	ACICU_02514	ACIAD2261	A1S_2313	ABAYE1164	ABZJ_02706	ABSDF1213
BJ-AB0715_02708	BJ-AB0868_02660	BJ-AB07104_02683	AB57_2747	ABK1_1173	ABBFA_001127	ABTW07_2706	ABTJ_01202	ACICU_02515	ACIAD2262	A1S_2314	ABAYE1163	ABZJ_02707	ABSDF1212
BJ-AB0715_02709	BJ-AB0868_02661	BJ-AB07104_02684	AB57_2748	ABK1_1172	ABBFA_001126	ABTW07_2707	ABTJ_01201	ACICU_02516	ACIAD2263	A1S_2315	ABAYE1162	ABZJ_02708	ABSDF1211
BJ-AB0715_02710	BJ-AB0868_02662	BJ-AB07104_02685	AB57_2749	ABK1_1171	ABBFA_001125	ABTW07_2708	ABTJ_01200	ACICU_02517	ACIAD2264	A1S_2316	ABAYE1161	ABZJ_02709	ABSDF1210
BJ-AB0715_02711	BJ-AB0868_02663	BJ-AB07104_02686	AB57_2750	ABK1_1170	ABBFA_001124	ABTW07_2709	ABTJ_01199	ACICU_02518	ACIAD2265	A1S_2317	ABAYE1160	ABZJ_02710	ABSDF1209
BJ-AB0715_02716	BJ-AB0868_02668	BJ-AB07104_02691	AB57_2754	ABK1_1165	ABBFA_001120	ABTW07_2713	ABTJ_01194	ACICU_02523	ACIAD2267	A1S_2321	ABAYE1155	ABZJ_02716	ABSDF1204
BJ-AB0715_02717	BJ-AB0868_02669	BJ-AB07104_02692	AB57_2755	ABK1_1164	ABBFA_001119	ABTW07_2714	ABTJ_01193	ACICU_02524	ACIAD2268	A1S_2322	ABAYE1154	ABZJ_02717	ABSDF1203
BJ-AB0715_02719	BJ-AB0868_02671	BJ-AB07104_02694	AB57_2757	ABK1_1162	ABBFA_001117	ABTW07_2716	ABTJ_01191	ACICU_02526	ACIAD2271	A1S_2324	ABAYE1152	ABZJ_02719	ABSDF1201
BJ-AB0715_02720	BJ-AB0868_02672	BJ-AB07104_02695	AB57_2758	ABK1_1161	ABBFA_001116	ABTW07_2717	ABTJ_01190	ACICU_02527	ACIAD2272	A1S_2325	ABAYE1151	ABZJ_02720	ABSDF1200
BJ-AB0715_02725	BJ-AB0868_02676	BJ-AB07104_02699	AB57_2762	ABK1_1158	ABBFA_001112	ABTW07_2720	ABTJ_01186	ACICU_02531	ACIAD2274	A1S_2328	ABAYE1147	ABZJ_02724	ABSDF1195
BJ-AB0715_02726	BJ-AB0868_02677	BJ-AB07104_02700	AB57_2763	ABK1_1157	ABBFA_001111	ABTW07_2721	ABTJ_01185	ACICU_02532	ACIAD2275	A1S_2329	ABAYE1146	ABZJ_02725	ABSDF1194
BJ-AB0715_02728	BJ-AB0868_02679	BJ-AB07104_02702	AB57_2765	ABK1_1155	ABBFA_001109	ABTW07_2723	ABTJ_01183	ACICU_02534	ACIAD2278	A1S_2332	ABAYE1144	ABZJ_02727	ABSDF1189
BJ-AB0715_02729	BJ-AB0868_02680	BJ-AB07104_02703	AB57_2766	ABK1_1154	ABBFA_001108	ABTW07_2724	ABTJ_01182	ACICU_02535	ACIAD2281	A1S_2333	ABAYE1143	ABZJ_02728	ABSDF1188
BJ-AB0715_02730	BJ-AB0868_02681	BJ-AB07104_02704	AB57_2767	ABK1_1153	ABBFA_001107	ABTW07_2725	ABTJ_01181	ACICU_02536	ACIAD2282	A1S_2334	ABAYE1142	ABZJ_02729	ABSDF1187
BJ-AB0715_02736	BJ-AB0868_02685	BJ-AB07104_02708	AB57_2773	ABK1_1584	ABBFA_001103	ABTW07_2729	ABTJ_01177	ACICU_02540	ACIAD2287	A1S_2338	ABAYE1138	ABZJ_02733	ABSDF1183
BJ-AB0715_02737	BJ-AB0868_02686	BJ-AB07104_02709	AB57_2774	ABK1_1583	ABBFA_001102	ABTW07_2730	ABTJ_01176	ACICU_02541	ACIAD2288	A1S_2339	ABAYE1137	ABZJ_02734	ABSDF1182
BJ-AB0715_02740	BJ-AB0868_02689	BJ-AB07104_02712	AB57_2777	ABK1_1580	ABBFA_001099	ABTW07_2733	ABTJ_01173	ACICU_02544	ACIAD1346	A1S_2343	ABAYE1134	ABZJ_02737	ABSDF1179
BJ-AB0715_02744	BJ-AB0868_02693	BJ-AB07104_02716	AB57_2781	ABK1_1576	ABBFA_001092	ABTW07_2737	ABTJ_01166	ACICU_02548	ACIAD2455	A1S_2349	ABAYE1128	ABZJ_02741	ABSDF1174
BJ-AB0715_02745	BJ-AB0868_02694	BJ-AB07104_02717	AB57_2782	ABK1_1575	ABBFA_001091	ABTW07_2738	ABTJ_01165	ACICU_02549	ACIAD2456	A1S_2350	ABAYE1127	ABZJ_02742	ABSDF1173
BJ-AB0715_02753	BJ-AB0868_02701	BJ-AB07104_02724	AB57_2789	ABK1_2672	ABBFA_001084	ABTW07_2806	ABTJ_01158	ACICU_02556	ACIAD2462	A1S_2359	ABAYE1119	ABZJ_02749	ABSDF1163
BJ-AB0715_02756	BJ-AB0868_02704	BJ-AB07104_02727	AB57_2792	ABK1_2675	ABBFA_001080	ABTW07_2809	ABTJ_01155	ACICU_02559	ACIAD2466	A1S_2362	ABAYE1116	ABZJ_02752	ABSDF1160
BJ-AB0715_02758	BJ-AB0868_02706	BJ-AB07104_02729	AB57_2794	ABK1_2677	ABBFA_001078	ABTW07_2811	ABTJ_01153	ACICU_02561	ACIAD2468	A1S_2365	ABAYE1114	ABZJ_02754	ABSDF1158
BJ-AB0715_02763	BJ-AB0868_02713	BJ-AB07104_02832	AB57_2799	ABK1_2685	ABBFA_001073	ABTW07_2816	ABTJ_01146	ACICU_02567	ACIAD2473	A1S_2369	ABAYE1107	ABZJ_02761	ABSDF1151
BJ-AB0715_02764	BJ-AB0868_02714	BJ-AB07104_02833	AB57_2800	ABK1_2686	ABBFA_001072	ABTW07_2817	ABTJ_01145	ACICU_02568	ACIAD2474	A1S_2370	ABAYE1106	ABZJ_02762	ABSDF1150
BJ-AB0715_02765	BJ-AB0868_02715	BJ-AB07104_02834	AB57_2801	ABK1_2687	ABBFA_001071	ABTW07_2818	ABTJ_01144	ACICU_02569	ACIAD2475	A1S_2371	ABAYE1105	ABZJ_02763	ABSDF1149
BJ-AB0715_02798	BJ-AB0868_02773	BJ-AB07104_02893	AB57_2848	ABK1_2750	ABBFA_001035	ABTW07_2874	ABTJ_01086	ACICU_02626	ACIAD2206	A1S_2419	ABAYE1058	ABZJ_02822	ABSDF1143
BJ-AB0715_02799	BJ-AB0868_02774	BJ-AB07104_02894	AB57_2849	ABK1_2751	ABBFA_001034	ABTW07_2875	ABTJ_01085	ACICU_02627	ACIAD2207	A1S_2420	ABAYE1057	ABZJ_02823	ABSDF1142
BJ-AB0715_02802	BJ-AB0868_02777	BJ-AB07104_02897	AB57_2853	ABK1_2754	ABBFA_001031	ABTW07_2878	ABTJ_01082	ACICU_02632	ACIAD2210	A1S_2423	ABAYE1054	ABZJ_02880	ABSDF1137
BJ-AB0715_02804	BJ-AB0868_02779	BJ-AB07104_02899	AB57_2855	ABK1_2756	ABBFA_001029	ABTW07_2880	ABTJ_01080	ACICU_02634	ACIAD2213	A1S_2426	ABAYE1052	ABZJ_02882	ABSDF1135
BJ-AB0715_02805	BJ-AB0868_02780	BJ-AB07104_02900	AB57_2856	ABK1_2757	ABBFA_001028	ABTW07_2881	ABTJ_01079	ACICU_02635	ACIAD2214	A1S_2427	ABAYE1051	ABZJ_02883	ABSDF1134
BJ-AB0715_02808	BJ-AB0868_02782	BJ-AB07104_02902	AB57_2858	ABK1_2759	ABBFA_001026	ABTW07_2883	ABTJ_01077	ACICU_02637	ACIAD1230	A1S_2431	ABAYE1049	ABZJ_02885	ABSDF1132
BJ-AB0715_02809	BJ-AB0868_02783	BJ-AB07104_02903	AB57_2859	ABK1_2760	ABBFA_001025	ABTW07_2884	ABTJ_01076	ACICU_02638	ACIAD1229	A1S_2432	ABAYE1048	ABZJ_02886	ABSDF1131
BJ-AB0715_02813	BJ-AB0868_02787	BJ-AB07104_02907	AB57_2863	ABK1_2764	ABBFA_001021	ABTW07_2888	ABTJ_01072	ACICU_02642	ACIAD1225	A1S_2435	ABAYE1044	ABZJ_02890	ABSDF1127
BJ-AB0715_02814	BJ-AB0868_02788	BJ-AB07104_02908	AB57_2864	ABK1_2765	ABBFA_001020	ABTW07_2889	ABTJ_01071	ACICU_02643	ACIAD1224	A1S_2436	ABAYE1043	ABZJ_02891	ABSDF1126
BJ-AB0715_02817	BJ-AB0868_02791	BJ-AB07104_02911	AB57_2867	ABK1_2768	ABBFA_001017	ABTW07_2892	ABTJ_01068	ACICU_02646	ACIAD1220	A1S_2440	ABAYE1040	ABZJ_02894	ABSDF1123
BJ-AB0715_02818	BJ-AB0868_02792	BJ-AB07104_02912	AB57_2868	ABK1_2769	ABBFA_001016	ABTW07_2893	ABTJ_01067	ACICU_02647	ACIAD1219	A1S_2441	ABAYE1039	ABZJ_02895	ABSDF1122
BJ-AB0715_02822	BJ-AB0868_02796	BJ-AB07104_02916	AB57_2872	ABK1_2773	ABBFA_001012	ABTW07_2897	ABTJ_01063	ACICU_02651	ACIAD1215	A1S_2445	ABAYE1035	ABZJ_02899	ABSDF1103
BJ-AB0715_02823	BJ-AB0868_02797	BJ-AB07104_02917	AB57_2873	ABK1_2774	ABBFA_001011	ABTW07_2898	ABTJ_01062	ACICU_02652	ACIAD1214	A1S_2446	ABAYE1034	ABZJ_02900	ABSDF1102
BJ-AB0715_02824	BJ-AB0868_02798	BJ-AB07104_02918	AB57_2874	ABK1_2775	ABBFA_001010	ABTW07_2899	ABTJ_01061	ACICU_02653	ACIAD1213	A1S_2447	ABAYE1033	ABZJ_02901	ABSDF1101
BJ-AB0715_02825	BJ-AB0868_02799	BJ-AB07104_02919	AB57_2875	ABK1_2776	ABBFA_001009	ABTW07_2900	ABTJ_01060	ACICU_02654	ACIAD1212	A1S_2448	ABAYE1032	ABZJ_02902	ABSDF1100
BJ-AB0715_02830	BJ-AB0868_02804	BJ-AB07104_02924	AB57_2880	ABK1_2782	ABBFA_001004	ABTW07_2905	ABTJ_01055	ACICU_02659	ACIAD1211	A1S_2453	ABAYE1027	ABZJ_02907	ABSDF1093.4
BJ-AB0715_02831	BJ-AB0868_02805	BJ-AB07104_02925	AB57_2881	ABK1_2783	ABBFA_001003	ABTW07_2906	ABTJ_01054	ACICU_02660	ACIAD1210	A1S_2454	ABAYE1026	ABZJ_02908	ABSDF1093.3
BJ-AB0715_02832	BJ-AB0868_02806	BJ-AB07104_02926	AB57_2882	ABK1_2784	ABBFA_001002	ABTW07_2907	ABTJ_01053	ACICU_02661	ACIAD1209	A1S_2455	ABAYE1024	ABZJ_02909	ABSDF1093.2
BJ-AB0715_02837	BJ-AB0868_02811	BJ-AB07104_02933	AB57_2890	ABK1_2789	ABBFA_000997	ABTW07_2912	ABTJ_01048	ACICU_02666	ACIAD1206	A1S_2460	ABAYE1016	ABZJ_02914	ABSDF1087
BJ-AB0715_02839	BJ-AB0868_02813	BJ-AB07104_02935	AB57_2892	ABK1_2791	ABBFA_000995	ABTW07_2914	ABTJ_01046	ACICU_02669	ACIAD1204	A1S_2462	ABAYE1014	ABZJ_02916	ABSDF1083
BJ-AB0715_02840	BJ-AB0868_02814	BJ-AB07104_02936	AB57_2893	ABK1_2792	ABBFA_000994	ABTW07_2915	ABTJ_01045	ACICU_02670	ACIAD1203	A1S_2463	ABAYE1013	ABZJ_02917	ABSDF1082
BJ-AB0715_02842	BJ-AB0868_02816	BJ-AB07104_02938	AB57_2895	ABK1_2794	ABBFA_000992	ABTW07_2917	ABTJ_01043	ACICU_02672	ACIAD1201	A1S_2464	ABAYE1011	ABZJ_02919	ABSDF1079
BJ-AB0715_02843	BJ-AB0868_02817	BJ-AB07104_02939	AB57_2896	ABK1_2795	ABBFA_000991	ABTW07_2918	ABTJ_01042	ACICU_02673	ACIAD1200	A1S_2465	ABAYE1010	ABZJ_02920	ABSDF1078
BJ-AB0715_02847	BJ-AB0868_02821	BJ-AB07104_02943	AB57_2910	ABK1_2799	ABBFA_000977	ABTW07_2922	ABTJ_01038	ACICU_02678	ACIAD1195	A1S_2469	ABAYE0991	ABZJ_02924	ABSDF1072
BJ-AB0715_02850	BJ-AB0868_02823	BJ-AB07104_02945	AB57_2912	ABK1_2801	ABBFA_000974	ABTW07_2924	ABTJ_01036	ACICU_02680	ACIAD1192	A1S_2471	ABAYE0989	ABZJ_02926	ABSDF1070
BJ-AB0715_02851	BJ-AB0868_02824	BJ-AB07104_02946	AB57_2913	ABK1_2802	ABBFA_000973	ABTW07_2925	ABTJ_01035	ACICU_02681	ACIAD1191	A1S_2472	ABAYE0988	ABZJ_02927	ABSDF1069
BJ-AB0715_02859	BJ-AB0868_02830	BJ-AB07104_02952	AB57_2920	ABK1_2808	ABBFA_000967	ABTW07_2930	ABTJ_01029	ACICU_02688	ACIAD1189	A1S_2476	ABAYE0981	ABZJ_02934	ABSDF0996
BJ-AB0715_02860	BJ-AB0868_02831	BJ-AB07104_02953	AB57_2921	ABK1_2809	ABBFA_000966	ABTW07_2931	ABTJ_01028	ACICU_02689	ACIAD1187	A1S_2477	ABAYE0980	ABZJ_02935	ABSDF0995
BJ-AB0715_02861	BJ-AB0868_02832	BJ-AB07104_02954	AB57_2922	ABK1_2810	ABBFA_000965	ABTW07_2932	ABTJ_01027	ACICU_02690	ACIAD1186	A1S_2478	ABAYE0979	ABZJ_02936	ABSDF0994
BJ-AB0715_02862	BJ-AB0868_02833	BJ-AB07104_02955	AB57_2923	ABK1_2811	ABBFA_000964	ABTW07_2933	ABTJ_01026	ACICU_02691	ACIAD1184	A1S_2479	ABAYE0978	ABZJ_02937	ABSDF0993
BJ-AB0715_02864	BJ-AB0868_02835	BJ-AB07104_02957	AB57_2925	ABK1_2813	ABBFA_000962	ABTW07_2935	ABTJ_01024	ACICU_02693	ACIAD1183	A1S_2481	ABAYE0976	ABZJ_02939	ABSDF0989
BJ-AB0715_02889	BJ-AB0868_02845	BJ-AB07104_02966	AB57_2935	ABK1_2822	ABBFA_000954	ABTW07_2944	ABTJ_01015	ACICU_02702	ACIAD1173	A1S_2492	ABAYE0967	ABZJ_02953	ABSDF0985
BJ-AB0715_02890	BJ-AB0868_02846	BJ-AB07104_02967	AB57_2936	ABK1_2823	ABBFA_000953	ABTW07_2945	ABTJ_01014	ACICU_02703	ACIAD2556	A1S_2493	ABAYE0966	ABZJ_02954	ABSDF0984
BJ-AB0715_02891	BJ-AB0868_02847	BJ-AB07104_02968	AB57_2937	ABK1_2824	ABBFA_000952	ABTW07_2946	ABTJ_01013	ACICU_02704	ACIAD2557	A1S_2494	ABAYE0965	ABZJ_02955	ABSDF0983
BJ-AB0715_02892	BJ-AB0868_02848	BJ-AB07104_02969	AB57_2938	ABK1_2825	ABBFA_000951	ABTW07_2947	ABTJ_00942	ACICU_02773	ACIAD2558	A1S_2495	ABAYE0964	ABZJ_02956	ABSDF0982
BJ-AB0715_02894	BJ-AB0868_02850	BJ-AB07104_02971	AB57_2940	ABK1_2827	ABBFA_000949	ABTW07_2949	ABTJ_00940	ACICU_02775	ACIAD2560	A1S_2497	ABAYE0962	ABZJ_02958	ABSDF0980
BJ-AB0715_02896	BJ-AB0868_02852	BJ-AB07104_02973	AB57_2942	ABK1_2829	ABBFA_000947	ABTW07_2951	ABTJ_00938	ACICU_02777	ACIAD2563	A1S_2499	ABAYE0960	ABZJ_02960	ABSDF0976
BJ-AB0715_02898	BJ-AB0868_02854	BJ-AB07104_02975	AB57_2944	ABK1_2833	ABBFA_000945	ABTW07_2953	ABTJ_00936	ACICU_02779	ACIAD2565	A1S_2501	ABAYE0958	ABZJ_02962	ABSDF0974
BJ-AB0715_02901	BJ-AB0868_02857	BJ-AB07104_02978	AB57_2947	ABK1_2836	ABBFA_000942	ABTW07_2956	ABTJ_00933	ACICU_02782	ACIAD2569	A1S_2504	ABAYE0955	ABZJ_02965	ABSDF0970
BJ-AB0715_02902	BJ-AB0868_02858	BJ-AB07104_02979	AB57_2948	ABK1_2837	ABBFA_000941	ABTW07_2957	ABTJ_00932	ACICU_02783	ACIAD2571	A1S_2505	ABAYE0954	ABZJ_02966	ABSDF0969
BJ-AB0715_02904	BJ-AB0868_02860	BJ-AB07104_02981	AB57_2950	ABK1_2839	ABBFA_000939	ABTW07_2959	ABTJ_00930	ACICU_02785	ACIAD2573	A1S_2507	ABAYE0952	ABZJ_02968	ABSDF0967
BJ-AB0715_02914	BJ-AB0868_02868	BJ-AB07104_02989	AB57_2958	ABK1_2847	ABBFA_000929	ABTW07_2967	ABTJ_00921	ACICU_02793	ACIAD2578	A1S_2517	ABAYE0944	ABZJ_02976	ABSDF0955
BJ-AB0715_02916	BJ-AB0868_02870	BJ-AB07104_02991	AB57_2960	ABK1_2849	ABBFA_000927	ABTW07_2969	ABTJ_00919	ACICU_02795	ACIAD2580	A1S_2518	ABAYE0942	ABZJ_02978	ABSDF0953
BJ-AB0715_02918	BJ-AB0868_02872	BJ-AB07104_02993	AB57_2962	ABK1_2851	ABBFA_000925	ABTW07_2971	ABTJ_00917	ACICU_02797	ACIAD2582	A1S_2520	ABAYE0940	ABZJ_02980	ABSDF0951
BJ-AB0715_02920	BJ-AB0868_02874	BJ-AB07104_02995	AB57_2964	ABK1_2853	ABBFA_000923	ABTW07_2973	ABTJ_00915	ACICU_02799	ACIAD2584	A1S_2522	ABAYE0938	ABZJ_02982	ABSDF0949
BJ-AB0715_02921	BJ-AB0868_02875	BJ-AB07104_02996	AB57_2965	ABK1_2854	ABBFA_000922	ABTW07_2974	ABTJ_00914	ACICU_02800	ACIAD2585	A1S_2524	ABAYE0937	ABZJ_02983	ABSDF0948
BJ-AB0715_02923	BJ-AB0868_02877	BJ-AB07104_02998	AB57_2967	ABK1_2856	ABBFA_000919	ABTW07_2976	ABTJ_00912	ACICU_02802	ACIAD2587	A1S_2526	ABAYE0935	ABZJ_02985	ABSDF0945
BJ-AB0715_02926	BJ-AB0868_02880	BJ-AB07104_03001	AB57_2970	ABK1_2859	ABBFA_000916	ABTW07_2979	ABTJ_00909	ACICU_02805	ACIAD2589	A1S_2529	ABAYE0932	ABZJ_02988	ABSDF0942
BJ-AB0715_02929	BJ-AB0868_02883	BJ-AB07104_03004	AB57_2974	ABK1_2862	ABBFA_000913	ABTW07_2982	ABTJ_00906	ACICU_02808	ACIAD2592	A1S_2533	ABAYE0929	ABZJ_02991	ABSDF0939
BJ-AB0715_02931	BJ-AB0868_02885	BJ-AB07104_03006	AB57_2975	ABK1_2863	ABBFA_000912	ABTW07_2983	ABTJ_00905	ACICU_02809	ACIAD2594	A1S_2534	ABAYE0928	ABZJ_02992	ABSDF0938
BJ-AB0715_02932	BJ-AB0868_02886	BJ-AB07104_03007	AB57_2976	ABK1_2864	ABBFA_000911	ABTW07_2984	ABTJ_00904	ACICU_02810	ACIAD2595	A1S_2535	ABAYE0927	ABZJ_02994	ABSDF0937
BJ-AB0715_02935	BJ-AB0868_02889	BJ-AB07104_03010	AB57_2979	ABK1_2867	ABBFA_000908	ABTW07_2987	ABTJ_00901	ACICU_02813	ACIAD2598	A1S_2538	ABAYE0924	ABZJ_02997	ABSDF0934
BJ-AB0715_02936	BJ-AB0868_02890	BJ-AB07104_03011	AB57_2980	ABK1_2868	ABBFA_000907	ABTW07_2988	ABTJ_00900	ACICU_02814	ACIAD2599	A1S_2539	ABAYE0923	ABZJ_02998	ABSDF0933
BJ-AB0715_02938	BJ-AB0868_02892	BJ-AB07104_03013	AB57_2982	ABK1_2870	ABBFA_000905	ABTW07_2990	ABTJ_00898	ACICU_02816	ACIAD2601	A1S_2542	ABAYE0921	ABZJ_03000	ABSDF0931
BJ-AB0715_02939	BJ-AB0868_02893	BJ-AB07104_03014	AB57_2983	ABK1_2871	ABBFA_000904	ABTW07_2991	ABTJ_00897	ACICU_02817	ACIAD2602	A1S_2543	ABAYE0920	ABZJ_03001	ABSDF0930
BJ-AB0715_02941	BJ-AB0868_02895	BJ-AB07104_03016	AB57_2985	ABK1_2873	ABBFA_000902	ABTW07_2993	ABTJ_00895	ACICU_02819	ACIAD2603	A1S_2545	ABAYE0918	ABZJ_03003	ABSDF0926
BJ-AB0715_02943	BJ-AB0868_02897	BJ-AB07104_03018	AB57_2987	ABK1_2875	ABBFA_000900	ABTW07_2995	ABTJ_00893	ACICU_02821	ACIAD2606	A1S_2547	ABAYE0916	ABZJ_03005	ABSDF0924
BJ-AB0715_02945	BJ-AB0868_02899	BJ-AB07104_03020	AB57_2988	ABK1_2877	ABBFA_000898	ABTW07_2997	ABTJ_00891	ACICU_02823	ACIAD2609	A1S_2549	ABAYE0914	ABZJ_03007	ABSDF0921
BJ-AB0715_02948	BJ-AB0868_02903	BJ-AB07104_03024	AB57_2992	ABK1_2880	ABBFA_000895	ABTW07_2999	ABTJ_00888	ACICU_02827	ACIAD2612	A1S_2585	ABAYE0912	ABZJ_03011	ABSDF0918
BJ-AB0715_02949	BJ-AB0868_02904	BJ-AB07104_03025	AB57_2993	ABK1_2881	ABBFA_000894	ABTW07_3000	ABTJ_00887	ACICU_02828	ACIAD2613	A1S_2586	ABAYE0911	ABZJ_03012	ABSDF0917
BJ-AB0715_02950	BJ-AB0868_02905	BJ-AB07104_03026	AB57_2994	ABK1_2882	ABBFA_000893	ABTW07_3001	ABTJ_00886	ACICU_02829	ACIAD2614	A1S_2587	ABAYE0910	ABZJ_03013	ABSDF0916
BJ-AB0715_02951	BJ-AB0868_02906	BJ-AB07104_03027	AB57_2995	ABK1_2883	ABBFA_000892	ABTW07_3002	ABTJ_00885	ACICU_02830	ACIAD2615	A1S_2588	ABAYE0909	ABZJ_03014	ABSDF0915
BJ-AB0715_02953	BJ-AB0868_02908	BJ-AB07104_03029	AB57_2997	ABK1_2885	ABBFA_000890	ABTW07_3004	ABTJ_00883	ACICU_02832	ACIAD2618	A1S_2590	ABAYE0907	ABZJ_03016	ABSDF0912
BJ-AB0715_02954	BJ-AB0868_02909	BJ-AB07104_03030	AB57_2998	ABK1_2886	ABBFA_000889	ABTW07_3005	ABTJ_00882	ACICU_02833	ACIAD2619	A1S_2591	ABAYE0906	ABZJ_03017	ABSDF0911
BJ-AB0715_02955	BJ-AB0868_02910	BJ-AB07104_03031	AB57_2999	ABK1_2887	ABBFA_000888	ABTW07_3006	ABTJ_00881	ACICU_02834	ACIAD2620	A1S_2592	ABAYE0905	ABZJ_03018	ABSDF0910
BJ-AB0715_02957	BJ-AB0868_02912	BJ-AB07104_03033	AB57_3002	ABK1_2889	ABBFA_000886	ABTW07_3008	ABTJ_00879	ACICU_02836	ACIAD2622	A1S_2594	ABAYE0902	ABZJ_03020	ABSDF0908
BJ-AB0715_02958	BJ-AB0868_02913	BJ-AB07104_03034	AB57_3003	ABK1_2890	ABBFA_000885	ABTW07_3009	ABTJ_00878	ACICU_02837	ACIAD2623	A1S_2595	ABAYE0901	ABZJ_03021	ABSDF0907
BJ-AB0715_02962	BJ-AB0868_02917	BJ-AB07104_03038	AB57_3007	ABK1_2894	ABBFA_000881	ABTW07_3013	ABTJ_00874	ACICU_02841	ACIAD2627	A1S_2598	ABAYE0897	ABZJ_03025	ABSDF0903
BJ-AB0715_02964	BJ-AB0868_02919	BJ-AB07104_03040	AB57_3009	ABK1_2896	ABBFA_000880	ABTW07_3015	ABTJ_00872	ACICU_02843	ACIAD2629	A1S_2600	ABAYE0894	ABZJ_03027	ABSDF0900
BJ-AB0715_02967	BJ-AB0868_02922	BJ-AB07104_03043	AB57_3012	ABK1_2901	ABBFA_000877	ABTW07_3069	ABTJ_00869	ACICU_02847	ACIAD2632	A1S_2603	ABAYE0891	ABZJ_03030	ABSDF0896
BJ-AB0715_02968	BJ-AB0868_02923	BJ-AB07104_03044	AB57_3013	ABK1_2902	ABBFA_000876	ABTW07_3070	ABTJ_00868	ACICU_02848	ACIAD2633	A1S_2604	ABAYE0890	ABZJ_03031	ABSDF0895
BJ-AB0715_02969	BJ-AB0868_02924	BJ-AB07104_03045	AB57_3014	ABK1_2903	ABBFA_000875	ABTW07_3071	ABTJ_00867	ACICU_02849	ACIAD2634	A1S_2605	ABAYE0889	ABZJ_03032	ABSDF0894
BJ-AB0715_02972	BJ-AB0868_02927	BJ-AB07104_03048	AB57_3017	ABK1_2906	ABBFA_000872	ABTW07_3074	ABTJ_00864	ACICU_02852	ACIAD2637	A1S_2608	ABAYE0886	ABZJ_03035	ABSDF0889
BJ-AB0715_02975	BJ-AB0868_02930	BJ-AB07104_03051	AB57_3021	ABK1_2908	ABBFA_000870	ABTW07_3077	ABTJ_00861	ACICU_02855	ACIAD2640	A1S_2611	ABAYE0883	ABZJ_03038	ABSDF0882
BJ-AB0715_02977	BJ-AB0868_02932	BJ-AB07104_03053	AB57_3023	ABK1_2910	ABBFA_000868	ABTW07_3079	ABTJ_00859	ACICU_02857	ACIAD2643	A1S_2614	ABAYE0881	ABZJ_03040	ABSDF0880
BJ-AB0715_02979	BJ-AB0868_02934	BJ-AB07104_03055	AB57_3025	ABK1_2912	ABBFA_000866	ABTW07_3081	ABTJ_00857	ACICU_02859	ACIAD2645	A1S_2616	ABAYE0879	ABZJ_03042	ABSDF0877
BJ-AB0715_02981	BJ-AB0868_02936	BJ-AB07104_03057	AB57_3027	ABK1_2913	ABBFA_000864	ABTW07_3082	ABTJ_00855	ACICU_02860	ACIAD2647	A1S_2617	ABAYE0877	ABZJ_03044	ABSDF0874
BJ-AB0715_02983	BJ-AB0868_02939	BJ-AB07104_03060	AB57_3030	ABK1_2916	ABBFA_000861	ABTW07_3084	ABTJ_00853	ACICU_02862	ACIAD2649	A1S_2620	ABAYE0874	ABZJ_03047	ABSDF0871
BJ-AB0715_02984	BJ-AB0868_02940	BJ-AB07104_03061	AB57_3031	ABK1_2917	ABBFA_000860	ABTW07_3085	ABTJ_00852	ACICU_02863	ACIAD2650	A1S_2621	ABAYE0873	ABZJ_03048	ABSDF0870
BJ-AB0715_02991	BJ-AB0868_02946	BJ-AB07104_03067	AB57_3037	ABK1_2923	ABBFA_000854	ABTW07_3091	ABTJ_00846	ACICU_02869	ACIAD2652	A1S_2626	ABAYE0867	ABZJ_03054	ABSDF0860
BJ-AB0715_02993	BJ-AB0868_02948	BJ-AB07104_03069	AB57_3039	ABK1_2925	ABBFA_000852	ABTW07_3093	ABTJ_00844	ACICU_02871	ACIAD2655	A1S_2628	ABAYE0865	ABZJ_03056	ABSDF0858
BJ-AB0715_02997	BJ-AB0868_02951	BJ-AB07104_03072	AB57_3043	ABK1_2928	ABBFA_000848	ABTW07_3096	ABTJ_00841	ACICU_02874	ACIAD2659	A1S_2631	ABAYE0861	ABZJ_03059	ABSDF0851
BJ-AB0715_02998	BJ-AB0868_02952	BJ-AB07104_03073	AB57_3044	ABK1_2929	ABBFA_000847	ABTW07_3097	ABTJ_00840	ACICU_02875	ACIAD2660	A1S_2632	ABAYE0860	ABZJ_03060	ABSDF0850
BJ-AB0715_03000	BJ-AB0868_02954	BJ-AB07104_03075	AB57_3046	ABK1_2931	ABBFA_000845	ABTW07_3099	ABTJ_00838	ACICU_02877	ACIAD2662	A1S_2633	ABAYE0858	ABZJ_03062	ABSDF0848
BJ-AB0715_03002	BJ-AB0868_02956	BJ-AB07104_03077	AB57_3048	ABK1_2933	ABBFA_000843	ABTW07_3100	ABTJ_00837	ACICU_02878	ACIAD2664	A1S_2634	ABAYE0856	ABZJ_03064	ABSDF0846
BJ-AB0715_03004	BJ-AB0868_02958	BJ-AB07104_03079	AB57_3050	ABK1_2936	ABBFA_000840	ABTW07_3102	ABTJ_00834	ACICU_02880	ACIAD2666	A1S_2636	ABAYE0854	ABZJ_03066	ABSDF0844
BJ-AB0715_03005	BJ-AB0868_02959	BJ-AB07104_03080	AB57_3051	ABK1_2937	ABBFA_000839	ABTW07_3103	ABTJ_00833	ACICU_02881	ACIAD2667	A1S_2637	ABAYE0853	ABZJ_03067	ABSDF0843
BJ-AB0715_03023	BJ-AB0868_02977	BJ-AB07104_03098	AB57_3071	ABK1_2954	ABBFA_000820	ABTW07_3120	ABTJ_00815	ACICU_02900	ACIAD2829	A1S_2656	ABAYE0832	ABZJ_03086	ABSDF0830
BJ-AB0715_03024	BJ-AB0868_02978	BJ-AB07104_03099	AB57_3072	ABK1_2955	ABBFA_000819	ABTW07_3121	ABTJ_00814	ACICU_02901	ACIAD2832	A1S_2657	ABAYE0831	ABZJ_03087	ABSDF0829
BJ-AB0715_03025	BJ-AB0868_02979	BJ-AB07104_03100	AB57_3073	ABK1_2956	ABBFA_000818	ABTW07_3122	ABTJ_00813	ACICU_02902	ACIAD2833	A1S_2658	ABAYE0829	ABZJ_03088	ABSDF0828
BJ-AB0715_03026	BJ-AB0868_02980	BJ-AB07104_03101	AB57_3074	ABK1_2957	ABBFA_000817	ABTW07_3123	ABTJ_00812	ACICU_02903	ACIAD2834	A1S_2659	ABAYE0828	ABZJ_03089	ABSDF0827
BJ-AB0715_03029	BJ-AB0868_02983	BJ-AB07104_03104	AB57_3077	ABK1_2960	ABBFA_000814	ABTW07_3126	ABTJ_00807	ACICU_02906	ACIAD0766	A1S_2662	ABAYE0825	ABZJ_03092	ABSDF0820
BJ-AB0715_03030	BJ-AB0868_02984	BJ-AB07104_03105	AB57_3078	ABK1_2961	ABBFA_000813	ABTW07_3127	ABTJ_00806	ACICU_02907	ACIAD2837	A1S_2663	ABAYE0824	ABZJ_03093	ABSDF0819
BJ-AB0715_03031	BJ-AB0868_02985	BJ-AB07104_03106	AB57_3079	ABK1_2962	ABBFA_000812	ABTW07_3128	ABTJ_00805	ACICU_02908	ACIAD2838	A1S_2664	ABAYE0823	ABZJ_03094	ABSDF0818
BJ-AB0715_03032	BJ-AB0868_02986	BJ-AB07104_03107	AB57_3080	ABK1_2963	ABBFA_000811	ABTW07_3129	ABTJ_00804	ACICU_02909	ACIAD2839	A1S_2665	ABAYE0822	ABZJ_03095	ABSDF0817
BJ-AB0715_03035	BJ-AB0868_02994	BJ-AB07104_03111	AB57_3085	ABK1_2967	ABBFA_000807	ABTW07_3133	ABTJ_00800	ACICU_02913	ACIAD2842	A1S_2668	ABAYE0818	ABZJ_03099	ABSDF0809
BJ-AB0715_03051	BJ-AB0868_02998	BJ-AB07104_03115	AB57_3089	ABK1_2971	ABBFA_000802	ABTW07_3137	ABTJ_00796	ACICU_02917	ACIAD2845	A1S_2672	ABAYE0814	ABZJ_03103	ABSDF0805
BJ-AB0715_03052	BJ-AB0868_02999	BJ-AB07104_03116	AB57_3090	ABK1_2972	ABBFA_000801	ABTW07_3138	ABTJ_00795	ACICU_02918	ACIAD2846	A1S_2673	ABAYE0813	ABZJ_03104	ABSDF0804
BJ-AB0715_03058	BJ-AB0868_03004	BJ-AB07104_03121	AB57_3095	ABK1_2977	ABBFA_000793	ABTW07_3143	ABTJ_00787	ACICU_02923	ACIAD2852	A1S_2680	ABAYE0807	ABZJ_03109	ABSDF0797
BJ-AB0715_03059	BJ-AB0868_03005	BJ-AB07104_03122	AB57_3096	ABK1_2978	ABBFA_000792	ABTW07_3144	ABTJ_00786	ACICU_02924	ACIAD2853	A1S_2681	ABAYE0806	ABZJ_03110	ABSDF0796
BJ-AB0715_03060	BJ-AB0868_03006	BJ-AB07104_03123	AB57_3097	ABK1_2979	ABBFA_000791	ABTW07_3145	ABTJ_00785	ACICU_02925	ACIAD2854	A1S_2682	ABAYE0805	ABZJ_03111	ABSDF0795
BJ-AB0715_03062	BJ-AB0868_03008	BJ-AB07104_03125	AB57_3099	ABK1_2981	ABBFA_000789	ABTW07_3147	ABTJ_00783	ACICU_02927	ACIAD2856	A1S_2684	ABAYE0803	ABZJ_03113	ABSDF0793
BJ-AB0715_03064	BJ-AB0868_03010	BJ-AB07104_03127	AB57_3101	ABK1_2983	ABBFA_000787	ABTW07_3149	ABTJ_00781	ACICU_02929	ACIAD2860	A1S_2686	ABAYE0801	ABZJ_03115	ABSDF0790
BJ-AB0715_03065	BJ-AB0868_03011	BJ-AB07104_03128	AB57_3102	ABK1_2984	ABBFA_000786	ABTW07_3150	ABTJ_00780	ACICU_02930	ACIAD2861	A1S_2687	ABAYE0800	ABZJ_03116	ABSDF0789
BJ-AB0715_03066	BJ-AB0868_03012	BJ-AB07104_03129	AB57_3103	ABK1_2985	ABBFA_000785	ABTW07_3151	ABTJ_00779	ACICU_02931	ACIAD2862	A1S_2688	ABAYE0799	ABZJ_03117	ABSDF0788
BJ-AB0715_03081	BJ-AB0868_03025	BJ-AB07104_03142	AB57_3122	ABK1_3005	ABBFA_000767	ABTW07_3174	ABTJ_00760	ACICU_02951	ACIAD2872	A1S_2719	ABAYE0784	ABZJ_03130	ABSDF0779
BJ-AB0715_03082	BJ-AB0868_03026	BJ-AB07104_03143	AB57_3123	ABK1_3006	ABBFA_000766	ABTW07_3175	ABTJ_00759	ACICU_02952	ACIAD2873	A1S_2718	ABAYE0783	ABZJ_03131	ABSDF0778
BJ-AB0715_03084	BJ-AB0868_03028	BJ-AB07104_03145	AB57_3125	ABK1_3008	ABBFA_000764	ABTW07_3177	ABTJ_00757	ACICU_02954	ACIAD2875	A1S_2716	ABAYE0781	ABZJ_03133	ABSDF0776
BJ-AB0715_03085	BJ-AB0868_03029	BJ-AB07104_03146	AB57_3126	ABK1_3009	ABBFA_000763	ABTW07_3178	ABTJ_00756	ACICU_02955	ACIAD2876	A1S_2715	ABAYE0780	ABZJ_03135	ABSDF0775
BJ-AB0715_03087	BJ-AB0868_03031	BJ-AB07104_03148	AB57_3128	ABK1_3010	ABBFA_000761	ABTW07_3179	ABTJ_00755	ACICU_02957	ACIAD2879	A1S_2714	ABAYE0777	ABZJ_03137	ABSDF0774
BJ-AB0715_03088	BJ-AB0868_03032	BJ-AB07104_03149	AB57_3129	ABK1_3011	ABBFA_000760	ABTW07_3180	ABTJ_00754	ACICU_02958	ACIAD2880	A1S_2713	ABAYE0776	ABZJ_03138	ABSDF0773
BJ-AB0715_03090	BJ-AB0868_03034	BJ-AB07104_03151	AB57_3131	ABK1_3013	ABBFA_000758	ABTW07_3182	ABTJ_00752	ACICU_02960	ACIAD2882	A1S_2711	ABAYE0774	ABZJ_03140	ABSDF0771
BJ-AB0715_03091	BJ-AB0868_03035	BJ-AB07104_03152	AB57_3132	ABK1_3014	ABBFA_000757	ABTW07_3183	ABTJ_00751	ACICU_02961	ACIAD2886	A1S_2710	ABAYE0773	ABZJ_03141	ABSDF0770
BJ-AB0715_03094	BJ-AB0868_03039	BJ-AB07104_03156	AB57_3135	ABK1_3018	ABBFA_000754	ABTW07_3189	ABTJ_00747	ACICU_02967	ACIAD2923	A1S_2707	ABAYE0770	ABZJ_03145	ABSDF0763
BJ-AB0715_03097	BJ-AB0868_03041	BJ-AB07104_03158	AB57_3137	ABK1_3020	ABBFA_000751	ABTW07_3190	ABTJ_00745	ACICU_02969	ACIAD2925	A1S_2706	ABAYE0767	ABZJ_03148	ABSDF0761
BJ-AB0715_03098	BJ-AB0868_03042	BJ-AB07104_03159	AB57_3138	ABK1_3021	ABBFA_000750	ABTW07_3191	ABTJ_00744	ACICU_02970	ACIAD2926	A1S_2705	ABAYE0766	ABZJ_03149	ABSDF0760
BJ-AB0715_03099	BJ-AB0868_03043	BJ-AB07104_03160	AB57_3139	ABK1_3022	ABBFA_000749	ABTW07_3192	ABTJ_00743	ACICU_02971	ACIAD2927	A1S_2704	ABAYE0765	ABZJ_03150	ABSDF0758
BJ-AB0715_03100	BJ-AB0868_03044	BJ-AB07104_03161	AB57_3140	ABK1_3023	ABBFA_000748	ABTW07_3193	ABTJ_00742	ACICU_02972	ACIAD2928	A1S_2703	ABAYE0764	ABZJ_03151	ABSDF0757
BJ-AB0715_03102	BJ-AB0868_03046	BJ-AB07104_03163	AB57_3142	ABK1_3025	ABBFA_000746	ABTW07_3195	ABTJ_00740	ACICU_02974	ACIAD2930	A1S_2701	ABAYE0762	ABZJ_03153	ABSDF0755
BJ-AB0715_03105	BJ-AB0868_03049	BJ-AB07104_03166	AB57_3145	ABK1_3028	ABBFA_000743	ABTW07_3198	ABTJ_00737	ACICU_02977	ACIAD2933	A1S_2698	ABAYE0759	ABZJ_03156	ABSDF0749
BJ-AB0715_03108	BJ-AB0868_03052	BJ-AB07104_03169	AB57_3148	ABK1_3031	ABBFA_000740	ABTW07_3201	ABTJ_00734	ACICU_02980	ACIAD2936	A1S_2728	ABAYE0756	ABZJ_03159	ABSDF0746
BJ-AB0715_03109	BJ-AB0868_03053	BJ-AB07104_03170	AB57_3149	ABK1_3032	ABBFA_000739	ABTW07_3202	ABTJ_00733	ACICU_02981	ACIAD2937	A1S_2729	ABAYE0755	ABZJ_03160	ABSDF0745
BJ-AB0715_03112	BJ-AB0868_03056	BJ-AB07104_03174	AB57_3153	ABK1_3035	ABBFA_000736	ABTW07_3205	ABTJ_00730	ACICU_02984	ACIAD2940	A1S_2732	ABAYE0751	ABZJ_03164	ABSDF0741
BJ-AB0715_03113	BJ-AB0868_03057	BJ-AB07104_03175	AB57_3154	ABK1_3036	ABBFA_000735	ABTW07_3206	ABTJ_00729	ACICU_02985	ACIAD2941	A1S_2733	ABAYE0750	ABZJ_03165	ABSDF0740
BJ-AB0715_03116	BJ-AB0868_03059	BJ-AB07104_03177	AB57_3156	ABK1_3038	ABBFA_000733	ABTW07_3208	ABTJ_00727	ACICU_02987	ACIAD2943	A1S_2735	ABAYE0748	ABZJ_03167	ABSDF0738
BJ-AB0715_03117	BJ-AB0868_03060	BJ-AB07104_03178	AB57_3157	ABK1_3039	ABBFA_000732	ABTW07_3209	ABTJ_00726	ACICU_02988	ACIAD2944	A1S_2736	ABAYE0747	ABZJ_03168	ABSDF0737
BJ-AB0715_03118	BJ-AB0868_03061	BJ-AB07104_03179	AB57_3158	ABK1_3040	ABBFA_000731	ABTW07_3210	ABTJ_00725	ACICU_02989	ACIAD2945	A1S_2737	ABAYE0746	ABZJ_03169	ABSDF0736
BJ-AB0715_03122	BJ-AB0868_03065	BJ-AB07104_03183	AB57_3162	ABK1_3044	ABBFA_000727	ABTW07_3214	ABTJ_00721	ACICU_02993	ACIAD2948	A1S_2740	ABAYE0742	ABZJ_03173	ABSDF0730
BJ-AB0715_03124	BJ-AB0868_03067	BJ-AB07104_03185	AB57_3164	ABK1_3046	ABBFA_000725	ABTW07_3216	ABTJ_00719	ACICU_02995	ACIAD2950	A1S_2742	ABAYE0740	ABZJ_03175	ABSDF0728
BJ-AB0715_03136	BJ-AB0868_03079	BJ-AB07104_03196	AB57_3176	ABK1_3057	ABBFA_000715	ABTW07_3227	ABTJ_00708	ACICU_03006	ACIAD2963	A1S_2754	ABAYE0728	ABZJ_03187	ABSDF0720
BJ-AB0715_03137	BJ-AB0868_03080	BJ-AB07104_03197	AB57_3177	ABK1_3058	ABBFA_000714	ABTW07_3228	ABTJ_00707	ACICU_03007	ACIAD2964	A1S_2755	ABAYE0727	ABZJ_03188	ABSDF0719
BJ-AB0715_03138	BJ-AB0868_03081	BJ-AB07104_03198	AB57_3178	ABK1_3059	ABBFA_000713	ABTW07_3229	ABTJ_00706	ACICU_03008	ACIAD2965	A1S_2756	ABAYE0726	ABZJ_03189	ABSDF0718
BJ-AB0715_03142	BJ-AB0868_03085	BJ-AB07104_03202	AB57_3182	ABK1_3063	ABBFA_000708	ABTW07_3233	ABTJ_00702	ACICU_03012	ACIAD2968	A1S_2760	ABAYE0722	ABZJ_03193	ABSDF0714
BJ-AB0715_03143	BJ-AB0868_03086	BJ-AB07104_03203	AB57_3183	ABK1_3064	ABBFA_000707	ABTW07_3234	ABTJ_00701	ACICU_03013	ACIAD2700	A1S_2761	ABAYE0721	ABZJ_03194	ABSDF0713
BJ-AB0715_03169	BJ-AB0868_03164	BJ-AB07104_03207	AB57_3266	ABK1_3068	ABBFA_000702	ABTW07_3237	ABTJ_00697	ACICU_03016	ACIAD1743	A1S_2766	ABAYE0718	ABZJ_03198	ABSDF0698
BJ-AB0715_03171	BJ-AB0868_03166	BJ-AB07104_03209	AB57_3268	ABK1_3070	ABBFA_000700	ABTW07_3239	ABTJ_00695	ACICU_03018	ACIAD1642	A1S_2768	ABAYE0716	ABZJ_03200	ABSDF0696
BJ-AB0715_03179	BJ-AB0868_03174	BJ-AB07104_03217	AB57_3277	ABK1_3078	ABBFA_000691	ABTW07_3247	ABTJ_00687	ACICU_03026	ACIAD0832	A1S_2776	ABAYE0708	ABZJ_03209	ABSDF0686
BJ-AB0715_03181	BJ-AB0868_03176	BJ-AB07104_03219	AB57_3279	ABK1_3080	ABBFA_000689	ABTW07_3249	ABTJ_00685	ACICU_03028	ACIAD0830	A1S_2777	ABAYE0705	ABZJ_03211	ABSDF0684
BJ-AB0715_03184	BJ-AB0868_03179	BJ-AB07104_03222	AB57_3282	ABK1_3083	ABBFA_000686	ABTW07_3252	ABTJ_00682	ACICU_03031	ACIAD0826	A1S_2780	ABAYE0701	ABZJ_03214	ABSDF0681
BJ-AB0715_03185	BJ-AB0868_03180	BJ-AB07104_03223	AB57_3283	ABK1_3084	ABBFA_000685	ABTW07_3253	ABTJ_00681	ACICU_03032	ACIAD0825	A1S_2781	ABAYE0700	ABZJ_03215	ABSDF0680
BJ-AB0715_03187	BJ-AB0868_03182	BJ-AB07104_03225	AB57_3285	ABK1_3086	ABBFA_000683	ABTW07_3255	ABTJ_00679	ACICU_03034	ACIAD0823	A1S_2783	ABAYE0698	ABZJ_03217	ABSDF0678
BJ-AB0715_03188	BJ-AB0868_03183	BJ-AB07104_03226	AB57_3286	ABK1_3087	ABBFA_000682	ABTW07_3256	ABTJ_00678	ACICU_03035	ACIAD0822	A1S_2784	ABAYE0697	ABZJ_03218	ABSDF0677
BJ-AB0715_03189	BJ-AB0868_03185	BJ-AB07104_03228	AB57_3287	ABK1_3089	ABBFA_000681	ABTW07_3258	ABTJ_00676	ACICU_03037	ACIAD0808	A1S_2785	ABAYE0696	ABZJ_03220	ABSDF0676
BJ-AB0715_03192	BJ-AB0868_03188	BJ-AB07104_03231	AB57_3290	ABK1_3092	ABBFA_000678	ABTW07_3261	ABTJ_00673	ACICU_03040	ACIAD0814	A1S_2788	ABAYE0693	ABZJ_03223	ABSDF0673
BJ-AB0715_03194	BJ-AB0868_03189	BJ-AB07104_03232	AB57_3291	ABK1_3093	ABBFA_000677	ABTW07_3262	ABTJ_00672	ACICU_03041	ACIAD0809	A1S_2790	ABAYE0692	ABZJ_03224	ABSDF0672
BJ-AB0715_03196	BJ-AB0868_03191	BJ-AB07104_03234	AB57_3293	ABK1_3095	ABBFA_000675	ABTW07_3264	ABTJ_00670	ACICU_03043	ACIAD0806	A1S_2792	ABAYE0690	ABZJ_03226	ABSDF0670
BJ-AB0715_03201	BJ-AB0868_03196	BJ-AB07104_03239	AB57_3298	ABK1_3100	ABBFA_000670	ABTW07_3269	ABTJ_00666	ACICU_03048	ACIAD0802	A1S_2795	ABAYE0685	ABZJ_03231	ABSDF0660
BJ-AB0715_03202	BJ-AB0868_03197	BJ-AB07104_03240	AB57_3299	ABK1_3101	ABBFA_000669	ABTW07_3270	ABTJ_00665	ACICU_03049	ACIAD0801	A1S_2796	ABAYE0684	ABZJ_03232	ABSDF0659
BJ-AB0715_03204	BJ-AB0868_03199	BJ-AB07104_03242	AB57_3301	ABK1_3103	ABBFA_000667	ABTW07_3272	ABTJ_00663	ACICU_03051	ACIAD0799	A1S_2798	ABAYE0682	ABZJ_03234	ABSDF0657
BJ-AB0715_03206	BJ-AB0868_03201	BJ-AB07104_03244	AB57_3303	ABK1_3105	ABBFA_000659	ABTW07_3274	ABTJ_00655	ACICU_03053	ACIAD0795	A1S_2806	ABAYE0680	ABZJ_03236	ABSDF0653
BJ-AB0715_03210	BJ-AB0868_03205	BJ-AB07104_03248	AB57_3307	ABK1_3109	ABBFA_000655	ABTW07_3277	ABTJ_00651	ACICU_03057	ACIAD0791	A1S_2810	ABAYE0676	ABZJ_03240	ABSDF0647
BJ-AB0715_03216	BJ-AB0868_03211	BJ-AB07104_03254	AB57_3315	ABK1_3115	ABBFA_000647	ABTW07_3283	ABTJ_00645	ACICU_03063	ACIAD0786	A1S_2815	ABAYE0667	ABZJ_03246	ABSDF0638
BJ-AB0715_03218	BJ-AB0868_03213	BJ-AB07104_03256	AB57_3317	ABK1_3117	ABBFA_000645	ABTW07_3285	ABTJ_00643	ACICU_03065	ACIAD0784	A1S_2817	ABAYE0665	ABZJ_03248	ABSDF0635
BJ-AB0715_03219	BJ-AB0868_03214	BJ-AB07104_03257	AB57_3318	ABK1_3118	ABBFA_000644	ABTW07_3286	ABTJ_00642	ACICU_03066	ACIAD0783	A1S_2818	ABAYE0664	ABZJ_03249	ABSDF0634
BJ-AB0715_03220	BJ-AB0868_03215	BJ-AB07104_03258	AB57_3319	ABK1_3119	ABBFA_000643	ABTW07_3287	ABTJ_00641	ACICU_03067	ACIAD0782	A1S_2819	ABAYE0663	ABZJ_03250	ABSDF0632
BJ-AB0715_03221	BJ-AB0868_03216	BJ-AB07104_03259	AB57_3320	ABK1_3120	ABBFA_000642	ABTW07_3288	ABTJ_00640	ACICU_03068	ACIAD0721	A1S_2820	ABAYE0662	ABZJ_03251	ABSDF0631
BJ-AB0715_03222	BJ-AB0868_03217	BJ-AB07104_03260	AB57_3321	ABK1_3121	ABBFA_000641	ABTW07_3289	ABTJ_00639	ACICU_03069	ACIAD0719	A1S_2821	ABAYE0661	ABZJ_03252	ABSDF0630
BJ-AB0715_03225	BJ-AB0868_03220	BJ-AB07104_03263	AB57_3324	ABK1_3124	ABBFA_000638	ABTW07_3292	ABTJ_00636	ACICU_03072	ACIAD0714	A1S_2824	ABAYE0658	ABZJ_03255	ABSDF0627
BJ-AB0715_03233	BJ-AB0868_03231	BJ-AB07104_03274	AB57_3333	ABK1_3132	ABBFA_000630	ABTW07_3300	ABTJ_00625	ACICU_03080	ACIAD0706	A1S_2832	ABAYE0649	ABZJ_03264	ABSDF0615
BJ-AB0715_03235	BJ-AB0868_03233	BJ-AB07104_03276	AB57_3335	ABK1_3134	ABBFA_000628	ABTW07_3302	ABTJ_00623	ACICU_03082	ACIAD0704	A1S_2834	ABAYE0647	ABZJ_03266	ABSDF0613
BJ-AB0715_03236	BJ-AB0868_03235	BJ-AB07104_03277	AB57_3336	ABK1_3135	ABBFA_000627	ABTW07_3303	ABTJ_00622	ACICU_03083	ACIAD0703	A1S_2835	ABAYE0646	ABZJ_03267	ABSDF0612
BJ-AB0715_03237	BJ-AB0868_03236	BJ-AB07104_03278	AB57_3338	ABK1_3136	ABBFA_000626	ABTW07_3304	ABTJ_00621	ACICU_03084	ACIAD0702	A1S_2836	ABAYE0645	ABZJ_03268	ABSDF0611
BJ-AB0715_03239	BJ-AB0868_03238	BJ-AB07104_03280	AB57_3341	ABK1_3138	ABBFA_000624	ABTW07_3306	ABTJ_00619	ACICU_03086	ACIAD0700	A1S_2838	ABAYE0643	ABZJ_03270	ABSDF0609
BJ-AB0715_03242	BJ-AB0868_03241	BJ-AB07104_03283	AB57_3344	ABK1_3141	ABBFA_000621	ABTW07_3309	ABTJ_00616	ACICU_03089	ACIAD0697	A1S_2840	ABAYE0640	ABZJ_03273	ABSDF0605
BJ-AB0715_03244	BJ-AB0868_03243	BJ-AB07104_03285	AB57_3346	ABK1_3143	ABBFA_000619	ABTW07_3311	ABTJ_00614	ACICU_03091	ACIAD0694	A1S_2842	ABAYE0638	ABZJ_03275	ABSDF0602
BJ-AB0715_03248	BJ-AB0868_03247	BJ-AB07104_03289	AB57_3350	ABK1_3147	ABBFA_000615	ABTW07_3315	ABTJ_00610	ACICU_03095	ACIAD2982	A1S_2846	ABAYE0634	ABZJ_03279	ABSDF0597
BJ-AB0715_03251	BJ-AB0868_03250	BJ-AB07104_03292	AB57_3353	ABK1_3150	ABBFA_000612	ABTW07_3317	ABTJ_00608	ACICU_03097	ACIAD2984	A1S_2849	ABAYE0632	ABZJ_03282	ABSDF0595
BJ-AB0715_03252	BJ-AB0868_03251	BJ-AB07104_03293	AB57_3354	ABK1_3151	ABBFA_000611	ABTW07_3318	ABTJ_00607	ACICU_03098	ACIAD2985	A1S_2850	ABAYE0631	ABZJ_03283	ABSDF0594
BJ-AB0715_03253	BJ-AB0868_03252	BJ-AB07104_03294	AB57_3355	ABK1_3152	ABBFA_000610	ABTW07_3319	ABTJ_00606	ACICU_03099	ACIAD2986	A1S_2851	ABAYE0630	ABZJ_03284	ABSDF0592
BJ-AB0715_03263	BJ-AB0868_03263	BJ-AB07104_03305	AB57_3366	ABK1_3163	ABBFA_000599	ABTW07_3330	ABTJ_00595	ACICU_03110	ACIAD0648	A1S_2862	ABAYE0620	ABZJ_03293	ABSDF0582
BJ-AB0715_03270	BJ-AB0868_03270	BJ-AB07104_03312	AB57_3373	ABK1_3170	ABBFA_000592	ABTW07_3337	ABTJ_00588	ACICU_03117	ACIAD0642	A1S_2870	ABAYE0613	ABZJ_03300	ABSDF0573
BJ-AB0715_03274	BJ-AB0868_03274	BJ-AB07104_03316	AB57_3377	ABK1_3173	ABBFA_000589	ABTW07_3340	ABTJ_00585	ACICU_03120	ACIAD0639	A1S_2873	ABAYE0610	ABZJ_03304	ABSDF0568
BJ-AB0715_03276	BJ-AB0868_03276	BJ-AB07104_03318	AB57_3379	ABK1_3175	ABBFA_000587	ABTW07_3342	ABTJ_00583	ACICU_03122	ACIAD0636	A1S_2875	ABAYE0608	ABZJ_03306	ABSDF0565
BJ-AB0715_03282	BJ-AB0868_03282	BJ-AB07104_03324	AB57_3385	ABK1_3182	ABBFA_000581	ABTW07_3348	ABTJ_00576	ACICU_03128	ACIAD0630	A1S_2881	ABAYE0602	ABZJ_03312	ABSDF0554
BJ-AB0715_03283	BJ-AB0868_03283	BJ-AB07104_03325	AB57_3386	ABK1_3183	ABBFA_000580	ABTW07_3349	ABTJ_00575	ACICU_03129	ACIAD0629	A1S_2882	ABAYE0601	ABZJ_03313	ABSDF0553
BJ-AB0715_03284	BJ-AB0868_03284	BJ-AB07104_03326	AB57_3387	ABK1_3184	ABBFA_000579	ABTW07_3350	ABTJ_00574	ACICU_03130	ACIAD0627	A1S_2883	ABAYE0600	ABZJ_03314	ABSDF0552
BJ-AB0715_03285	BJ-AB0868_03285	BJ-AB07104_03327	AB57_3388	ABK1_3185	ABBFA_000578	ABTW07_3351	ABTJ_00573	ACICU_03131	ACIAD0626	A1S_2884	ABAYE0599	ABZJ_03315	ABSDF0551
BJ-AB0715_03287	BJ-AB0868_03287	BJ-AB07104_03329	AB57_3390	ABK1_3187	ABBFA_000576	ABTW07_3353	ABTJ_00571	ACICU_03133	ACIAD0624	A1S_2886	ABAYE0597	ABZJ_03317	ABSDF0549
BJ-AB0715_03288	BJ-AB0868_03288	BJ-AB07104_03330	AB57_3391	ABK1_3188	ABBFA_000575	ABTW07_3354	ABTJ_00570	ACICU_03134	ACIAD0623	A1S_2887	ABAYE0596	ABZJ_03318	ABSDF0548
BJ-AB0715_03292	BJ-AB0868_03294	BJ-AB07104_03336	AB57_3395	ABK1_3194	ABBFA_000571	ABTW07_3360	ABTJ_00564	ACICU_03141	ACIAD0613	A1S_2891	ABAYE0592	ABZJ_03324	ABSDF0542
BJ-AB0715_03293	BJ-AB0868_03295	BJ-AB07104_03337	AB57_3396	ABK1_3195	ABBFA_000570	ABTW07_3361	ABTJ_00563	ACICU_03142	ACIAD0611	A1S_2892	ABAYE0591	ABZJ_03325	ABSDF0541
BJ-AB0715_03296	BJ-AB0868_03297	BJ-AB07104_03340	AB57_3398	ABK1_3197	ABBFA_000568	ABTW07_3363	ABTJ_00561	ACICU_03144	ACIAD0609	A1S_2894	ABAYE0588	ABZJ_03328	ABSDF0538
BJ-AB0715_03303	BJ-AB0868_03302	BJ-AB07104_03345	AB57_3404	ABK1_3202	ABBFA_000563	ABTW07_3368	ABTJ_00556	ACICU_03149	ACIAD0603	A1S_2898	ABAYE0583	ABZJ_03333	ABSDF0531
BJ-AB0715_03304	BJ-AB0868_03303	BJ-AB07104_03346	AB57_3403	ABK1_3203	ABBFA_000562	ABTW07_3369	ABTJ_00555	ACICU_03150	ACIAD0602	A1S_2899	ABAYE0582	ABZJ_03334	ABSDF0530
BJ-AB0715_03306	BJ-AB0868_03305	BJ-AB07104_03348	AB57_3406	ABK1_3205	ABBFA_000560	ABTW07_3371	ABTJ_00553	ACICU_03152	ACIAD0600	A1S_2901	ABAYE0580	ABZJ_03336	ABSDF0528
BJ-AB0715_03307	BJ-AB0868_03306	BJ-AB07104_03349	AB57_3407	ABK1_3206	ABBFA_000559	ABTW07_3372	ABTJ_00552	ACICU_03153	ACIAD0599	A1S_2902	ABAYE0579	ABZJ_03337	ABSDF0527
BJ-AB0715_03308	BJ-AB0868_03307	BJ-AB07104_03350	AB57_3408	ABK1_3207	ABBFA_000558	ABTW07_3373	ABTJ_00551	ACICU_03154	ACIAD0598	A1S_2903	ABAYE0578	ABZJ_03338	ABSDF0526
BJ-AB0715_03309	BJ-AB0868_03308	BJ-AB07104_03351	AB57_3409	ABK1_3208	ABBFA_000557	ABTW07_3374	ABTJ_00550	ACICU_03155	ACIAD0597	A1S_2904	ABAYE0577	ABZJ_03339	ABSDF0525
BJ-AB0715_03310	BJ-AB0868_03309	BJ-AB07104_03352	AB57_3410	ABK1_3209	ABBFA_000556	ABTW07_3375	ABTJ_00549	ACICU_03156	ACIAD0596	A1S_2905	ABAYE0576	ABZJ_03340	ABSDF0524
BJ-AB0715_03312	BJ-AB0868_03311	BJ-AB07104_03357	AB57_3412	ABK1_3214	ABBFA_000553	ABTW07_3377	ABTJ_00542	ACICU_03161	ACIAD0591	A1S_2910	ABAYE0531	ABZJ_03346	ABSDF0521
BJ-AB0715_03316	BJ-AB0868_03314	BJ-AB07104_03360	AB57_3415	ABK1_3217	ABBFA_000550	ABTW07_3380	ABTJ_00539	ACICU_03164	ACIAD0590	A1S_2912	ABAYE0528	ABZJ_03349	ABSDF0518
BJ-AB0715_03318	BJ-AB0868_03316	BJ-AB07104_03362	AB57_3417	ABK1_3219	ABBFA_000548	ABTW07_3382	ABTJ_00537	ACICU_03166	ACIAD0588	A1S_2914	ABAYE0526	ABZJ_03351	ABSDF0516
BJ-AB0715_03320	BJ-AB0868_03318	BJ-AB07104_03364	AB57_3419	ABK1_3221	ABBFA_000546	ABTW07_3384	ABTJ_00535	ACICU_03168	ACIAD3125	A1S_2917	ABAYE0524	ABZJ_03353	ABSDF0514
BJ-AB0715_03324	BJ-AB0868_03321	BJ-AB07104_03367	AB57_3423	ABK1_3224	ABBFA_000543	ABTW07_3387	ABTJ_00532	ACICU_03171	ACIAD3131	A1S_2920	ABAYE0521	ABZJ_03357	ABSDF0509
BJ-AB0715_03328	BJ-AB0868_03325	BJ-AB07104_03371	AB57_3428	ABK1_3228	ABBFA_000539	ABTW07_3391	ABTJ_00528	ACICU_03175	ACIAD3135	A1S_2923	ABAYE0517	ABZJ_03360	ABSDF0505
BJ-AB0715_03329	BJ-AB0868_03326	BJ-AB07104_03372	AB57_3427	ABK1_3229	ABBFA_000538	ABTW07_3392	ABTJ_00527	ACICU_03176	ACIAD3136	A1S_2924	ABAYE0516	ABZJ_03361	ABSDF0504
BJ-AB0715_03332	BJ-AB0868_03329	BJ-AB07104_03375	AB57_3431	ABK1_3232	ABBFA_000535	ABTW07_3395	ABTJ_00524	ACICU_03180	ACIAD3139	A1S_2947	ABAYE0513	ABZJ_03364	ABSDF0501
BJ-AB0715_03337	BJ-AB0868_03334	BJ-AB07104_03380	AB57_3436	ABK1_3237	ABBFA_000531	ABTW07_3400	ABTJ_00519	ACICU_03185	ACIAD3145	A1S_2952	ABAYE0505	ABZJ_03369	ABSDF0493
BJ-AB0715_03340	BJ-AB0868_03337	BJ-AB07104_03382	AB57_3438	ABK1_3238	ABBFA_000527	ABTW07_3402	ABTJ_00512	ACICU_03186	ACIAD0655	A1S_2985	ABAYE0502	ABZJ_03370	ABSDF2848
BJ-AB0715_03346	BJ-AB0868_03343	BJ-AB07104_03388	AB57_3444	ABK1_3244	ABBFA_000522	ABTW07_3408	ABTJ_00506	ACICU_03192	ACIAD3005	A1S_2991	ABAYE0495	ABZJ_03376	ABSDF2856
BJ-AB0715_03347	BJ-AB0868_03344	BJ-AB07104_03389	AB57_3445	ABK1_3245	ABBFA_000521	ABTW07_3409	ABTJ_00505	ACICU_03193	ACIAD3006	A1S_2994	ABAYE0494	ABZJ_03377	ABSDF2857
BJ-AB0715_03348	BJ-AB0868_03345	BJ-AB07104_03390	AB57_3446	ABK1_3246	ABBFA_000520	ABTW07_3410	ABTJ_00504	ACICU_03194	ACIAD3007	A1S_2995	ABAYE0493	ABZJ_03378	ABSDF2858
BJ-AB0715_03350	BJ-AB0868_03347	BJ-AB07104_03392	AB57_3448	ABK1_3248	ABBFA_000518	ABTW07_3412	ABTJ_00502	ACICU_03196	ACIAD3008	A1S_2997	ABAYE0491	ABZJ_03380	ABSDF2860
BJ-AB0715_03352	BJ-AB0868_03349	BJ-AB07104_03394	AB57_3450	ABK1_3250	ABBFA_000517	ABTW07_3414	ABTJ_00500	ACICU_03198	ACIAD3010	A1S_2999	ABAYE0489	ABZJ_03382	ABSDF2862
BJ-AB0715_03353	BJ-AB0868_03350	BJ-AB07104_03395	AB57_3451	ABK1_3251	ABBFA_000516	ABTW07_3415	ABTJ_00499	ACICU_03199	ACIAD3012	A1S_3000	ABAYE0488	ABZJ_03383	ABSDF2863
BJ-AB0715_03357	BJ-AB0868_03354	BJ-AB07104_03399	AB57_3455	ABK1_3255	ABBFA_000512	ABTW07_3419	ABTJ_00495	ACICU_03203	ACIAD3016	A1S_3004	ABAYE0484	ABZJ_03387	ABSDF2867
BJ-AB0715_03374	BJ-AB0868_03370	BJ-AB07104_03414	AB57_3471	ABK1_3269	ABBFA_000495	ABTW07_3434	ABTJ_00475	ACICU_03219	ACIAD3151	A1S_3022	ABAYE0468	ABZJ_03401	ABSDF0485
BJ-AB0715_03377	BJ-AB0868_03373	BJ-AB07104_03417	AB57_3474	ABK1_3272	ABBFA_000492	ABTW07_3437	ABTJ_00472	ACICU_03222	ACIAD3155	A1S_3025	ABAYE0465	ABZJ_03404	ABSDF0482
BJ-AB0715_03379	BJ-AB0868_03375	BJ-AB07104_03419	AB57_3476	ABK1_3274	ABBFA_000490	ABTW07_3439	ABTJ_00470	ACICU_03224	ACIAD3157	A1S_3027	ABAYE0463	ABZJ_03406	ABSDF0480
BJ-AB0715_03381	BJ-AB0868_03377	BJ-AB07104_03421	AB57_3478	ABK1_3276	ABBFA_000488	ABTW07_3441	ABTJ_00468	ACICU_03226	ACIAD3159	A1S_3030	ABAYE0461	ABZJ_03408	ABSDF0478
BJ-AB0715_03385	BJ-AB0868_03381	BJ-AB07104_03425	AB57_3482	ABK1_3280	ABBFA_000484	ABTW07_3445	ABTJ_00464	ACICU_03230	ACIAD3163	A1S_3034	ABAYE0457	ABZJ_03412	ABSDF0472
BJ-AB0715_03387	BJ-AB0868_03383	BJ-AB07104_03427	AB57_3484	ABK1_3282	ABBFA_000482	ABTW07_3447	ABTJ_00462	ACICU_03232	ACIAD3167	A1S_3036	ABAYE0455	ABZJ_03414	ABSDF0470
BJ-AB0715_03388	BJ-AB0868_03384	BJ-AB07104_03428	AB57_3485	ABK1_3283	ABBFA_000481	ABTW07_3448	ABTJ_00461	ACICU_03233	ACIAD3168	A1S_3037	ABAYE0454	ABZJ_03415	ABSDF0469
BJ-AB0715_03391	BJ-AB0868_03387	BJ-AB07104_03431	AB57_3488	ABK1_3286	ABBFA_000478	ABTW07_3451	ABTJ_00458	ACICU_03236	ACIAD3172	A1S_3040	ABAYE0451	ABZJ_03418	ABSDF0466
BJ-AB0715_03397	BJ-AB0868_03393	BJ-AB07104_03436	AB57_3493	ABK1_3291	ABBFA_000469	ABTW07_3456	ABTJ_00449	ACICU_03241	ACIAD3179	A1S_3045	ABAYE0445	ABZJ_03423	ABSDF0461
BJ-AB0715_03399	BJ-AB0868_03395	BJ-AB07104_03438	AB57_3495	ABK1_3293	ABBFA_000467	ABTW07_3458	ABTJ_00447	ACICU_03243	ACIAD3183	A1S_3048	ABAYE0443	ABZJ_03425	ABSDF0459
BJ-AB0715_03401	BJ-AB0868_03397	BJ-AB07104_03440	AB57_3497	ABK1_3295	ABBFA_000465	ABTW07_3460	ABTJ_00445	ACICU_03245	ACIAD3184	A1S_3049	ABAYE0441	ABZJ_03427	ABSDF0456
BJ-AB0715_03403	BJ-AB0868_03399	BJ-AB07104_03442	AB57_3499	ABK1_3297	ABBFA_000463	ABTW07_3462	ABTJ_00443	ACICU_03247	ACIAD3186	A1S_3051	ABAYE0439	ABZJ_03429	ABSDF0454
BJ-AB0715_03405	BJ-AB0868_03401	BJ-AB07104_03444	AB57_3501	ABK1_3299	ABBFA_000461	ABTW07_3464	ABTJ_00440	ACICU_03249	ACIAD3189	A1S_3052	ABAYE0437	ABZJ_03432	ABSDF0452
BJ-AB0715_03406	BJ-AB0868_03402	BJ-AB07104_03445	AB57_3502	ABK1_3300	ABBFA_000460	ABTW07_3465	ABTJ_00439	ACICU_03250	ACIAD3191	A1S_3053	ABAYE0436	ABZJ_03433	ABSDF0451
BJ-AB0715_03407	BJ-AB0868_03403	BJ-AB07104_03446	AB57_3503	ABK1_3301	ABBFA_000459	ABTW07_3466	ABTJ_00438	ACICU_03251	ACIAD3192	A1S_3054	ABAYE0435	ABZJ_03434	ABSDF0450
BJ-AB0715_03408	BJ-AB0868_03404	BJ-AB07104_03447	AB57_3504	ABK1_3302	ABBFA_000458	ABTW07_3467	ABTJ_00437	ACICU_03252	ACIAD3193	A1S_3055	ABAYE0434	ABZJ_03435	ABSDF0449
BJ-AB0715_03409	BJ-AB0868_03405	BJ-AB07104_03448	AB57_3505	ABK1_3303	ABBFA_000457	ABTW07_3468	ABTJ_00436	ACICU_03253	ACIAD3194	A1S_3056	ABAYE0433	ABZJ_03436	ABSDF0448
BJ-AB0715_03412	BJ-AB0868_03408	BJ-AB07104_03451	AB57_3508	ABK1_3306	ABBFA_000454	ABTW07_3471	ABTJ_00433	ACICU_03256	ACIAD3197	A1S_3059	ABAYE0430	ABZJ_03439	ABSDF0445
BJ-AB0715_03414	BJ-AB0868_03410	BJ-AB07104_03453	AB57_3510	ABK1_3308	ABBFA_000452	ABTW07_3472	ABTJ_00431	ACICU_03258	ACIAD3199	A1S_3061	ABAYE0428	ABZJ_03441	ABSDF0443
BJ-AB0715_03415	BJ-AB0868_03411	BJ-AB07104_03454	AB57_3511	ABK1_3309	ABBFA_000451	ABTW07_3473	ABTJ_00430	ACICU_03259	ACIAD3200	A1S_3062	ABAYE0427	ABZJ_03442	ABSDF0442
BJ-AB0715_03416	BJ-AB0868_03412	BJ-AB07104_03455	AB57_3512	ABK1_3310	ABBFA_000450	ABTW07_3474	ABTJ_00429	ACICU_03260	ACIAD3201	A1S_3063	ABAYE0426	ABZJ_03443	ABSDF0441
BJ-AB0715_03418	BJ-AB0868_03414	BJ-AB07104_03457	AB57_3514	ABK1_3312	ABBFA_000448	ABTW07_3476	ABTJ_00427	ACICU_03262	ACIAD3203	A1S_3065	ABAYE0424	ABZJ_03445	ABSDF0439
BJ-AB0715_03419	BJ-AB0868_03415	BJ-AB07104_03458	AB57_3515	ABK1_3313	ABBFA_000447	ABTW07_3477	ABTJ_00426	ACICU_03263	ACIAD3204	A1S_3066	ABAYE0423	ABZJ_03446	ABSDF0438
BJ-AB0715_03420	BJ-AB0868_03416	BJ-AB07104_03459	AB57_3516	ABK1_3314	ABBFA_000446	ABTW07_3478	ABTJ_00425	ACICU_03264	ACIAD3205	A1S_3067	ABAYE0422	ABZJ_03447	ABSDF0437
BJ-AB0715_03421	BJ-AB0868_03417	BJ-AB07104_03460	AB57_3517	ABK1_3315	ABBFA_000445	ABTW07_3479	ABTJ_00424	ACICU_03265	ACIAD3206	A1S_3068	ABAYE0421	ABZJ_03448	ABSDF0436
BJ-AB0715_03422	BJ-AB0868_03418	BJ-AB07104_03461	AB57_3518	ABK1_3316	ABBFA_000444	ABTW07_3480	ABTJ_00423	ACICU_03266	ACIAD3207	A1S_3069	ABAYE0420	ABZJ_03449	ABSDF0435
BJ-AB0715_03423	BJ-AB0868_03419	BJ-AB07104_03462	AB57_3519	ABK1_3317	ABBFA_000443	ABTW07_3481	ABTJ_00422	ACICU_03267	ACIAD3208	A1S_3070	ABAYE0419	ABZJ_03450	ABSDF0434
BJ-AB0715_03424	BJ-AB0868_03420	BJ-AB07104_03463	AB57_3520	ABK1_3318	ABBFA_000442	ABTW07_3482	ABTJ_00421	ACICU_03269	ACIAD3209	A1S_3071	ABAYE0418	ABZJ_03451	ABSDF0433
BJ-AB0715_03426	BJ-AB0868_03422	BJ-AB07104_03465	AB57_3522	ABK1_3320	ABBFA_000440	ABTW07_3484	ABTJ_00419	ACICU_03271	ACIAD3211	A1S_3073	ABAYE0416	ABZJ_03453	ABSDF0431
BJ-AB0715_03427	BJ-AB0868_03423	BJ-AB07104_03466	AB57_3523	ABK1_3321	ABBFA_000439	ABTW07_3485	ABTJ_00418	ACICU_03272	ACIAD3212	A1S_3074	ABAYE0415	ABZJ_03454	ABSDF0430
BJ-AB0715_03429	BJ-AB0868_03425	BJ-AB07104_03468	AB57_3525	ABK1_3323	ABBFA_000437	ABTW07_3487	ABTJ_00416	ACICU_03275	ACIAD3214	A1S_3076	ABAYE0413	ABZJ_03456	ABSDF0428
BJ-AB0715_03431	BJ-AB0868_03427	BJ-AB07104_03470	AB57_3527	ABK1_3325	ABBFA_000435	ABTW07_3489	ABTJ_00414	ACICU_03277	ACIAD3216	A1S_3077	ABAYE0411	ABZJ_03458	ABSDF0426
BJ-AB0715_03432	BJ-AB0868_03428	BJ-AB07104_03471	AB57_3528	ABK1_3326	ABBFA_000434	ABTW07_3490	ABTJ_00413	ACICU_03278	ACIAD3217	A1S_3078	ABAYE0410	ABZJ_03459	ABSDF0425
BJ-AB0715_03433	BJ-AB0868_03429	BJ-AB07104_03472	AB57_3529	ABK1_3327	ABBFA_000433	ABTW07_3491	ABTJ_00412	ACICU_03279	ACIAD3218	A1S_3079	ABAYE0409	ABZJ_03460	ABSDF0424
BJ-AB0715_03434	BJ-AB0868_03430	BJ-AB07104_03473	AB57_3530	ABK1_3328	ABBFA_000432	ABTW07_3492	ABTJ_00411	ACICU_03280	ACIAD3219	A1S_3080	ABAYE0408	ABZJ_03461	ABSDF0423
BJ-AB0715_03435	BJ-AB0868_03431	BJ-AB07104_03474	AB57_3531	ABK1_3329	ABBFA_000431	ABTW07_3493	ABTJ_00410	ACICU_03281	ACIAD3220	A1S_3081	ABAYE0407	ABZJ_03462	ABSDF0422
BJ-AB0715_03436	BJ-AB0868_03432	BJ-AB07104_03475	AB57_3532	ABK1_3330	ABBFA_000430	ABTW07_3494	ABTJ_00409	ACICU_03282	ACIAD3221	A1S_3082	ABAYE0406	ABZJ_03463	ABSDF0420
BJ-AB0715_03437	BJ-AB0868_03433	BJ-AB07104_03476	AB57_3533	ABK1_3331	ABBFA_000429	ABTW07_3495	ABTJ_00408	ACICU_03283	ACIAD3222	A1S_3083	ABAYE0405	ABZJ_03464	ABSDF0419
BJ-AB0715_03439	BJ-AB0868_03435	BJ-AB07104_03478	AB57_3535	ABK1_3333	ABBFA_000427	ABTW07_3497	ABTJ_00406	ACICU_03285	ACIAD3226	A1S_3085	ABAYE0403	ABZJ_03466	ABSDF0415
BJ-AB0715_03440	BJ-AB0868_03436	BJ-AB07104_03479	AB57_3536	ABK1_3334	ABBFA_000426	ABTW07_3498	ABTJ_00405	ACICU_03286	ACIAD3227	A1S_3086	ABAYE0402	ABZJ_03467	ABSDF0414
BJ-AB0715_03444	BJ-AB0868_03440	BJ-AB07104_03483	AB57_3540	ABK1_3338	ABBFA_000422	ABTW07_3502	ABTJ_00401	ACICU_03290	ACIAD3231	A1S_3090	ABAYE0398	ABZJ_03471	ABSDF0406
BJ-AB0715_03445	BJ-AB0868_03441	BJ-AB07104_03484	AB57_3541	ABK1_3339	ABBFA_000421	ABTW07_3503	ABTJ_00400	ACICU_03291	ACIAD3232	A1S_3091	ABAYE0397	ABZJ_03472	ABSDF0405
BJ-AB0715_03448	BJ-AB0868_03444	BJ-AB07104_03487	AB57_3544	ABK1_3342	ABBFA_000418	ABTW07_3506	ABTJ_00397	ACICU_03294	ACIAD3235	A1S_3095	ABAYE0394	ABZJ_03475	ABSDF0402
BJ-AB0715_03454	BJ-AB0868_03450	BJ-AB07104_03493	AB57_3549	ABK1_3347	ABBFA_000413	ABTW07_3511	ABTJ_00392	ACICU_03299	ACIAD3240	A1S_3099	ABAYE0389	ABZJ_03481	ABSDF0397
BJ-AB0715_03456	BJ-AB0868_03452	BJ-AB07104_03495	AB57_3552	ABK1_3349	ABBFA_000411	ABTW07_3513	ABTJ_00390	ACICU_03301	ACIAD3242	A1S_3101	ABAYE0387	ABZJ_03483	ABSDF0395
BJ-AB0715_03457	BJ-AB0868_03453	BJ-AB07104_03496	AB57_3553	ABK1_3350	ABBFA_000410	ABTW07_3514	ABTJ_00389	ACICU_03302	ACIAD3243	A1S_3102	ABAYE0386	ABZJ_03484	ABSDF0394
BJ-AB0715_03458	BJ-AB0868_03454	BJ-AB07104_03497	AB57_3554	ABK1_3351	ABBFA_000409	ABTW07_3515	ABTJ_00388	ACICU_03303	ACIAD3244	A1S_3103	ABAYE0385	ABZJ_03485	ABSDF0393
BJ-AB0715_03461	BJ-AB0868_03457	BJ-AB07104_03500	AB57_3557	ABK1_3354	ABBFA_000406	ABTW07_3518	ABTJ_00386	ACICU_03306	ACIAD3246	A1S_3105	ABAYE0382	ABZJ_03488	ABSDF0390
BJ-AB0715_03462	BJ-AB0868_03458	BJ-AB07104_03501	AB57_3558	ABK1_3355	ABBFA_000405	ABTW07_3519	ABTJ_00385	ACICU_03307	ACIAD3247	A1S_3106	ABAYE0381	ABZJ_03489	ABSDF0389
BJ-AB0715_03463	BJ-AB0868_03459	BJ-AB07104_03502	AB57_3559	ABK1_3356	ABBFA_000404	ABTW07_3520	ABTJ_00384	ACICU_03308	ACIAD3249	A1S_3107	ABAYE0379	ABZJ_03490	ABSDF0388
BJ-AB0715_03465	BJ-AB0868_03461	BJ-AB07104_03504	AB57_3561	ABK1_3358	ABBFA_000402	ABTW07_3522	ABTJ_00382	ACICU_03310	ACIAD0418	A1S_3109	ABAYE0377	ABZJ_03492	ABSDF0386
BJ-AB0715_03467	BJ-AB0868_03463	BJ-AB07104_03506	AB57_3563	ABK1_3360	ABBFA_000400	ABTW07_3524	ABTJ_00380	ACICU_03312	ACIAD3262	A1S_3111	ABAYE0375	ABZJ_03494	ABSDF0382
BJ-AB0715_03469	BJ-AB0868_03465	BJ-AB07104_03508	AB57_3565	ABK1_3362	ABBFA_000398	ABTW07_3526	ABTJ_00378	ACICU_03314	ACIAD3264	A1S_3113	ABAYE0373	ABZJ_03496	ABSDF0380
BJ-AB0715_03471	BJ-AB0868_03467	BJ-AB07104_03510	AB57_3567	ABK1_3364	ABBFA_000396	ABTW07_3528	ABTJ_00376	ACICU_03316	ACIAD1171	A1S_3115	ABAYE0371	ABZJ_03498	ABSDF0378
BJ-AB0715_03475	BJ-AB0868_03471	BJ-AB07104_03514	AB57_3571	ABK1_3368	ABBFA_000393	ABTW07_3532	ABTJ_00372	ACICU_03320	ACIAD3268	A1S_3118	ABAYE0368	ABZJ_03502	ABSDF0372
BJ-AB0715_03476	BJ-AB0868_03472	BJ-AB07104_03515	AB57_3572	ABK1_3369	ABBFA_000392	ABTW07_3533	ABTJ_00371	ACICU_03321	ACIAD3269	A1S_3119	ABAYE0367	ABZJ_03503	ABSDF0371
BJ-AB0715_03481	BJ-AB0868_03475	BJ-AB07104_03518	AB57_3577	ABK1_3372	ABBFA_000387	ABTW07_3536	ABTJ_00368	ACICU_03324	ACIAD3274	A1S_3123	ABAYE0362	ABZJ_03506	ABSDF0367
BJ-AB0715_03488	BJ-AB0868_03482	BJ-AB07104_03525	AB57_3584	ABK1_3379	ABBFA_000380	ABTW07_3543	ABTJ_00361	ACICU_03331	ACIAD1288	A1S_3129	ABAYE0355	ABZJ_03513	ABSDF0358
BJ-AB0715_03489	BJ-AB0868_03483	BJ-AB07104_03526	AB57_3585	ABK1_3380	ABBFA_000379	ABTW07_3544	ABTJ_00360	ACICU_03332	ACIAD1287	A1S_3130	ABAYE0354	ABZJ_03514	ABSDF0357
BJ-AB0715_03490	BJ-AB0868_03484	BJ-AB07104_03527	AB57_3586	ABK1_3381	ABBFA_000378	ABTW07_3545	ABTJ_00359	ACICU_03333	ACIAD1286	A1S_3131	ABAYE0353	ABZJ_03515	ABSDF0356
BJ-AB0715_03492	BJ-AB0868_03487	BJ-AB07104_03529	AB57_3588	ABK1_3383	ABBFA_000376	ABTW07_3547	ABTJ_00357	ACICU_03335	ACIAD2680	A1S_3134	ABAYE0351	ABZJ_03517	ABSDF0354
BJ-AB0715_03495	BJ-AB0868_03490	BJ-AB07104_03532	AB57_3591	ABK1_3386	ABBFA_000374	ABTW07_3550	ABTJ_00355	ACICU_03337	ACIAD3280	A1S_3136	ABAYE0348	ABZJ_03521	ABSDF0352
BJ-AB0715_03497	BJ-AB0868_03492	BJ-AB07104_03534	AB57_3593	ABK1_3388	ABBFA_000372	ABTW07_3552	ABTJ_00353	ACICU_03339	ACIAD3284	A1S_3138	ABAYE0346	ABZJ_03523	ABSDF0349
BJ-AB0715_03498	BJ-AB0868_03493	BJ-AB07104_03535	AB57_3594	ABK1_3389	ABBFA_000371	ABTW07_3553	ABTJ_00352	ACICU_03340	ACIAD3285	A1S_3139	ABAYE0345	ABZJ_03524	ABSDF0348
BJ-AB0715_03500	BJ-AB0868_03495	BJ-AB07104_03537	AB57_3596	ABK1_3391	ABBFA_000369	ABTW07_3555	ABTJ_00350	ACICU_03342	ACIAD3288	A1S_3141	ABAYE0343	ABZJ_03526	ABSDF0346
BJ-AB0715_03501	BJ-AB0868_03496	BJ-AB07104_03538	AB57_3597	ABK1_3392	ABBFA_000368	ABTW07_3556	ABTJ_00349	ACICU_03343	ACIAD3289	A1S_3142	ABAYE0342	ABZJ_03527	ABSDF0345
BJ-AB0715_03504	BJ-AB0868_03499	BJ-AB07104_03541	AB57_3600	ABK1_3395	ABBFA_000365	ABTW07_3559	ABTJ_00346	ACICU_03346	ACIAD3292	A1S_3146	ABAYE0338	ABZJ_03530	ABSDF0342
BJ-AB0715_03510	BJ-AB0868_03504	BJ-AB07104_03547	AB57_3606	ABK1_3400	ABBFA_000360	ABTW07_3564	ABTJ_00341	ACICU_03351	ACIAD3300	A1S_3151	ABAYE0333	ABZJ_03536	ABSDF0339
BJ-AB0715_03512	BJ-AB0868_03506	BJ-AB07104_03549	AB57_3608	ABK1_3402	ABBFA_000358	ABTW07_3566	ABTJ_00339	ACICU_03353	ACIAD3303	A1S_3153	ABAYE0331	ABZJ_03538	ABSDF0337
BJ-AB0715_03514	BJ-AB0868_03508	BJ-AB07104_03551	AB57_3610	ABK1_3404	ABBFA_000356	ABTW07_3568	ABTJ_00337	ACICU_03355	ACIAD3305	A1S_3155	ABAYE0329	ABZJ_03540	ABSDF0335
BJ-AB0715_03516	BJ-AB0868_03510	BJ-AB07104_03553	AB57_3612	ABK1_3406	ABBFA_000354	ABTW07_3570	ABTJ_00335	ACICU_03357	ACIAD3307	A1S_3158	ABAYE0327	ABZJ_03542	ABSDF0333
BJ-AB0715_03517	BJ-AB0868_03511	BJ-AB07104_03554	AB57_3613	ABK1_3407	ABBFA_000353	ABTW07_3571	ABTJ_00334	ACICU_03358	ACIAD3308	A1S_3159	ABAYE0326	ABZJ_03543	ABSDF0332
BJ-AB0715_03519	BJ-AB0868_03513	BJ-AB07104_03556	AB57_3615	ABK1_3409	ABBFA_000351	ABTW07_3573	ABTJ_00332	ACICU_03360	ACIAD3310	A1S_3161	ABAYE0324	ABZJ_03545	ABSDF0329
BJ-AB0715_03521	BJ-AB0868_03515	BJ-AB07104_03558	AB57_3617	ABK1_3411	ABBFA_000349	ABTW07_3575	ABTJ_00330	ACICU_03362	ACIAD3312	A1S_3163	ABAYE0322	ABZJ_03547	ABSDF0327
BJ-AB0715_03522	BJ-AB0868_03516	BJ-AB07104_03559	AB57_3618	ABK1_3412	ABBFA_000348	ABTW07_3576	ABTJ_00329	ACICU_03363	ACIAD3313	A1S_3164	ABAYE0321	ABZJ_03548	ABSDF0326
BJ-AB0715_03530	BJ-AB0868_03524	BJ-AB07104_03567	AB57_3626	ABK1_3420	ABBFA_000341	ABTW07_3584	ABTJ_00321	ACICU_03371	ACIAD3322	A1S_3169	ABAYE0313	ABZJ_03556	ABSDF0323
BJ-AB0715_03531	BJ-AB0868_03525	BJ-AB07104_03568	AB57_3627	ABK1_3421	ABBFA_000340	ABTW07_3585	ABTJ_00320	ACICU_03372	ACIAD3324	A1S_3170	ABAYE0312	ABZJ_03557	ABSDF0322
BJ-AB0715_03532	BJ-AB0868_03526	BJ-AB07104_03569	AB57_3628	ABK1_3422	ABBFA_000339	ABTW07_3586	ABTJ_00319	ACICU_03373	ACIAD3325	A1S_3171	ABAYE0311	ABZJ_03558	ABSDF0321
BJ-AB0715_03533	BJ-AB0868_03527	BJ-AB07104_03570	AB57_3629	ABK1_3423	ABBFA_000338	ABTW07_3587	ABTJ_00318	ACICU_03374	ACIAD3326	A1S_3172	ABAYE0310	ABZJ_03559	ABSDF0320
BJ-AB0715_03534	BJ-AB0868_03528	BJ-AB07104_03571	AB57_3630	ABK1_3424	ABBFA_000337	ABTW07_3588	ABTJ_00317	ACICU_03375	ACIAD3327	A1S_3173	ABAYE0309	ABZJ_03560	ABSDF0319
BJ-AB0715_03535	BJ-AB0868_03529	BJ-AB07104_03572	AB57_3631	ABK1_3425	ABBFA_000336	ABTW07_3589	ABTJ_00316	ACICU_03376	ACIAD3328	A1S_3174	ABAYE0308	ABZJ_03561	ABSDF0318
BJ-AB0715_03536	BJ-AB0868_03530	BJ-AB07104_03573	AB57_3632	ABK1_3426	ABBFA_000335	ABTW07_3590	ABTJ_00315	ACICU_03377	ACIAD3330	A1S_3175	ABAYE0307	ABZJ_03562	ABSDF0317
BJ-AB0715_03540	BJ-AB0868_03534	BJ-AB07104_03579	AB57_3635	ABK1_3432	ABBFA_000332	ABTW07_3594	ABTJ_00311	ACICU_03381	ACIAD3344	A1S_3178	ABAYE0303	ABZJ_03566	ABSDF0309
BJ-AB0715_03542	BJ-AB0868_03536	BJ-AB07104_03581	AB57_3637	ABK1_3434	ABBFA_000330	ABTW07_3596	ABTJ_00309	ACICU_03383	ACIAD3347	A1S_3180	ABAYE0301	ABZJ_03568	ABSDF0307
BJ-AB0715_03544	BJ-AB0868_03538	BJ-AB07104_03583	AB57_3639	ABK1_3436	ABBFA_000328	ABTW07_3598	ABTJ_00307	ACICU_03385	ACIAD3349	A1S_3182	ABAYE0299	ABZJ_03570	ABSDF0305
BJ-AB0715_03545	BJ-AB0868_03539	BJ-AB07104_03584	AB57_3640	ABK1_3437	ABBFA_000327	ABTW07_3599	ABTJ_00306	ACICU_03386	ACIAD3350	A1S_3185	ABAYE0298	ABZJ_03571	ABSDF0304
BJ-AB0715_03547	BJ-AB0868_03541	BJ-AB07104_03586	AB57_3642	ABK1_3439	ABBFA_000325	ABTW07_3601	ABTJ_00304	ACICU_03388	ACIAD3353	A1S_3187	ABAYE0296	ABZJ_03573	ABSDF0302
BJ-AB0715_03548	BJ-AB0868_03542	BJ-AB07104_03587	AB57_3643	ABK1_3440	ABBFA_000324	ABTW07_3602	ABTJ_00303	ACICU_03389	ACIAD3354	A1S_3190	ABAYE0295	ABZJ_03574	ABSDF0301
BJ-AB0715_03550	BJ-AB0868_03544	BJ-AB07104_03589	AB57_3645	ABK1_3442	ABBFA_000322	ABTW07_3604	ABTJ_00301	ACICU_03391	ACIAD3356	A1S_3192	ABAYE0293	ABZJ_03576	ABSDF0297
BJ-AB0715_03551	BJ-AB0868_03545	BJ-AB07104_03590	AB57_3646	ABK1_3443	ABBFA_000321	ABTW07_3605	ABTJ_00300	ACICU_03392	ACIAD3357	A1S_3193	ABAYE0292	ABZJ_03577	ABSDF0296
BJ-AB0715_03553	BJ-AB0868_03547	BJ-AB07104_03592	AB57_3648	ABK1_3445	ABBFA_000319	ABTW07_3607	ABTJ_00298	ACICU_03394	ACIAD3360	A1S_3195	ABAYE0290	ABZJ_03579	ABSDF0293
BJ-AB0715_03558	BJ-AB0868_03552	BJ-AB07104_03597	AB57_3653	ABK1_3450	ABBFA_000315	ABTW07_3612	ABTJ_00293	ACICU_03399	ACIAD3364	A1S_3202	ABAYE0284	ABZJ_03584	ABSDF0286
BJ-AB0715_03559	BJ-AB0868_03553	BJ-AB07104_03598	AB57_3654	ABK1_3451	ABBFA_000314	ABTW07_3613	ABTJ_00292	ACICU_03400	ACIAD3365	A1S_3203	ABAYE0283	ABZJ_03585	ABSDF0285
BJ-AB0715_03560	BJ-AB0868_03554	BJ-AB07104_03599	AB57_3655	ABK1_3452	ABBFA_000313	ABTW07_3614	ABTJ_00291	ACICU_03401	ACIAD3366	A1S_3204	ABAYE0282	ABZJ_03586	ABSDF0284
BJ-AB0715_03563	BJ-AB0868_03557	BJ-AB07104_03602	AB57_3658	ABK1_3455	ABBFA_000310	ABTW07_3617	ABTJ_00288	ACICU_03404	ACIAD3369	A1S_3207	ABAYE0279	ABZJ_03590	ABSDF0281
BJ-AB0715_03566	BJ-AB0868_03560	BJ-AB07104_03605	AB57_3661	ABK1_3458	ABBFA_000305	ABTW07_3620	ABTJ_00283	ACICU_03407	ACIAD1147	A1S_3211	ABAYE0276	ABZJ_03593	ABSDF0277
BJ-AB0715_03569	BJ-AB0868_03563	BJ-AB07104_03608	AB57_3664	ABK1_3461	ABBFA_000300	ABTW07_3623	ABTJ_00278	ACICU_03410	ACIAD3373	A1S_3213	ABAYE0273	ABZJ_03597	ABSDF0269
BJ-AB0715_03570	BJ-AB0868_03564	BJ-AB07104_03609	AB57_3665	ABK1_3462	ABBFA_000299	ABTW07_3624	ABTJ_00277	ACICU_03411	ACIAD3374	A1S_3214	ABAYE0272	ABZJ_03598	ABSDF0268
BJ-AB0715_03571	BJ-AB0868_03565	BJ-AB07104_03610	AB57_3666	ABK1_3463	ABBFA_000298	ABTW07_3625	ABTJ_00276	ACICU_03412	ACIAD3375	A1S_3217	ABAYE0271	ABZJ_03599	ABSDF0265
BJ-AB0715_03579	BJ-AB0868_03575	BJ-AB07104_03621	AB57_3672	ABK1_3470	ABBFA_000291	ABTW07_3634	ABTJ_00267	ACICU_03419	ACIAD3380	A1S_3221	ABAYE0265	ABZJ_03612	ABSDF0259
BJ-AB0715_03582	BJ-AB0868_03578	BJ-AB07104_03624	AB57_3675	ABK1_3473	ABBFA_000288	ABTW07_3637	ABTJ_00264	ACICU_03422	ACIAD3384	A1S_3225	ABAYE0262	ABZJ_03615	ABSDF0255
BJ-AB0715_03585	BJ-AB0868_03581	BJ-AB07104_03627	AB57_3678	ABK1_3476	ABBFA_000285	ABTW07_3640	ABTJ_00261	ACICU_03425	ACIAD3389	A1S_3230	ABAYE0258	ABZJ_03618	ABSDF0249
BJ-AB0715_03586	BJ-AB0868_03582	BJ-AB07104_03628	AB57_3679	ABK1_3477	ABBFA_000284	ABTW07_3641	ABTJ_00260	ACICU_03426	ACIAD3390	A1S_3231	ABAYE0257	ABZJ_03619	ABSDF0248
BJ-AB0715_03588	BJ-AB0868_03584	BJ-AB07104_03630	AB57_3681	ABK1_3479	ABBFA_000280	ABTW07_3643	ABTJ_00256	ACICU_03429	ACIAD3394	A1S_3233	ABAYE0255	ABZJ_03621	ABSDF0243
BJ-AB0715_03593	BJ-AB0868_03589	BJ-AB07104_03635	AB57_3687	ABK1_3484	ABBFA_000275	ABTW07_3648	ABTJ_00251	ACICU_03434	ACIAD3398	A1S_3238	ABAYE0250	ABZJ_03626	ABSDF0237
BJ-AB0715_03598	BJ-AB0868_03593	BJ-AB07104_03639	AB57_3690	ABK1_3487	ABBFA_000272	ABTW07_3652	ABTJ_00247	ACICU_03437	ACIAD3401	A1S_3242	ABAYE0246	ABZJ_03630	ABSDF0231
BJ-AB0715_03600	BJ-AB0868_03595	BJ-AB07104_03641	AB57_3692	ABK1_3489	ABBFA_000270	ABTW07_3654	ABTJ_00245	ACICU_03439	ACIAD3403	A1S_3244	ABAYE0244	ABZJ_03632	ABSDF0228
BJ-AB0715_03606	BJ-AB0868_03601	BJ-AB07104_03647	AB57_3698	ABK1_3494	ABBFA_000264	ABTW07_3659	ABTJ_00240	ACICU_03444	ACIAD3407	A1S_3250	ABAYE0238	ABZJ_03637	ABSDF3347
BJ-AB0715_03608	BJ-AB0868_03603	BJ-AB07104_03649	AB57_3700	ABK1_3496	ABBFA_000262	ABTW07_3661	ABTJ_00238	ACICU_03446	ACIAD3408	A1S_3252	ABAYE0236	ABZJ_03639	ABSDF3349
BJ-AB0715_03632	BJ-AB0868_03620	BJ-AB07104_03666	AB57_3717	ABK1_3518	ABBFA_000244	ABTW07_3676	ABTJ_00217	ACICU_03468	ACIAD3169	A1S_3271	ABAYE0218	ABZJ_03656	ABSDF3373
BJ-AB0715_03633	BJ-AB0868_03621	BJ-AB07104_03667	AB57_3719	ABK1_3519	ABBFA_000243	ABTW07_3677	ABTJ_00216	ACICU_03469	ACIAD3170	A1S_3272	ABAYE0217	ABZJ_03657	ABSDF3374
BJ-AB0715_03655	BJ-AB0868_03623	BJ-AB07104_03669	AB57_3722	ABK1_3521	ABBFA_000206	ABTW07_3679	ABTJ_00212	ACICU_03471	ACIAD3442	A1S_3275	ABAYE0215	ABZJ_03660	ABSDF3377
BJ-AB0715_03661	BJ-AB0868_03629	BJ-AB07104_03676	AB57_3727	ABK1_3526	ABBFA_000201	ABTW07_3684	ABTJ_00207	ACICU_03476	ACIAD3445	A1S_3280	ABAYE0210	ABZJ_03666	ABSDF3383
BJ-AB0715_03662	BJ-AB0868_03630	BJ-AB07104_03677	AB57_3728	ABK1_3527	ABBFA_000200	ABTW07_3685	ABTJ_00206	ACICU_03477	ACIAD3446	A1S_3281	ABAYE0209	ABZJ_03667	ABSDF3384
BJ-AB0715_03663	BJ-AB0868_03631	BJ-AB07104_03678	AB57_3729	ABK1_3528	ABBFA_000199	ABTW07_3686	ABTJ_00205	ACICU_03478	ACIAD3447	A1S_3282	ABAYE0208	ABZJ_03668	ABSDF3385
BJ-AB0715_03664	BJ-AB0868_03632	BJ-AB07104_03679	AB57_3730	ABK1_3529	ABBFA_000198	ABTW07_3687	ABTJ_00204	ACICU_03479	ACIAD3448	A1S_3283	ABAYE0207	ABZJ_03669	ABSDF3386
BJ-AB0715_03665	BJ-AB0868_03633	BJ-AB07104_03680	AB57_3731	ABK1_3530	ABBFA_000197	ABTW07_3688	ABTJ_00203	ACICU_03480	ACIAD2342	A1S_3284	ABAYE0206	ABZJ_03670	ABSDF3388
BJ-AB0715_03668	BJ-AB0868_03636	BJ-AB07104_03683	AB57_3734	ABK1_3533	ABBFA_000194	ABTW07_3691	ABTJ_00200	ACICU_03483	ACIAD3449	A1S_3287	ABAYE0203	ABZJ_03673	ABSDF3392
BJ-AB0715_03669	BJ-AB0868_03637	BJ-AB07104_03684	AB57_3735	ABK1_3534	ABBFA_000193	ABTW07_3692	ABTJ_00199	ACICU_03484	ACIAD3450	A1S_3288	ABAYE0202	ABZJ_03674	ABSDF3393
BJ-AB0715_03670	BJ-AB0868_03638	BJ-AB07104_03685	AB57_3736	ABK1_3535	ABBFA_000192	ABTW07_3693	ABTJ_00198	ACICU_03485	ACIAD3451	A1S_3289	ABAYE0201	ABZJ_03675	ABSDF3394
BJ-AB0715_03672	BJ-AB0868_03640	BJ-AB07104_03687	AB57_3738	ABK1_3537	ABBFA_000190	ABTW07_3695	ABTJ_00196	ACICU_03487	ACIAD3453	A1S_3291	ABAYE0199	ABZJ_03676	ABSDF3399
BJ-AB0715_03674	BJ-AB0868_03642	BJ-AB07104_03689	AB57_3740	ABK1_3539	ABBFA_000188	ABTW07_3697	ABTJ_00194	ACICU_03489	ACIAD2738	A1S_3293	ABAYE0197	ABZJ_03678	ABSDF3401
BJ-AB0715_03676	BJ-AB0868_03644	BJ-AB07104_03691	AB57_3742	ABK1_3541	ABBFA_000186	ABTW07_3699	ABTJ_00192	ACICU_03491	ACIAD3455	A1S_3295	ABAYE0195	ABZJ_03680	ABSDF3403
BJ-AB0715_03677	BJ-AB0868_03646	BJ-AB07104_03693	AB57_3743	ABK1_3542	ABBFA_000185	ABTW07_3701	ABTJ_00190	ACICU_03492	ACIAD3457	A1S_3296	ABAYE0194	ABZJ_03683	ABSDF3404
BJ-AB0715_03679	BJ-AB0868_03648	BJ-AB07104_03695	AB57_3745	ABK1_3544	ABBFA_000183	ABTW07_3703	ABTJ_00188	ACICU_03494	ACIAD3460	A1S_3298	ABAYE0190	ABZJ_03685	ABSDF3406
BJ-AB0715_03681	BJ-AB0868_03650	BJ-AB07104_03697	AB57_3747	ABK1_3546	ABBFA_000181	ABTW07_3705	ABTJ_00186	ACICU_03496	ACIAD3463	A1S_3300	ABAYE0188	ABZJ_03687	ABSDF3427
BJ-AB0715_03683	BJ-AB0868_03652	BJ-AB07104_03699	AB57_3749	ABK1_3548	ABBFA_000179	ABTW07_3707	ABTJ_00184	ACICU_03498	ACIAD3465	A1S_3302	ABAYE0186	ABZJ_03689	ABSDF3429
BJ-AB0715_03684	BJ-AB0868_03653	BJ-AB07104_03700	AB57_3750	ABK1_3549	ABBFA_000178	ABTW07_3708	ABTJ_00183	ACICU_03499	ACIAD3468	A1S_3303	ABAYE0185	ABZJ_03690	ABSDF3430
BJ-AB0715_03686	BJ-AB0868_03655	BJ-AB07104_03702	AB57_3752	ABK1_3551	ABBFA_000176	ABTW07_3710	ABTJ_00181	ACICU_03501	ACIAD3470	A1S_3305	ABAYE0183	ABZJ_03692	ABSDF3432
BJ-AB0715_03690	BJ-AB0868_03659	BJ-AB07104_03707	AB57_3756	ABK1_3555	ABBFA_000172	ABTW07_3714	ABTJ_00176	ACICU_03505	ACIAD3475	A1S_3309	ABAYE0179	ABZJ_03697	ABSDF3437
BJ-AB0715_03692	BJ-AB0868_03662	BJ-AB07104_03710	AB57_3760	ABK1_3557	ABBFA_000169	ABTW07_3716	ABTJ_00174	ACICU_03507	ACIAD3477	A1S_3311	ABAYE0177	ABZJ_03699	ABSDF3439
BJ-AB0715_03694	BJ-AB0868_03664	BJ-AB07104_03712	AB57_3761	ABK1_3559	ABBFA_000168	ABTW07_3718	ABTJ_00172	ACICU_03509	ACIAD3479	A1S_3313	ABAYE0175	ABZJ_03701	ABSDF3441
BJ-AB0715_03695	BJ-AB0868_03665	BJ-AB07104_03713	AB57_3762	ABK1_3560	ABBFA_000167	ABTW07_3719	ABTJ_00171	ACICU_03510	ACIAD3496	A1S_3314	ABAYE0174	ABZJ_03702	ABSDF3442
BJ-AB0715_03696	BJ-AB0868_03666	BJ-AB07104_03714	AB57_3763	ABK1_3561	ABBFA_000166	ABTW07_3720	ABTJ_00170	ACICU_03511	ACIAD3497	A1S_3315	ABAYE0173	ABZJ_03703	ABSDF3443
BJ-AB0715_03699	BJ-AB0868_03669	BJ-AB07104_03717	AB57_3766	ABK1_3563	ABBFA_000164	ABTW07_3722	ABTJ_00167	ACICU_03514	ACIAD3499	A1S_3317	ABAYE0170	ABZJ_03706	ABSDF3445
BJ-AB0715_03700	BJ-AB0868_03670	BJ-AB07104_03718	AB57_3767	ABK1_3564	ABBFA_000163	ABTW07_3723	ABTJ_00166	ACICU_03515	ACIAD3500	A1S_3318	ABAYE0169	ABZJ_03707	ABSDF3446
BJ-AB0715_03702	BJ-AB0868_03672	BJ-AB07104_03720	AB57_3769	ABK1_3566	ABBFA_000162	ABTW07_3725	ABTJ_00164	ACICU_03517	ACIAD3502	A1S_3320	ABAYE0167	ABZJ_03709	ABSDF3448
BJ-AB0715_03703	BJ-AB0868_03673	BJ-AB07104_03721	AB57_3770	ABK1_3567	ABBFA_000161	ABTW07_3726	ABTJ_00163	ACICU_03518	ACIAD3503	A1S_3321	ABAYE0166	ABZJ_03710	ABSDF3449
BJ-AB0715_03707	BJ-AB0868_03677	BJ-AB07104_03725	AB57_3774	ABK1_3573	ABBFA_000157	ABTW07_3730	ABTJ_00156	ACICU_03522	ACIAD3505	A1S_3326	ABAYE0161	ABZJ_03714	ABSDF3456
BJ-AB0715_03709	BJ-AB0868_03679	BJ-AB07104_03727	AB57_3776	ABK1_3575	ABBFA_000155	ABTW07_3732	ABTJ_00154	ACICU_03524	ACIAD3506	A1S_3327	ABAYE0158	ABZJ_03716	ABSDF3462
BJ-AB0715_03710	BJ-AB0868_03680	BJ-AB07104_03728	AB57_3777	ABK1_3576	ABBFA_000154	ABTW07_3733	ABTJ_00153	ACICU_03525	ACIAD3507	A1S_3328	ABAYE0157	ABZJ_03717	ABSDF3463
BJ-AB0715_03714	BJ-AB0868_03684	BJ-AB07104_03732	AB57_3782	ABK1_3580	ABBFA_000150	ABTW07_3737	ABTJ_00149	ACICU_03529	ACIAD3511	A1S_3331	ABAYE0153	ABZJ_03721	ABSDF3467
BJ-AB0715_03715	BJ-AB0868_03685	BJ-AB07104_03733	AB57_3783	ABK1_3581	ABBFA_000149	ABTW07_3738	ABTJ_00148	ACICU_03530	ACIAD3512	A1S_3332	ABAYE0152	ABZJ_03722	ABSDF3468
BJ-AB0715_03717	BJ-AB0868_03687	BJ-AB07104_03735	AB57_3785	ABK1_3583	ABBFA_000147	ABTW07_3740	ABTJ_00146	ACICU_03532	ACIAD3515	A1S_3334	ABAYE0150	ABZJ_03724	ABSDF3470
BJ-AB0715_03718	BJ-AB0868_03688	BJ-AB07104_03736	AB57_3786	ABK1_3584	ABBFA_000146	ABTW07_3741	ABTJ_00145	ACICU_03533	ACIAD3516	A1S_3335	ABAYE0149	ABZJ_03725	ABSDF3471
BJ-AB0715_03719	BJ-AB0868_03689	BJ-AB07104_03737	AB57_3787	ABK1_3585	ABBFA_000145	ABTW07_3742	ABTJ_00144	ACICU_03534	ACIAD3517	A1S_3336	ABAYE0148	ABZJ_03726	ABSDF3472
BJ-AB0715_03720	BJ-AB0868_03690	BJ-AB07104_03738	AB57_3788	ABK1_3586	ABBFA_000144	ABTW07_3743	ABTJ_00143	ACICU_03535	ACIAD3518	A1S_3337	ABAYE0147	ABZJ_03727	ABSDF3473
BJ-AB0715_03724	BJ-AB0868_03693	BJ-AB07104_03741	AB57_3791	ABK1_3589	ABBFA_000141	ABTW07_3746	ABTJ_00140	ACICU_03538	ACIAD3525	A1S_3340	ABAYE0144	ABZJ_03730	ABSDF3480
BJ-AB0715_03726	BJ-AB0868_03695	BJ-AB07104_03743	AB57_3793	ABK1_3591	ABBFA_000139	ABTW07_3748	ABTJ_00138	ACICU_03540	ACIAD3528	A1S_3342	ABAYE0142	ABZJ_03732	ABSDF3482
BJ-AB0715_03727	BJ-AB0868_03696	BJ-AB07104_03744	AB57_3794	ABK1_3592	ABBFA_000138	ABTW07_3749	ABTJ_00137	ACICU_03541	ACIAD3529	A1S_3343	ABAYE0141	ABZJ_03733	ABSDF3483
BJ-AB0715_03728	BJ-AB0868_03697	BJ-AB07104_03745	AB57_3795	ABK1_3593	ABBFA_000137	ABTW07_3750	ABTJ_00136	ACICU_03542	ACIAD3530	A1S_3344	ABAYE0140	ABZJ_03734	ABSDF3484
BJ-AB0715_03733	BJ-AB0868_03702	BJ-AB07104_03750	AB57_3800	ABK1_3599	ABBFA_000133	ABTW07_3755	ABTJ_00131	ACICU_03547	ACIAD3535	A1S_3350	ABAYE0135	ABZJ_03739	ABSDF3489
BJ-AB0715_03735	BJ-AB0868_03704	BJ-AB07104_03752	AB57_3802	ABK1_3601	ABBFA_000131	ABTW07_3757	ABTJ_00129	ACICU_03549	ACIAD3537	A1S_3352	ABAYE0133	ABZJ_03741	ABSDF3491
BJ-AB0715_03737	BJ-AB0868_03706	BJ-AB07104_03754	AB57_3804	ABK1_3603	ABBFA_000129	ABTW07_3759	ABTJ_00127	ACICU_03551	ACIAD0762	A1S_3354	ABAYE0131	ABZJ_03743	ABSDF3493
BJ-AB0715_03739	BJ-AB0868_03708	BJ-AB07104_03756	AB57_3806	ABK1_3605	ABBFA_000127	ABTW07_3761	ABTJ_00125	ACICU_03553	ACIAD3540	A1S_3356	ABAYE0129	ABZJ_03745	ABSDF3498
BJ-AB0715_03740	BJ-AB0868_03709	BJ-AB07104_03757	AB57_3807	ABK1_3606	ABBFA_000126	ABTW07_3762	ABTJ_00124	ACICU_03554	ACIAD3541	A1S_3357	ABAYE0128	ABZJ_03746	ABSDF3499
BJ-AB0715_03741	BJ-AB0868_03710	BJ-AB07104_03758	AB57_3808	ABK1_3607	ABBFA_000125	ABTW07_3763	ABTJ_00123	ACICU_03555	ACIAD3542	A1S_3358	ABAYE0127	ABZJ_03747	ABSDF3500
BJ-AB0715_03744	BJ-AB0868_03713	BJ-AB07104_03761	AB57_3809	ABK1_3608	ABBFA_000124	ABTW07_3765	ABTJ_00121	ACICU_03556	ACIAD3544	A1S_3359	ABAYE0126	ABZJ_03750	ABSDF3504
BJ-AB0715_03745	BJ-AB0868_03714	BJ-AB07104_03762	AB57_3810	ABK1_3609	ABBFA_000123	ABTW07_3766	ABTJ_00120	ACICU_03557	ACIAD3545	A1S_3360	ABAYE0125	ABZJ_03751	ABSDF3505
BJ-AB0715_03746	BJ-AB0868_03715	BJ-AB07104_03763	AB57_3811	ABK1_3610	ABBFA_000122	ABTW07_3767	ABTJ_00119	ACICU_03558	ACIAD3547	A1S_3361	ABAYE0124	ABZJ_03752	ABSDF3506
BJ-AB0715_03758	BJ-AB0868_03720	BJ-AB07104_03770	AB57_3818	ABK1_3616	ABBFA_000115	ABTW07_3772	ABTJ_00114	ACICU_03564	ACIAD3548	A1S_3365	ABAYE0117	ABZJ_03755	ABSDF3512
BJ-AB0715_03762	BJ-AB0868_03724	BJ-AB07104_03774	AB57_3822	ABK1_3620	ABBFA_000111	ABTW07_3776	ABTJ_00110	ACICU_03568	ACIAD3552	A1S_3369	ABAYE0112	ABZJ_03759	ABSDF3516
BJ-AB0715_03764	BJ-AB0868_03726	BJ-AB07104_03776	AB57_3824	ABK1_3622	ABBFA_000109	ABTW07_3778	ABTJ_00108	ACICU_03570	ACIAD3554	A1S_3371	ABAYE0110	ABZJ_03761	ABSDF3519
BJ-AB0715_03765	BJ-AB0868_03727	BJ-AB07104_03777	AB57_3825	ABK1_3623	ABBFA_000108	ABTW07_3779	ABTJ_00107	ACICU_03571	ACIAD3555	A1S_3372	ABAYE0109	ABZJ_03762	ABSDF3520
BJ-AB0715_03768	BJ-AB0868_03730	BJ-AB07104_03780	AB57_3828	ABK1_3626	ABBFA_000105	ABTW07_3782	ABTJ_00104	ACICU_03574	ACIAD3558	A1S_3376	ABAYE0106	ABZJ_03765	ABSDF3523
BJ-AB0715_03770	BJ-AB0868_03735	BJ-AB07104_03785	AB57_3830	ABK1_3631	ABBFA_000103	ABTW07_3787	ABTJ_00099	ACICU_03578	ACIAD3560	A1S_3378	ABAYE0104	ABZJ_03770	ABSDF3526
BJ-AB0715_03772	BJ-AB0868_03737	BJ-AB07104_03787	AB57_3832	ABK1_3633	ABBFA_000101	ABTW07_3789	ABTJ_00097	ACICU_03580	ACIAD3562	A1S_3380	ABAYE0102	ABZJ_03772	ABSDF3528
BJ-AB0715_03773	BJ-AB0868_03738	BJ-AB07104_03788	AB57_3833	ABK1_3636	ABBFA_000100	ABTW07_3790	ABTJ_00096	ACICU_03583	ACIAD3563	A1S_3383	ABAYE0101	ABZJ_03773	ABSDF3531
BJ-AB0715_03775	BJ-AB0868_03740	BJ-AB07104_03790	AB57_3835	ABK1_3638	ABBFA_000098	ABTW07_3792	ABTJ_00094	ACICU_03585	ACIAD3565	A1S_3385	ABAYE0099	ABZJ_03775	ABSDF3576
BJ-AB0715_03776	BJ-AB0868_03741	BJ-AB07104_03791	AB57_3836	ABK1_3639	ABBFA_000097	ABTW07_3793	ABTJ_00093	ACICU_03586	ACIAD3567	A1S_3386	ABAYE0098	ABZJ_03776	ABSDF3575
BJ-AB0715_03777	BJ-AB0868_03742	BJ-AB07104_03792	AB57_3837	ABK1_3640	ABBFA_000096	ABTW07_3794	ABTJ_00092	ACICU_03587	ACIAD3568	A1S_3387	ABAYE0097	ABZJ_03777	ABSDF3574
BJ-AB0715_03778	BJ-AB0868_03743	BJ-AB07104_03793	AB57_3838	ABK1_3641	ABBFA_000095	ABTW07_3795	ABTJ_00091	ACICU_03588	ACIAD3570	A1S_3388	ABAYE0096	ABZJ_03778	ABSDF3573
BJ-AB0715_03779	BJ-AB0868_03744	BJ-AB07104_03794	AB57_3839	ABK1_3642	ABBFA_000094	ABTW07_3796	ABTJ_00090	ACICU_03589	ACIAD3571	A1S_3389	ABAYE0095	ABZJ_03779	ABSDF3572
BJ-AB0715_03780	BJ-AB0868_03745	BJ-AB07104_03795	AB57_3840	ABK1_3643	ABBFA_000093	ABTW07_3797	ABTJ_00089	ACICU_03590	ACIAD3572	A1S_3390	ABAYE0094	ABZJ_03780	ABSDF3571
BJ-AB0715_03791	BJ-AB0868_03756	BJ-AB07104_03808	AB57_3858	ABK1_3654	ABBFA_000078	ABTW07_3807	ABTJ_00079	ACICU_03600	ACIAD1168	A1S_3404	ABAYE0077	ABZJ_03790	ABSDF3582
BJ-AB0715_03808	BJ-AB0868_03773	BJ-AB07104_03825	AB57_3875	ABK1_3671	ABBFA_000061	ABTW07_3824	ABTJ_00062	ACICU_03618	ACIAD3584	A1S_3422	ABAYE0059	ABZJ_03808	ABSDF3605
BJ-AB0715_03814	BJ-AB0868_03779	BJ-AB07104_03832	AB57_3881	ABK1_3677	ABBFA_000055	ABTW07_3830	ABTJ_00056	ACICU_03624	ACIAD3596	A1S_3427	ABAYE0053	ABZJ_03815	ABSDF3613
BJ-AB0715_03822	BJ-AB0868_03787	BJ-AB07104_03840	AB57_3889	ABK1_3686	ABBFA_000047	ABTW07_3838	ABTJ_00048	ACICU_03632	ACIAD3608	A1S_3434	ABAYE0045	ABZJ_03823	ABSDF3623
BJ-AB0715_03823	BJ-AB0868_03788	BJ-AB07104_03841	AB57_3890	ABK1_3687	ABBFA_000046	ABTW07_3839	ABTJ_00047	ACICU_03633	ACIAD3611	A1S_3435	ABAYE0044	ABZJ_03824	ABSDF3624
BJ-AB0715_03824	BJ-AB0868_03789	BJ-AB07104_03842	AB57_3891	ABK1_3688	ABBFA_000045	ABTW07_3840	ABTJ_00046	ACICU_03634	ACIAD3612	A1S_3436	ABAYE0043	ABZJ_03825	ABSDF3625
BJ-AB0715_03827	BJ-AB0868_03793	BJ-AB07104_03846	AB57_3894	ABK1_3691	ABBFA_000042	ABTW07_3843	ABTJ_00043	ACICU_03638	ACIAD3615	A1S_3438	ABAYE0040	ABZJ_03829	ABSDF3629
BJ-AB0715_03828	BJ-AB0868_03794	BJ-AB07104_03847	AB57_3896	ABK1_3692	ABBFA_000041	ABTW07_3844	ABTJ_00042	ACICU_03639	ACIAD3616	A1S_3439	ABAYE0039	ABZJ_03830	ABSDF3630
BJ-AB0715_03829	BJ-AB0868_03795	BJ-AB07104_03848	AB57_3897	ABK1_3693	ABBFA_000040	ABTW07_3845	ABTJ_00041	ACICU_03640	ACIAD3617	A1S_3440	ABAYE0038	ABZJ_03831	ABSDF3631
BJ-AB0715_03830	BJ-AB0868_03796	BJ-AB07104_03849	AB57_3898	ABK1_3694	ABBFA_000039	ABTW07_3846	ABTJ_00040	ACICU_03641	ACIAD3618	A1S_3441	ABAYE0037	ABZJ_03832	ABSDF3632
BJ-AB0715_03833	BJ-AB0868_03799	BJ-AB07104_03852	AB57_3901	ABK1_3697	ABBFA_000036	ABTW07_3849	ABTJ_00037	ACICU_03644	ACIAD3621	A1S_3443	ABAYE0033	ABZJ_03835	ABSDF3636
BJ-AB0715_03834	BJ-AB0868_03800	BJ-AB07104_03853	AB57_3902	ABK1_3698	ABBFA_000035	ABTW07_3850	ABTJ_00036	ACICU_03645	ACIAD3622	A1S_3444	ABAYE0032	ABZJ_03836	ABSDF3637
BJ-AB0715_03836	BJ-AB0868_03802	BJ-AB07104_03855	AB57_3904	ABK1_3700	ABBFA_000033	ABTW07_3852	ABTJ_00034	ACICU_03647	ACIAD3625	A1S_3447	ABAYE0030	ABZJ_03838	ABSDF3639
BJ-AB0715_03837	BJ-AB0868_03803	BJ-AB07104_03856	AB57_3905	ABK1_3701	ABBFA_000032	ABTW07_3853	ABTJ_00033	ACICU_03648	ACIAD3626	A1S_3448	ABAYE0029	ABZJ_03839	ABSDF3640
BJ-AB0715_03838	BJ-AB0868_03804	BJ-AB07104_03857	AB57_3906	ABK1_3703	ABBFA_000031	ABTW07_3854	ABTJ_00032	ACICU_03649	ACIAD3627	A1S_3449	ABAYE0028	ABZJ_03840	ABSDF3641
BJ-AB0715_03841	BJ-AB0868_03807	BJ-AB07104_03860	AB57_3909	ABK1_3706	ABBFA_000028	ABTW07_3857	ABTJ_00029	ACICU_03652	ACIAD3630	A1S_3453	ABAYE0025	ABZJ_03843	ABSDF3645
BJ-AB0715_03842	BJ-AB0868_03808	BJ-AB07104_03861	AB57_3910	ABK1_3707	ABBFA_000027	ABTW07_3858	ABTJ_00028	ACICU_03653	ACIAD3635	A1S_3454	ABAYE0024	ABZJ_03844	ABSDF3646
BJ-AB0715_03843	BJ-AB0868_03809	BJ-AB07104_03862	AB57_3911	ABK1_3708	ABBFA_000026	ABTW07_3859	ABTJ_00027	ACICU_03654	ACIAD1266	A1S_3455	ABAYE0023	ABZJ_03845	ABSDF3647
BJ-AB0715_03845	BJ-AB0868_03811	BJ-AB07104_03864	AB57_3913	ABK1_3710	ABBFA_000024	ABTW07_3861	ABTJ_00025	ACICU_03656	ACIAD3638	A1S_3457	ABAYE0021	ABZJ_03847	ABSDF3649
