# Supplementary material for: Complete Genome Analysis of Three Acinetobacter baumannii Clinical Isolates in China for Insight into the Diversification of Drug Resistance Elements
Source: PLoS One. 2013 Jun 24;8(6):e66584. doi: 10.1371/journal.pone.0066584 (PMC3691203; doi:10.1371/journal.pone.0066584)
Supplement: Table S6 — Primer sequences for gap-closing PCR. (XLSX) [file pone.0066584.s011.xlsx]

## Sheet: Sheet1
Primer Name	Sequence (5'-3')	Length (nt)	Product Size (bp)
NODE_314	GCTATGTGCTTCGGGTTTTG	20
NODE_786	GATCCGATACCAGGACACAAA	21
NODE_1345	TTCTGATCAACATAGCGCCTTA	22
NODE_1015	GGCCAAACGAACAATCAACT	20
NODE_1580	GGCAGACCAGCAGAGATCAT	20
NODE_439	GGGTTAAATGGCTGCAAGAT	20
NODE_225	ATCGCCACGGAAGTATGAAC	20
NODE_1750	CTGGCTTTGCTTCCAGATGT	20
NODE_2169	ACTTCCCCTCCTCAACTCGT	20
NODE_225	TGCTGAACCGTACAACCAGA	20
NODE_528	TATGTTGACGATGCCGAAAA	20
NODE_1030	GAACTTGCTTGCAAAATAGCC	21
NODE_1339	CCCATTCAAGAAATCCCTCA	20	204
NODE_631	GAACATTCCCACCCTCGATA	20
NODE_1898	TGCAATGCAATGTCAAGGTT	20	240
NODE_79	TTGCTGAGGTAACCGATGAA	20
NODE_2533	TCGTGATGACGACGATGAA	19	150
NODE_52	CGTAAAGCGTCCATAAGCATC	21
NODE_656	AGCCATTTGAATTACCACCA	20	224
NODE_798	GATGTAATCGGTTCGGCAAT	20
NODE_798	CTCGCTCCAGAAAGAATTGAA	21	250
NODE_615	ATAGTTGCACCCGACACCAC	20
NODE_255	TACAAGTACAGCCCGCACAG	20	230
NODE_1100	CAACAGCAGGAATCGCATTA	20
NODE_1322	CACCATCAGGCAAATTTCAA	20	200
NODE_401	CCTTAAAGCAGTTTGAGGGCTA	22
NODE_401	TGCTAAGTTTTTGGTTGTGACG	22	199
NODE_909	ACTGCAAAAGGGTTGAGCAC	20
NODE_1322	CACCATCAGGCAAATTTCAA	20	164
NODE_909	TTGACAGGCTGATTCAAACG	20
NODE_1322	CACCATCAGGCAAATTTCAA	20	219
NODE_909	ACTGCAAAAGGGTTGAGCAC	20
NODE_676	CGTCTGCATCAGCAACATCT	20	200
NODE_1184	TCCAGCGACTAACAATGGTG	20
NODE_1184	AGCGTCCAAGTACCATCACC	20	245
NODE_468	CGATACCACTGCACCTGATG	20
NODE_403	AGGAAGAGCAGAAACGCAAA	20	178
NODE_215	GTCGAAAAGCGTTTGACACC	20
NODE_2377	AAATGGCACAACTGCTACAGG	21	159
NODE_628	CAGTTACTACACCAAGAGGGTTATCA	26
NODE_1609	CGTGCCATCAAAATCGAATA	20	240
NODE_219	GCTGAAATCACTTCCCTGCT	20
NODE_534	TCCAAACTGTTCCATCGTCA	20	170
NODE_1527	CAACGATTGATGCTTCAGGT	20
TJ-L1	CTGATCGGTGGATTGGCTAT	20	1800
TJ-R1	GCTGCTGACAGTGTGTTTGG	20
TJ-L2	TGCAAAGTAGCGGCCTTTAT	20	1744
TJ-R2	GCGGGTTGATAACTGTCGAG	20
TJ-L3	CTCTTTGTAATCGGCACTGG	20	1826
TJ-R3	ATCCGTTTTCTGGTTCTCCA	20
OXA-23-L	GATCGGATTGGAGAACCAGA	20	522
OXA-23-R	TCATTACGTATAGATGCCGG	20
virD4-L1	GCAAAAGCATTCATCCCTGT	20	920
virD4-R1	CTCTCACGCAGAACAAGTGG	20
INV-7104-L-L1	CGCATCGTTAGGAACCATTT	20	1130
INV-7104-L-R1	GCCCACTTTAAGCAACATGC	20
INV-7104-L-L2	CATTGTGGTACAAGCGGATG	20	234
INV-7104-L-R2	CAAAGAAGCGCGTCACAATA	20
INV-7104-R1-L	ACATAGCCGGATACGGTGAG	20	1206
INV-7104-R1-R	TTGAAGGTGGCGGCTATTAC	20
